# Supplementary material for: MYC amplification at diagnosis drives therapy-induced hypermutation of recurrent glioma
Source: Research Square preprint supplement (doi:10.21203/rs.3.rs-138020/v1), 2021-01-05
Supplement: Supplementary file 2 [file f82f9ed924241040221fe47f.xlsx]

## Sheet: Sheet1
Table S1. Clinical information of the glioma patients with longitudinal sequencing data
Patient ID	Cohort	Molecular Pathology of Initial Tumor	Molecular Pathology of Recurrent Tumor	Grade of Initial Tumor	Grade of Recurrent Tumor	Age at initial diagnosis	Gender	Race	TMZ Treatment Before Recurrence	Overall Survival (OS, months)	Censor of OS (0 alive/1 dead)	Surgerical Interval (months)	Hypermutation of Initial Tumor	Hypermutation of Recurrent Tumor	IDH mutation	1p/19q co-deletion	WGS_normal	WGS_Initial	WGS_Recurrence	WES_Normal	WES_Initial	WES_Recurrence	RNAseq Initial	RNAseq Recurrence	Mutation Source	CNA Source
PS001	INCB	Glioblastoma, IDH-wildtype	Glioblastoma, IDH-wildtype	IV	IV	70	M	non-Asian	1	6.6	1	5.16667	No	No	IDHwt	noncodel	NO	NO	NO	YES	YES	YES	YES	YES	Wang et al	Wang et al
PS002	INCB	Glioblastoma, IDH-wildtype	Glioblastoma, IDH-wildtype	IV	IV	42	M	non-Asian	1	17.73	1	10	No	No	IDHwt	noncodel	NO	NO	NO	YES	YES	YES	YES	YES	Wang et al	Wang et al
PS003	INCB	Glioblastoma, IDH-wildtype	Glioblastoma, IDH-wildtype	IV	IV	67	M	non-Asian	1	17.07	1	8.66667	No	No	IDHwt	noncodel	NO	NO	NO	YES	YES	YES	YES	YES	Wang et al	Wang et al
PS004	INCB	Glioblastoma, IDH-wildtype	Glioblastoma, IDH-wildtype	IV	IV	50	F	non-Asian	1	27.2	1	5.8	No	No	IDHwt	noncodel	NO	NO	NO	YES	YES	YES	YES	YES	Wang et al	Wang et al
PS005	INCB	Glioblastoma, IDH-wildtype	Glioblastoma, IDH-wildtype	IV	IV	58	F	non-Asian	1	12.8	1	5.2	No	No	IDHwt	noncodel	NO	NO	NO	YES	YES	YES	YES	YES	Wang et al	Wang et al
PS006	INCB	Glioblastoma, IDH-wildtype	Glioblastoma, IDH-wildtype	IV	IV	59	M	non-Asian	1	17.53	1	11.3	No	No	IDHwt	noncodel	NO	NO	NO	YES	YES	YES	YES	YES	Wang et al	Wang et al
PS007	INCB	Glioblastoma, IDH-wildtype	Glioblastoma, IDH-wildtype	IV	IV	69	M	non-Asian	1	21.27	1	11.5	No	Yes	IDHwt	noncodel	NO	NO	NO	YES	YES	YES	YES	YES	Wang et al	Wang et al
PS008	INCB	Glioblastoma, IDH-wildtype	Glioblastoma, IDH-wildtype	IV	IV	46	F	non-Asian	1	15.27	1	10.1	No	No	IDHwt	noncodel	NO	NO	NO	YES	YES	YES	YES	YES	Wang et al	Wang et al
PS009	INCB	Glioblastoma, IDH-mutant	Glioblastoma, IDH-mutant	IV	IV	67	F	non-Asian	1	46.37	1	40.2	No	No	IDHmut	noncodel	NO	NO	NO	YES	YES	YES	YES	YES	Wang et al	Wang et al
PS010	INCB	Glioblastoma, IDH-wildtype	Glioblastoma, IDH-wildtype	IV	IV	50	M	non-Asian	1	22.8	1	16.5333	No	Yes	IDHwt	noncodel	NO	NO	NO	YES	YES	YES	YES	YES	Wang et al	Wang et al
PS011	INCB	Glioblastoma, IDH-wildtype	Glioblastoma, IDH-wildtype	IV	IV	53	M	non-Asian	1	18.3	1	11.5667	No	No	IDHwt	noncodel	NO	NO	NO	YES	YES	YES	NO	NO	Wang et al	Wang et al
PS012	INCB	Glioblastoma, IDH-mutant	Glioblastoma, IDH-mutant	IV	IV	49	M	non-Asian	1	45.17	1	31.8667	No	No	IDHmut	noncodel	NO	NO	NO	YES	YES	YES	YES	YES	Wang et al	Wang et al
PS013	INCB	Glioblastoma, IDH-wildtype	Glioblastoma, IDH-wildtype	IV	IV	67	F	non-Asian	1	25.4	1	12.1667	No	No	IDHwt	noncodel	NO	NO	NO	YES	YES	YES	NO	NO	Wang et al	Wang et al
PS014	INCB	Glioblastoma, IDH-wildtype	Glioblastoma, IDH-wildtype	IV	IV	57	M	non-Asian	1	9.43	1	8	No	No	IDHwt	noncodel	NO	NO	NO	YES	YES	YES	NO	NO	Wang et al	Wang et al
PS015	INCB	Glioblastoma, IDH-wildtype	Glioblastoma, IDH-wildtype	IV	IV	47	M	non-Asian	1	18.6	1	14.9	No	No	IDHwt	noncodel	NO	NO	NO	YES	YES	YES	NO	NO	Wang et al	Wang et al
PS016	INCB	Glioblastoma, IDH-wildtype	Glioblastoma, IDH-wildtype	IV	IV	61	M	non-Asian	1	18.17	1	15.6667	No	No	IDHwt	noncodel	NO	NO	NO	YES	YES	YES	NO	NO	Wang et al	Wang et al
PS017	INCB	Glioblastoma, IDH-wildtype	Glioblastoma, IDH-wildtype	IV	IV	33	F	non-Asian	1	30.2	1	5.8	No	No	IDHwt	noncodel	NO	NO	NO	YES	YES	YES	NO	YES	Wang et al	Wang et al
PS018	INCB	Glioblastoma, IDH-wildtype	Glioblastoma, IDH-wildtype	IV	IV	52	M	non-Asian	1	24.9	1	17.9	No	No	IDHwt	noncodel	NO	NO	NO	YES	YES	YES	NO	YES	Wang et al	Wang et al
PS019	INCB	Glioblastoma, IDH-wildtype	Glioblastoma, IDH-wildtype	IV	IV	48	M	non-Asian	1	18.4	1	8.7	No	No	IDHwt	noncodel	NO	NO	NO	YES	YES	YES	YES	YES	Wang et al	Wang et al
PS020	MD Anderson	Glioblastoma, IDH-wildtype	Glioblastoma, IDH-wildtype	IV	IV	52.5	M	non-Asian	1	40.9	1	32.8	No	Yes	IDHwt	noncodel	NO	NO	NO	YES	YES	YES	YES	YES	Wang et al	Wang et al
PS021	MD Anderson	Glioblastoma, IDH-wildtype	Glioblastoma, IDH-wildtype	IV	IV	44.5	F	non-Asian	1	13.43	1	11.3	No	Yes	IDHwt	noncodel	NO	NO	NO	YES	YES	YES	YES	YES	Wang et al	Wang et al
PS022	MD Anderson	Glioblastoma, IDH-wildtype	Glioblastoma, IDH-wildtype	IV	IV	35	F	non-Asian	1	141.87	1	10.3333	No	Yes	IDHwt	noncodel	NO	NO	NO	YES	YES	YES	YES	YES	Wang et al	Wang et al
PS023	MD Anderson	Glioblastoma, IDH-wildtype	Glioblastoma, IDH-wildtype	IV	IV	64	M	non-Asian	1	18.7	1	11.7333	No	No	IDHwt	noncodel	NO	NO	NO	YES	YES	YES	YES	YES	Wang et al	Wang et al
PS024	MD Anderson	Glioblastoma, IDH-wildtype	Glioblastoma, IDH-wildtype	IV	IV	46.4	M	non-Asian	1	16.67	1	6.53333	No	No	IDHwt	noncodel	NO	NO	NO	YES	YES	YES	YES	YES	Wang et al	Wang et al
PS025	MD Anderson	Glioblastoma, IDH-wildtype	Glioblastoma, IDH-wildtype	IV	IV	67	F	non-Asian	1	4.37	1	0.8	No	No	IDHwt	noncodel	NO	NO	NO	YES	YES	YES	YES	YES	Wang et al	Wang et al
PS026	MD Anderson	Glioblastoma, IDH-wildtype	Glioblastoma, IDH-wildtype	IV	IV	63.7	M	non-Asian	1	18.73	1	16.3333	No	No	IDHwt	noncodel	NO	NO	NO	YES	YES	YES	YES	YES	Wang et al	Wang et al
PS027	MD Anderson	Glioblastoma, IDH-mutant	Glioblastoma, IDH-mutant	IV	IV	62	F	non-Asian	1	38.77	1	8.06667	No	Yes	IDHmut	noncodel	NO	NO	NO	YES	YES	YES	YES	YES	Wang et al	Wang et al
PS028	MD Anderson	Glioblastoma, IDH-wildtype	Glioblastoma, IDH-wildtype	IV	IV	67.1	M	non-Asian	1	13.03	1	5.86667	No	No	IDHwt	noncodel	NO	NO	NO	YES	YES	YES	NO	YES	Wang et al	Wang et al
PS029	MD Anderson	Glioblastoma, IDH-wildtype	Glioblastoma, IDH-wildtype	IV	IV	52.3	M	non-Asian	1	17	1	7.73333	No	No	IDHwt	noncodel	NO	NO	NO	YES	YES	YES	YES	YES	Wang et al	Wang et al
PS030	TCGA-GBM	Glioblastoma, IDH-wildtype	Glioblastoma, IDH-wildtype	IV	IV	63.9	F	non-Asian	1	48.27	1	27.0667	No	No	IDHwt	noncodel	YES	YES	YES	YES	YES	YES	YES	YES	Wang et al	Wang et al
PS031	TCGA-GBM	Glioblastoma, IDH-wildtype	Glioblastoma, IDH-wildtype	IV	IV	68	M	non-Asian	0	12.43	1	5.76667	No	No	IDHwt	noncodel	YES	YES	YES	YES	YES	YES	NO	YES	Wang et al	Wang et al
PS032	TCGA-GBM	Glioblastoma, IDH-wildtype	Glioblastoma, IDH-wildtype	IV	IV	65.9	M	non-Asian	1	13.3	1	3.96667	No	No	IDHwt	noncodel	YES	YES	YES	YES	YES	YES	NO	YES	Wang et al	Wang et al
PS033	TCGA-GBM	Glioblastoma, IDH-wildtype	Glioblastoma, IDH-wildtype	IV	IV	62.5	M	non-Asian	1	10.57	1	7.36667	No	No	IDHwt	noncodel	YES	YES	YES	YES	YES	YES	YES	YES	Wang et al	Wang et al
PS034	TCGA-GBM	Glioblastoma, IDH-wildtype	Glioblastoma, IDH-wildtype	IV	IV	72.8	F	non-Asian	0	7.5	1	2.23333	No	No	IDHwt	noncodel	YES	YES	YES	YES	YES	YES	YES	YES	Wang et al	Wang et al
PS035	TCGA-GBM	Glioblastoma, IDH-wildtype	Glioblastoma, IDH-wildtype	IV	IV	48	M	non-Asian	0	12	1	1.76667	No	No	IDHwt	noncodel	YES	YES	YES	YES	YES	YES	YES	YES	Wang et al	Wang et al
PS036	TCGA-GBM	Glioblastoma, IDH-mutant	Glioblastoma, IDH-mutant	IV	IV	31	M	non-Asian	0	20.1	1	9.33333	No	No	IDHmut	noncodel	YES	YES	YES	YES	YES	YES	NO	YES	Wang et al	Wang et al
PS037	TCGA-GBM	Glioblastoma, IDH-wildtype	Glioblastoma, IDH-wildtype	IV	IV	49.9	M	non-Asian	0	15.3	1	6.86667	No	No	IDHwt	noncodel	NO	NO	NO	YES	YES	YES	NO	YES	Wang et al	Wang et al
PS038	TCGA-GBM	Glioblastoma, IDH-wildtype	Glioblastoma, IDH-wildtype	IV	IV	60.3	F	non-Asian	0	16.17	1	14.9333	No	No	IDHwt	noncodel	YES	YES	YES	YES	YES	YES	YES	YES	Wang et al	Wang et al
PS039	TCGA-GBM	Glioblastoma, IDH-wildtype	Glioblastoma, IDH-wildtype	IV	IV	58.6	F	non-Asian	1	32.47	1	28.9	No	Yes	IDHwt	noncodel	YES	YES	YES	YES	YES	YES	NO	YES	Wang et al	Wang et al
PS040	TCGA-GBM	Glioblastoma, IDH-wildtype	Glioblastoma, IDH-wildtype	IV	IV	48.5	F	non-Asian	1	22.17	1	13.7667	No	No	IDHwt	noncodel	NO	NO	NO	YES	YES	YES	NO	YES	Wang et al	Wang et al
PS041	TCGA-GBM	Glioblastoma, IDH-wildtype	Glioblastoma, IDH-wildtype	IV	IV	51.1	M	non-Asian	1	4.7	1	2.7	No	No	IDHwt	noncodel	YES	YES	YES	YES	YES	YES	NO	YES	Wang et al	Wang et al
PS042	TCGA-GBM	Glioblastoma, IDH-wildtype	Glioblastoma, IDH-wildtype	IV	IV	36	M	non-Asian	1	14.33	1	2.33333	No	No	IDHwt	noncodel	NO	NO	NO	YES	YES	YES	YES	YES	Wang et al	Wang et al
PS043	UCSF	Diffuse Astrocytoma, IDH-mutant	Glioblastoma, IDH-mutant	II	IV	28	M	non-Asian	1	58	1	31	No	Yes	IDHmut	noncodel	NO	NO	NO	YES	YES	YES	NO	NO	Wang et al	Wang et al
PS044	UCSF	Diffuse Astrocytoma, IDH-mutant	Glioblastoma, IDH-mutant	II	IV	39	F	non-Asian	1	74	1	56	No	Yes	IDHmut	noncodel	NO	NO	NO	YES	YES	YES	NO	NO	Wang et al	Wang et al
PS045	UCSF	Diffuse Astrocytoma, IDH-mutant	Glioblastoma, IDH-mutant	II	IV	44	M	non-Asian	0	103	1	40	No	No	IDHmut	noncodel	NO	NO	NO	YES	YES	YES	NO	NO	Wang et al	Wang et al
PS046	UCSF	Diffuse Astrocytoma, IDH-mutant	Glioblastoma, IDH-mutant	II	IV	28	M	non-Asian	0	45	1	35	No	No	IDHmut	noncodel	NO	NO	NO	YES	YES	YES	NO	NO	Wang et al	Wang et al
PS047	UCSF	Diffuse Astrocytoma, IDH-mutant	Glioblastoma, IDH-mutant	II	IV	41	F	non-Asian	1	44	1	25	No	Yes	IDHmut	noncodel	NO	NO	NO	YES	YES	YES	NO	NO	Wang et al	Wang et al
PS048	UCSF	Diffuse Astrocytoma, IDH-mutant	Glioblastoma, IDH-mutant	II	IV	27	M	non-Asian	1	59	0	30	No	No	IDHmut	noncodel	NO	NO	NO	YES	YES	YES	NO	NO	Wang et al	Wang et al
PS049	UCSF	Diffuse Astrocytoma, IDH-mutant	Glioblastoma, IDH-mutant	II	IV	49	M	non-Asian	1	106	0	94	No	Yes	IDHmut	noncodel	NO	NO	NO	YES	YES	YES	NO	NO	Wang et al	Wang et al
PS050	UCSF	Diffuse Astrocytoma, IDH-mutant	Glioblastoma, IDH-mutant	II	IV	27	M	non-Asian	1	35	1	21	No	Yes	IDHmut	noncodel	NO	NO	NO	YES	YES	YES	NO	NO	Wang et al	Wang et al
PS051	UCSF	Diffuse Astrocytoma, IDH-mutant	Glioblastoma, IDH-mutant	II	IV	34	M	Asian	1	109	1	102	No	Yes	IDHmut	noncodel	NO	NO	NO	YES	YES	YES	NO	NO	Wang et al	Wang et al
PS052	UCSF	Diffuse Astrocytoma, IDH-mutant	Glioblastoma, IDH-mutant	II	IV	39	M	Asian	0	42	0	14	No	No	IDHmut	noncodel	NO	NO	NO	YES	YES	YES	NO	NO	Wang et al	Wang et al
PS053	Suzuki	Diffuse Astrocytoma, IDH-mutant	Glioblastoma, IDH-mutant	II	IV	31	M	Asian	0	45	0	45	No	No	IDHmut	noncodel	NO	NO	NO	YES	YES	YES	NO	NO	Wang et al	Wang et al
PS054	Suzuki	Diffuse Astrocytoma, IDH-mutant	Glioblastoma, IDH-mutant	II	IV	23	M	Asian	1	37.8	0	37.8	No	No	IDHmut	noncodel	NO	NO	NO	YES	YES	YES	NO	NO	Wang et al	Wang et al
PS055	Suzuki	Diffuse Astrocytoma, IDH-mutant	Glioblastoma, IDH-mutant	II	IV	48	F	Asian	1	38.2	0	38.2	No	Yes	IDHmut	noncodel	NO	NO	NO	YES	YES	YES	NO	NO	Wang et al	Wang et al
PS056	SMC_old	Glioblastoma, IDH-wildtype	Glioblastoma, IDH-wildtype	IV	IV	42	F	Asian	1	60.6667	0	24.1	No	No	IDHwt	noncodel	NO	NO	NO	YES	YES	YES	YES	YES	Wang et al	Wang et al
PS057	SMC_old	Glioblastoma, IDH-wildtype	Glioblastoma, IDH-wildtype	IV	IV	53	M	Asian	1	57.7667	1	8.6	No	No	IDHwt	noncodel	NO	NO	NO	YES	YES	YES	NO	NO	Wang et al	Wang et al
PS058	SMC_old	Glioblastoma, IDH-wildtype	Glioblastoma, IDH-wildtype	IV	IV	70	F	Asian	1	53.2667	0	37.4667	No	No	IDHwt	noncodel	NO	NO	NO	YES	YES	YES	NO	NO	Wang et al	Wang et al
PS060	SMC_old	Glioblastoma, IDH-wildtype	Glioblastoma, IDH-wildtype	IV	IV	32	M	Asian	1	38.8333	0	14.3	No	No	IDHwt	noncodel	NO	NO	NO	YES	YES	YES	YES	YES	Wang et al	Wang et al
PS061	SMC_old	Glioblastoma, IDH-wildtype	Glioblastoma, IDH-wildtype	IV	IV	48	M	Asian	1	34.8333	1	2.26667	No	No	IDHwt	noncodel	NO	NO	NO	YES	YES	YES	YES	YES	Wang et al	Wang et al
PS062	SMC_old	Glioblastoma, IDH-wildtype	Glioblastoma, IDH-wildtype	IV	IV	24	M	Asian	1	34.2	0	27	No	No	IDHwt	noncodel	NO	NO	NO	YES	YES	YES	NO	NO	Wang et al	Wang et al
PS063	SMC_old	Glioblastoma, IDH-wildtype	Glioblastoma, IDH-wildtype	IV	IV	34	F	Asian	1	32.6667	0	29.6667	No	No	IDHwt	noncodel	NO	NO	NO	YES	YES	YES	YES	YES	Wang et al	Wang et al
PS064	SMC_old	Glioblastoma, IDH-wildtype	Glioblastoma, IDH-wildtype	IV	IV	56	F	Asian	1	42.2667	0	8.83333	No	No	IDHwt	noncodel	NO	NO	NO	YES	YES	YES	YES	YES	Wang et al	Wang et al
PS065	SMC_old	Glioblastoma, IDH-wildtype	Glioblastoma, IDH-wildtype	IV	IV	38	F	Asian	1	25.8	1	14.9333	No	No	IDHwt	noncodel	NO	NO	NO	YES	YES	YES	YES	YES	Wang et al	Wang et al
PS066	SMC_old	Glioblastoma, IDH-wildtype	Glioblastoma, IDH-wildtype	IV	IV	51	M	Asian	1	23.2667	0	14.2333	No	No	IDHwt	noncodel	NO	NO	NO	YES	YES	YES	YES	YES	Wang et al	Wang et al
PS067	SMC_old	Glioblastoma, IDH-wildtype	Glioblastoma, IDH-wildtype	IV	IV	51	M	Asian	1	22.0333	1	6.56667	No	No	IDHwt	noncodel	NO	NO	NO	YES	YES	YES	YES	YES	Wang et al	Wang et al
PS068	SMC_old	Glioblastoma, IDH-wildtype	Glioblastoma, IDH-wildtype	IV	IV	74	M	Asian	1	19.0667	1	15.6333	No	No	IDHwt	noncodel	NO	NO	NO	YES	YES	YES	YES	YES	Wang et al	Wang et al
PS069	SMC_old	Glioblastoma, IDH-wildtype	Glioblastoma, IDH-wildtype	IV	IV	46	F	Asian	1	17.5	1	10.2667	No	No	IDHwt	noncodel	NO	NO	NO	YES	YES	YES	NO	NO	Wang et al	Wang et al
PS070	SMC_old	Glioblastoma, IDH-wildtype	Glioblastoma, IDH-wildtype	IV	IV	72	F	Asian	1	16.6333	0	6.66667	No	No	IDHwt	noncodel	NO	NO	NO	YES	YES	YES	YES	YES	Wang et al	Wang et al
PS071	SMC_old	Glioblastoma, IDH-wildtype	Glioblastoma, IDH-wildtype	IV	IV	65	M	Asian	1	15.5333	1	11.0333	No	No	IDHwt	noncodel	NO	NO	NO	YES	YES	YES	YES	YES	Wang et al	Wang et al
PS072	SMC_old	Glioblastoma, IDH-wildtype	Glioblastoma, IDH-wildtype	IV	IV	74	M	Asian	1	13.8333	1	5.36667	No	No	IDHwt	noncodel	NO	NO	NO	YES	YES	YES	YES	YES	Wang et al	Wang et al
PS073	SMC_old	Glioblastoma, IDH-wildtype	Glioblastoma, IDH-wildtype	IV	IV	66	M	Asian	1	13.3	1	12	No	No	IDHwt	noncodel	NO	NO	NO	YES	YES	YES	NO	NO	Wang et al	Wang et al
PS074	SMC_old	Glioblastoma, IDH-wildtype	Glioblastoma, IDH-wildtype	IV	IV	41	M	Asian	1	11.9667	1	6.86667	No	No	IDHwt	noncodel	NO	NO	NO	YES	YES	YES	YES	YES	Wang et al	Wang et al
PS075	SMC_old	Glioblastoma, IDH-wildtype	Glioblastoma, IDH-wildtype	IV	IV	52	M	Asian	1	7.3	1	5.56667	No	No	IDHwt	noncodel	NO	NO	NO	YES	YES	YES	NO	NO	Wang et al	Wang et al
PS076	SMC_old	Glioblastoma, IDH-mutant	Glioblastoma, IDH-mutant	IV	IV	40	M	Asian	1	57.6	1	2.6	No	No	IDHmut	noncodel	NO	NO	NO	YES	YES	YES	YES	YES	Wang et al	Wang et al
PS078	SMC_old	Glioblastoma, IDH-mutant	Glioblastoma, IDH-mutant	IV	IV	39	M	Asian	1	81.4667	1	28.6333	No	No	IDHmut	noncodel	NO	NO	NO	NO	YES	YES	YES	YES	NA	NA
PS079	SMC_old	Glioblastoma, IDH-wildtype	Glioblastoma, IDH-wildtype	IV	IV	47	M	Asian	1	39.6333	0	19.0667	No	No	IDHwt	noncodel	NO	NO	NO	NO	YES	YES	NO	NO	NA	NA
PS080	SMC_old	Glioblastoma, IDH-wildtype	Glioblastoma, IDH-wildtype	IV	IV	60	M	Asian	1	33.0333	1	20.4	No	No	IDHwt	noncodel	NO	NO	NO	NO	YES	YES	YES	YES	NA	NA
PS081	SMC_old	Glioblastoma, IDH-wildtype	Glioblastoma, IDH-wildtype	IV	IV	58	F	Asian	1	16.9	1	7.13333	No	No	IDHwt	noncodel	NO	NO	NO	NO	YES	YES	YES	YES	NA	NA
PS082	SMC_old	Glioblastoma, IDH-wildtype	Glioblastoma, IDH-wildtype	IV	IV	49	M	Asian	1	10.6333	0	2.6	No	No	IDHwt	noncodel	NO	NO	NO	NO	YES	YES	YES	YES	NA	NA
PS083	SMC_old	Glioblastoma, IDH-wildtype	Glioblastoma, IDH-wildtype	IV	IV	50	M	Asian	1	33.7333	1	15.8333	No	No	IDHwt	noncodel	NO	NO	NO	NO	NO	NO	YES	YES	NA	NA
PS084	SMC_old	Glioblastoma, IDH-mutant	Glioblastoma, IDH-mutant	IV	IV	43	F	Asian	1	33.1	1	20.5	No	Yes	IDHmut	noncodel	NO	NO	NO	NO	NO	NO	YES	YES	NA	NA
PS085	SMC_old	Glioblastoma, IDH-wildtype	Glioblastoma, IDH-wildtype	IV	IV	51	M	Asian	1	32.2333	1	12.9	No	No	IDHwt	noncodel	NO	NO	NO	NO	NO	NO	YES	YES	NA	NA
PS087	SMC_old	Glioblastoma, IDH-wildtype	Glioblastoma, IDH-wildtype	IV	IV	37	F	Asian	1	27.4333	0	18.3333	No	No	IDHwt	noncodel	NO	NO	NO	NO	NO	NO	YES	YES	NA	NA
PS088	SMC_old	Glioblastoma, IDH-wildtype	Glioblastoma, IDH-wildtype	IV	IV	32	F	Asian	1	25.0667	1	11.6333	No	Yes	IDHwt	noncodel	NO	NO	NO	NO	NO	NO	YES	YES	NA	NA
PS089	SMC_old	Glioblastoma, IDH-wildtype	Glioblastoma, IDH-wildtype	IV	IV	41	M	Asian	1	15.2	1	3.46667	No	No	IDHwt	noncodel	NO	NO	NO	NO	NO	NO	YES	YES	NA	NA
PS090	SMC_old	Glioblastoma, IDH-wildtype	Glioblastoma, IDH-wildtype	IV	IV	44	M	Asian	1	12.9333	1	5.16667	No	No	IDHwt	noncodel	NO	NO	NO	NO	NO	NO	YES	YES	NA	NA
PS092	SMC_old	Glioblastoma, IDH-wildtype	Glioblastoma, IDH-wildtype	IV	IV	47	F	Asian	1	10.9667	1	5.96667	No	No	IDHwt	noncodel	NO	NO	NO	NO	NO	NO	YES	YES	NA	NA
PS093	SMC_old	Glioblastoma, IDH-wildtype	Glioblastoma, IDH-wildtype	IV	IV	73	M	Asian	1	8.3	0	7.36667	No	No	IDHwt	noncodel	NO	NO	NO	NO	NO	NO	YES	YES	NA	NA
PS094	SMC_old	Glioblastoma, IDH-mutant	Glioblastoma, IDH-mutant	IV	IV	50	M	Asian	1	18.6	0	8.63333	No	No	IDHmut	noncodel	NO	NO	NO	YES	YES	YES	NO	NO	Wang et al	Wang et al
PS095	SMC_old	Glioblastoma, IDH-wildtype	Glioblastoma, IDH-wildtype	IV	IV	61	F	Asian	1	19.9333	0	9.16667	No	No	IDHwt	noncodel	NO	NO	NO	YES	YES	YES	YES	YES	Wang et al	Wang et al
PS096	SMC_old	Glioblastoma, IDH-wildtype	Glioblastoma, IDH-wildtype	IV	IV	47	M	Asian	1	30	0	2.2	No	No	IDHwt	noncodel	NO	NO	NO	YES	YES	YES	NO	YES	Wang et al	Wang et al
PS097	SMC_old	Glioblastoma, IDH-wildtype	Glioblastoma, IDH-wildtype	IV	IV	61	F	Asian	1	24.1333	0	16.7	No	No	IDHwt	noncodel	NO	NO	NO	YES	YES	YES	NO	NO	Wang et al	Wang et al
PS098	SMC_old	Glioblastoma, IDH-wildtype	Glioblastoma, IDH-wildtype	IV	IV	51	M	Asian	0	20.6667	0	3.13333	No	No	IDHwt	noncodel	NO	NO	NO	YES	YES	YES	NO	NO	Wang et al	Wang et al
PS099	SMC_old	Glioblastoma, IDH-wildtype	Glioblastoma, IDH-wildtype	IV	IV	57	F	Asian	1	19.4	0	3.13333	No	No	IDHwt	noncodel	NO	NO	NO	YES	YES	YES	YES	YES	Wang et al	Wang et al
PS100	SMC_old	Glioblastoma, IDH-wildtype	Glioblastoma, IDH-wildtype	IV	IV	45	M	Asian	1	17.8	1	4.76667	No	No	IDHwt	noncodel	NO	NO	NO	YES	YES	YES	YES	YES	Wang et al	Wang et al
PS101	SMC_old	Glioblastoma, IDH-wildtype	Glioblastoma, IDH-wildtype	IV	IV	63	F	Asian	1	14	1	2.83333	No	No	IDHwt	noncodel	NO	NO	NO	YES	YES	YES	YES	YES	Wang et al	Wang et al
PS102	SMC_old	Glioblastoma, IDH-wildtype	Glioblastoma, IDH-wildtype	IV	IV	69	M	Asian	1	16.4333	1	10.2333	No	No	IDHwt	noncodel	NO	NO	NO	YES	YES	NO	YES	YES	NA	NA
PS103	SMC_old	Glioblastoma, IDH-wildtype	Glioblastoma, IDH-wildtype	IV	IV	55	F	Asian	1	18.5667	1	3.16667	No	No	IDHwt	noncodel	NO	NO	NO	YES	YES	YES	YES	YES	Wang et al	Wang et al
PS104	SMC_old	Glioblastoma, IDH-wildtype	Glioblastoma, IDH-wildtype	IV	IV	54	M	Asian	1	27.6333	0	11.3333	No	No	IDHwt	noncodel	NO	NO	NO	YES	YES	YES	YES	YES	Wang et al	Wang et al
PS105	SMC_old	Glioblastoma, IDH-wildtype	Glioblastoma, IDH-wildtype	IV	IV	55	F	Asian	1	24.3	0	12.9667	No	No	IDHwt	noncodel	NO	NO	NO	YES	YES	YES	YES	NO	Wang et al	Wang et al
PS106	SMC_old	Glioblastoma, IDH-wildtype	Glioblastoma, IDH-wildtype	IV	IV	51	M	Asian	1	13.3667	1	9.53333	No	No	IDHwt	noncodel	NO	NO	NO	YES	YES	YES	YES	YES	Wang et al	Wang et al
PS107	SMC_old	Glioblastoma, IDH-wildtype	Glioblastoma, IDH-wildtype	IV	IV	52	F	Asian	1	15.8	0	7.06667	No	No	IDHwt	noncodel	NO	NO	NO	YES	YES	YES	YES	YES	Wang et al	Wang et al
PS108	SMC_old	Glioblastoma, IDH-wildtype	Glioblastoma, IDH-wildtype	IV	IV	56	F	Asian	1	8.63333	0	4.8	No	No	IDHwt	noncodel	NO	NO	NO	YES	YES	YES	YES	YES	Wang et al	Wang et al
PS109	SMC_old	Glioblastoma, IDH-wildtype	Glioblastoma, IDH-wildtype	IV	IV	51	F	Asian	1	18.6667	1	11.7667	No	No	IDHwt	noncodel	NO	NO	NO	YES	YES	YES	YES	YES	Wang et al	Wang et al
PS110	SMC_old	Glioblastoma, IDH-wildtype	Glioblastoma, IDH-wildtype	IV	IV	49	M	Asian	0	8.2	0	2.36667	No	No	IDHwt	noncodel	NO	NO	NO	YES	YES	YES	YES	YES	Wang et al	Wang et al
PS111	SMC_old	Glioblastoma, IDH-wildtype	Glioblastoma, IDH-wildtype	IV	IV	31	M	Asian	0	14.2667	1	6.36667	No	No	IDHwt	noncodel	NO	NO	NO	NO	NO	NO	YES	YES	NA	NA
PS112	SMC_old	Glioblastoma, IDH-wildtype	Glioblastoma, IDH-wildtype	IV	IV	70	F	Asian	0	10.2667	1	1.43333	No	No	IDHwt	noncodel	NO	NO	NO	NO	NO	NO	YES	YES	NA	NA
PS113	SMC_old	Glioblastoma, IDH-wildtype	Glioblastoma, IDH-wildtype	IV	IV	51	F	Asian	1	18.4667	1	3.13333	No	No	IDHwt	noncodel	NO	NO	NO	NO	NO	NO	YES	YES	NA	NA
PS114	SMC_old	Glioblastoma, IDH-mutant	Glioblastoma, IDH-mutant	IV	IV	45	F	Asian	1	74.6333	0	8.66667	No	No	IDHmut	noncodel	NO	NO	NO	YES	YES	NO	YES	YES	NA	NA
PS115	Tiantan	Oligodendroglioma, IDH-mutant and 1p/19q-codeleted	Oligodendroglioma, IDH-mutant and 1p/19q-codeleted	II	II	30	M	Asian	1	78.3	1	50.4	No	No	IDHmut	codel	NO	NO	NO	YES	YES	YES	NO	YES	SAVI	CNVkit
PS116	Tiantan	Diffuse Astrocytoma, IDH-mutant	Glioblastoma, IDH-mutant	II	IV	59	M	Asian	1	94.2667	1	76.8	No	No	IDHmut	noncodel	NO	NO	NO	YES	YES	YES	NO	NO	SAVI	CNVkit
PS117	Tiantan	Glioblastoma, IDH-wildtype	Glioblastoma, IDH-wildtype	IV	IV	37	M	Asian	1	14	1	8.4	No	No	IDHwt	noncodel	NO	NO	NO	NO	NO	NO	YES	YES	NA	NA
PS118	Tiantan	Diffuse Astrocytoma, IDH-mutant	Glioblastoma, IDH-mutant	II	IV	49	M	Asian	1	50.2333	1	46.8	No	No	IDHmut	noncodel	NO	NO	NO	YES	YES	YES	YES	YES	SAVI	CNVkit
PS119	Tiantan	Diffuse Astrocytoma, IDH-wildtype	Diffuse Astrocytoma, IDH-wildtype	II	II	44	F	Asian	1	129.767	0	36	No	No	IDHwt	noncodel	NO	NO	NO	YES	YES	YES	NO	NO	SAVI	CNVkit
PS120	Tiantan	Diffuse Astrocytoma, IDH-mutant	Glioblastoma, IDH-mutant	II	IV	34	F	Asian	1	48.5	1	39.6	No	No	IDHmut	noncodel	NO	NO	NO	YES	YES	YES	YES	NO	SAVI	CNVkit
PS121	Tiantan	Glioblastoma, IDH-wildtype	Glioblastoma, IDH-wildtype	IV	IV	35	M	Asian	1	19.0333	1	9.6	No	Yes	IDHwt	noncodel	NO	NO	NO	YES	YES	YES	NO	YES	SAVI	CNVkit
PS122	Tiantan	Glioblastoma, IDH-wildtype	Glioblastoma, IDH-wildtype	IV	IV	49	M	Asian	1	16.1333	1	10.8	No	No	IDHwt	noncodel	NO	NO	NO	YES	YES	YES	YES	YES	SAVI	CNVkit
PS123	Tiantan	Glioblastoma, IDH-wildtype	Glioblastoma, IDH-wildtype	IV	IV	60	M	Asian	1	26.9667	1	20.4	No	No	IDHwt	noncodel	NO	NO	NO	YES	YES	YES	YES	YES	SAVI	CNVkit
PS124	Tiantan	Anaplastic Astrocytoma, IDH-mutant	Glioblastoma, IDH-mutant	III	IV	33	M	Asian	0	27.3333	1	12	No	No	IDHmut	noncodel	NO	NO	NO	YES	YES	YES	YES	YES	SAVI	CNVkit
PS125	Tiantan	Glioblastoma, IDH-mutant	Glioblastoma, IDH-mutant	IV	IV	37	F	Asian	1	19.5	1	18	No	No	IDHmut	noncodel	NO	NO	NO	YES	YES	YES	YES	YES	SAVI	CNVkit
PS126	Tiantan	Diffuse Astrocytoma, IDH-mutant	Glioblastoma, IDH-mutant	II	IV	48	F	Asian	1	87.8333	1	80.4	No	No	IDHmut	noncodel	NO	NO	NO	NO	NO	NO	YES	YES	NA	NA
PS127	Tiantan	Oligodendroglioma, IDH-mutant and 1p/19q-codeleted	Anaplastic Oligodendroglioma, IDH-mutant and 1p/19q-codeleted	II	IV	45	F	Asian	1	87.7667	1	62.4	No	No	IDHmut	codel	NO	NO	NO	YES	YES	YES	YES	YES	SAVI	CNVkit
PS128	Tiantan	Oligodendroglioma, IDH-mutant and 1p/19q-codeleted	Anaplastic Oligodendroglioma, IDH-mutant and 1p/19q-codeleted	II	III	46	M	Asian	1	140.067	1	87.6	No	No	IDHmut	codel	NO	NO	NO	YES	YES	YES	NO	YES	SAVI	CNVkit
PS129	Tiantan	Diffuse Astrocytoma, IDH-mutant	Glioblastoma, IDH-mutant	II	IV	46	M	Asian	1	82.9333	1	73.2	No	No	IDHmut	noncodel	NO	NO	NO	YES	YES	YES	NO	YES	SAVI	CNVkit
PS130	Tiantan	Glioblastoma, IDH-mutant	Glioblastoma, IDH-mutant	IV	IV	31	M	Asian	1	17.7667	1	12	No	No	IDHmut	noncodel	NO	NO	NO	YES	YES	YES	YES	YES	SAVI	CNVkit
PS131	Tiantan	Glioblastoma, IDH-wildtype	Glioblastoma, IDH-wildtype	IV	IV	24	M	Asian	1	67.1	1	24	No	No	IDHwt	noncodel	NO	NO	NO	YES	YES	YES	NO	YES	SAVI	CNVkit
PS132	Tiantan	Diffuse Astrocytoma, IDH-mutant	Glioblastoma, IDH-mutant	II	IV	43	F	Asian	1	57.5	1	46.8	No	No	IDHmut	noncodel	YES	YES	YES	YES	YES	YES	YES	YES	SAVI	CNVkit
PS133	Tiantan	Diffuse Astrocytoma, IDH-mutant	Anaplastic Astrocytoma, IDH-mutant	II	III	38	M	Asian	1	59.7667	1	27.6	No	No	IDHmut	noncodel	YES	YES	YES	NO	NO	NO	YES	YES	SAVI	CNVkit
PS134	Tiantan	Diffuse Astrocytoma, IDH-mutant	Diffuse Astrocytoma, IDH-mutant	II	III	30	F	Asian	1	62.5667	1	26.4	No	No	IDHmut	noncodel	YES	YES	YES	NO	NO	NO	NO	YES	NA	NA
PS135	Tiantan	Glioblastoma, IDH-wildtype	Glioblastoma, IDH-wildtype	IV	IV	67	M	Asian	1	34.0667	1	22.8	No	No	IDHwt	noncodel	YES	YES	YES	NO	NO	NO	YES	YES	SAVI	CNVkit
PS136	Tiantan	Diffuse Astrocytoma, IDH-mutant	Glioblastoma, IDH-mutant	II	IV	54	M	Asian	0	80.3	1	21.6	No	No	IDHmut	noncodel	NO	NO	NO	NO	NO	NO	YES	YES	NA	NA
PS137	Tiantan	Glioblastoma, IDH-wildtype	Glioblastoma, IDH-wildtype	IV	IV	44	F	Asian	1	22.6333	1	15.6	No	Yes	IDHwt	noncodel	YES	YES	YES	NO	NO	NO	YES	YES	SAVI	CNVkit
PS138	Tiantan	Glioblastoma, IDH-wildtype	Glioblastoma, IDH-wildtype	IV	IV	29	F	Asian	1	27.5	1	21.6	No	Yes	IDHwt	noncodel	YES	YES	YES	NO	NO	NO	YES	YES	SAVI	CNVkit
PS139	Tiantan	Oligodendroglioma, IDH-mutant and 1p/19q-codeleted	Oligodendroglioma, IDH-mutant and 1p/19q-codeleted	II	IV	37	M	Asian	1	100.167	1	NA	No	No	IDHmut	codel	YES	YES	YES	NO	NO	NO	YES	YES	NA	NA
PS140	Tiantan	Glioblastoma, IDH-wildtype	Glioblastoma, IDH-wildtype	IV	IV	47	F	Asian	1	41.2	1	14.4	No	No	IDHwt	noncodel	YES	YES	YES	NO	NO	NO	YES	YES	SAVI	CNVkit
PS141	Tiantan	Oligodendroglioma, IDH-mutant and 1p/19q-codeleted	Anaplastic Oligodendroglioma, IDH-mutant and 1p/19q-codeleted	II	IV	46	M	Asian	1	94.4	1	NA	No	No	IDHmut	codel	NO	NO	NO	NO	NO	NO	YES	YES	NA	NA
PS142	Tiantan	Diffuse Astrocytoma, IDH-mutant	Anaplastic Astrocytoma, IDH-mutant	II	III	41	F	Asian	NA	29.3333	1	NA	No	No	IDHmut	noncodel	NO	NO	NO	NO	NO	NO	YES	YES	NA	NA
PS143	Tiantan	Anaplastic Astrocytoma, IDH-wildtype	Glioblastoma, IDH-wildtype	III	IV	56	M	Asian	1	50.1	1	12	No	Yes	IDHwt	noncodel	YES	YES	YES	NO	NO	NO	YES	YES	SAVI	CNVkit
PS144	Tiantan	Diffuse Astrocytoma, IDH-mutant	Glioblastoma, IDH-mutant	II	IV	32	M	Asian	1	58.8333	1	28.8	No	No	IDHmut	noncodel	YES	YES	YES	NO	NO	NO	YES	YES	SAVI	CNVkit
PS145	Tiantan	Oligodendroglioma, IDH-mutant and 1p/19q-codeleted	Anaplastic Oligodendroglioma, IDH-mutant and 1p/19q-codeleted	II	IV	36	M	Asian	1	113.533	1	NA	No	No	IDHmut	codel	YES	YES	YES	NO	NO	NO	NO	YES	NA	NA
PS146	Tiantan	Anaplastic Astrocytoma, IDH-wildtype	Glioblastoma, IDH-wildtype	III	IV	29	F	Asian	1	15.7	1	14.4	No	Yes	IDHwt	noncodel	YES	YES	YES	NO	NO	NO	YES	YES	SAVI	CNVkit
PS147	Tiantan	Diffuse Astrocytoma, IDH-mutant	Diffuse Astrocytoma, IDH-mutant	II	IV	63	M	Asian	1	122.867	1	NA	No	No	IDHmut	noncodel	YES	YES	YES	NO	NO	NO	YES	YES	NA	NA
PS148	Tiantan	Oligodendroglioma, IDH-mutant and 1p/19q-codeleted	Anaplastic Oligodendroglioma, IDH-mutant and 1p/19q-codeleted	II	IV	41	M	Asian	1	85.0667	1	NA	No	No	IDHmut	codel	YES	YES	YES	NO	NO	NO	YES	YES	SAVI	CNVkit
PS149	Tiantan	Anaplastic Astrocytoma, IDH-mutant	Glioblastoma, IDH-mutant	III	IV	46	M	Asian	1	53.7	1	37.2	No	No	IDHmut	noncodel	YES	YES	YES	NO	NO	NO	YES	YES	SAVI	CNVkit
PS150	Tiantan	Oligodendroglioma, IDH-mutant and 1p/19q-codeleted	Anaplastic Oligodendroglioma, IDH-mutant and 1p/19q-codeleted	II	IV	51	M	Asian	1	83.7	1	NA	No	No	IDHmut	codel	YES	YES	YES	NO	NO	NO	YES	YES	SAVI	CNVkit
PS151	Tiantan	Diffuse Astrocytoma, IDH-mutant	Glioblastoma, IDH-mutant	II	IV	27	M	Asian	1	36.7667	1	25.2	No	No	IDHmut	noncodel	YES	YES	YES	NO	NO	NO	YES	YES	SAVI	CNVkit
PS152	Tiantan	Diffuse Astrocytoma, IDH-mutant	Anaplastic Astrocytoma, IDH-mutant	II	III	38	M	Asian	1	42.8667	1	38.4	No	No	IDHmut	noncodel	YES	YES	YES	NO	NO	NO	YES	YES	SAVI	CNVkit
PS153	Tiantan	Anaplastic Astrocytoma, IDH-mutant	Glioblastoma, IDH-mutant	III	IV	44	M	Asian	1	86.6	1	55.2	No	No	IDHmut	noncodel	NO	NO	NO	NO	NO	NO	YES	YES	NA	NA
PS154	Tiantan	Diffuse Astrocytoma, IDH-mutant	Anaplastic Astrocytoma, IDH-mutant	II	III	43	M	Asian	1	165.2	0	26.4	No	No	IDHmut	noncodel	YES	YES	YES	NO	NO	NO	NO	YES	NA	NA
PS155	Tiantan	Anaplastic Astrocytoma, IDH-mutant	Glioblastoma, IDH-mutant	III	IV	51	F	Asian	NA	33.6	1	18	No	No	IDHmut	noncodel	NO	NO	NO	NO	NO	NO	YES	YES	NA	NA
PS156	Tiantan	Diffuse Astrocytoma, IDH-mutant	Glioblastoma, IDH-mutant	II	IV	52	M	Asian	1	41.7667	1	10.8	No	No	IDHmut	noncodel	NO	NO	NO	NO	NO	NO	YES	YES	NA	NA
PS157	Tiantan	Glioblastoma, IDH-mutant	Glioblastoma, IDH-mutant	IV	IV	38	M	Asian	1	45.1	1	11	No	Yes	IDHmut	noncodel	YES	YES	YES	NO	NO	NO	YES	YES	SAVI	CNVkit
PS158	Tiantan	Anaplastic Astrocytoma, IDH-wildtype	Anaplastic Astrocytoma, IDH-wildtype	III	III	51	F	Asian	1	78.2333	1	15.63	No	No	IDHwt	noncodel	NO	NO	NO	NO	YES	NO	YES	YES	NA	NA
PS159	Tiantan	Diffuse Astrocytoma, IDH-mutant	Diffuse Astrocytoma, IDH-mutant	II	II	25	M	Asian	NA	110.5	0	39.63	No	No	IDHmut	noncodel	NO	NO	NO	NO	NO	NO	YES	YES	NA	NA
PS160	Tiantan	Glioblastoma, IDH-wildtype	Glioblastoma, IDH-wildtype	IV	IV	61	F	Asian	1	18.9	1	8.4	No	No	IDHwt	noncodel	NO	NO	NO	NO	NO	NO	YES	YES	NA	NA
PS161	Tiantan	Glioblastoma, IDH-wildtype	Glioblastoma, IDH-wildtype	IV	IV	50	F	Asian	1	20.1333	1	18.93	No	No	IDHwt	noncodel	NO	NO	NO	NO	NO	NO	YES	YES	NA	NA
PS162	Tiantan	Glioblastoma, IDH-wildtype	Glioblastoma, IDH-wildtype	IV	IV	46	M	Asian	1	12.7	1	7.17	No	No	IDHwt	noncodel	NO	NO	NO	NO	NO	NO	YES	YES	NA	NA
PS163	Tiantan	Glioblastoma, IDH-wildtype	Glioblastoma, IDH-wildtype	IV	IV	45	F	Asian	1	13.3667	1	7.2	No	No	IDHwt	noncodel	NO	NO	NO	NO	NO	NO	YES	YES	NA	NA
PS164	Tiantan	Glioblastoma, IDH-wildtype	Glioblastoma, IDH-wildtype	IV	IV	40	M	Asian	1	26.8333	1	11.93	No	No	IDHwt	noncodel	NO	YES	YES	NO	YES	NO	YES	YES	NA	NA
PS165	Tiantan	Glioblastoma, IDH-wildtype	Glioblastoma, IDH-wildtype	IV	IV	49	F	Asian	NA	16.6667	1	12.6	No	No	IDHwt	noncodel	NO	NO	NO	NO	NO	NO	YES	YES	NA	NA
PS166	Tiantan	Anaplastic Astrocytoma, IDH-mutant	Glioblastoma, IDH-mutant	III	IV	43	M	Asian	1	68.9	1	52.3	No	No	IDHmut	noncodel	NO	NO	NO	YES	YES	NO	YES	YES	NA	NA
PS167	Tiantan	Oligodendroglioma, IDH-mutant and 1p/19q-codeleted	Anaplastic Oligodendroglioma, IDH-mutant and 1p/19q-codeleted	II	III	54	M	Asian	1	242.5	1	46.47	No	No	IDHmut	codel	NO	NO	NO	NO	NO	NO	YES	YES	NA	NA
PS168	Tiantan	Glioblastoma, IDH-wildtype	Glioblastoma, IDH-wildtype	IV	IV	65	F	Asian	1	43.2667	1	17.87	No	No	IDHwt	noncodel	NO	NO	NO	NO	YES	NO	YES	YES	NA	NA
PS169	Tiantan	Diffuse Astrocytoma, IDH-mutant	Anaplastic Astrocytoma, IDH-mutant	II	III	20	M	Asian	1	51.1333	1	32.77	No	No	IDHmut	noncodel	NO	NO	NO	NO	NO	NO	YES	YES	NA	NA
PS170	Tiantan	Glioblastoma, IDH-wildtype	Glioblastoma, IDH-wildtype	IV	IV	50	M	Asian	1	79.1	1	61.73	No	No	IDHwt	noncodel	NO	NO	NO	NO	NO	NO	YES	YES	NA	NA
PS171	Tiantan	Glioblastoma, IDH-wildtype	Glioblastoma, IDH-wildtype	IV	IV	42	M	Asian	1	15.6667	1	11.93	No	No	IDHwt	noncodel	NO	NO	NO	NO	NO	NO	YES	YES	NA	NA
PS172	Tiantan	Anaplastic Astrocytoma, IDH-mutant	Anaplastic Astrocytoma, IDH-mutant	III	III	39	F	Asian	1	51.1	1	19.87	No	No	IDHmut	noncodel	NO	NO	NO	NO	NO	NO	YES	YES	NA	NA
PS173	Tiantan	Anaplastic Oligodendroglioma, IDH-mutant and 1p/19q-codeleted	Anaplastic Oligodendroglioma, IDH-mutant and 1p/19q-codeleted	III	IV	38	M	Asian	0	42.1667	1	38.47	No	No	IDHmut	codel	NO	NO	NO	NO	NO	YES	YES	YES	NA	NA
PS174	Tiantan	Glioblastoma, IDH-mutant	Glioblastoma, IDH-mutant	IV	IV	45	F	Asian	1	13.8	1	10.83	No	No	IDHmut	noncodel	YES	YES	YES	NO	NO	NO	YES	YES	NA	NA
PS175	Tiantan	Glioblastoma, IDH-wildtype	Glioblastoma, IDH-wildtype	IV	IV	24	M	Asian	1	32.9667	1	6.27	No	No	IDHwt	noncodel	NO	NO	NO	NO	NO	NO	YES	YES	NA	NA
PS176	Tiantan	Glioblastoma, IDH-wildtype	Glioblastoma, IDH-wildtype	IV	IV	55	M	Asian	1	15.3333	1	10.73	No	No	IDHwt	noncodel	NO	NO	NO	NO	NO	NO	YES	YES	NA	NA
PS177	Tiantan	Glioblastoma, IDH-mutant	Glioblastoma, IDH-mutant	IV	IV	33	F	Asian	1	39.6333	1	NA	No	No	IDHmut	noncodel	NO	NO	NO	NO	NO	NO	YES	YES	NA	NA
PS178	Tiantan	Diffuse Astrocytoma, IDH-mutant	Glioblastoma, IDH-mutant	II	IV	26	M	Asian	1	28.6667	1	17	No	No	IDHmut	noncodel	NO	NO	NO	YES	YES	YES	YES	YES	NA	NA
PS179	Tiantan	Glioblastoma, IDH-mutant	Glioblastoma, IDH-mutant	IV	IV	60	M	Asian	1	23.1333	1	17.93	No	No	IDHmut	noncodel	NO	NO	NO	NO	NO	NO	YES	YES	NA	NA
PS180	Tiantan	Anaplastic Oligodendroglioma, IDH-mutant and 1p/19q-codeleted	Anaplastic Oligodendroglioma, IDH-mutant and 1p/19q-codeleted	III	III	34	M	Asian	1	98.3	0	50.9	No	No	IDHmut	codel	NO	NO	NO	NO	NO	NO	YES	YES	NA	NA
PS181	Tiantan	Glioblastoma, IDH-wildtype	Glioblastoma, IDH-wildtype	IV	IV	15	M	Asian	1	62.5333	0	22.23	No	Yes	IDHwt	noncodel	NO	NO	NO	NO	NO	NO	YES	YES	NA	NA
PS182	Tiantan	Diffuse Astrocytoma, IDH-mutant	Glioblastoma, IDH-mutant	II	IV	38	M	Asian	1	19.8667	1	15.23	No	Yes	IDHmut	noncodel	NO	NO	NO	YES	NO	YES	YES	YES	NA	NA
PS184	Tiantan	Diffuse Astrocytoma, IDH-mutant	Glioblastoma, IDH-mutant	II	IV	59	M	Asian	1	142.6	0	112	No	No	IDHmut	noncodel	NO	NO	NO	NO	NO	NO	YES	YES	NA	NA
PS185	Tiantan	Oligodendroglioma, IDH-mutant and 1p/19q-codeleted	Anaplastic Oligodendroglioma, IDH-mutant and 1p/19q-codeleted	II	III	47	F	Asian	1	109.967	1	77.4333	No	No	IDHmut	codel	NO	NO	NO	NO	NO	NO	YES	YES	NA	NA
PS186	Tiantan	Diffuse Astrocytoma, IDH-mutant	Glioblastoma, IDH-mutant	II	IV	29	F	Asian	1	107.967	1	90.7	No	No	IDHmut	noncodel	NO	NO	NO	NO	NO	NO	YES	YES	NA	NA
PS187	Tiantan	Glioblastoma, IDH-wildtype	Glioblastoma, IDH-wildtype	IV	IV	43	M	Asian	1	17.3	1	9.7	No	No	IDHwt	noncodel	NO	NO	NO	NO	NO	NO	YES	YES	NA	NA
PS188	Tiantan	Diffuse Astrocytoma, IDH-mutant	Glioblastoma, IDH-mutant	II	IV	44	F	Asian	1	103.567	1	88.9333	No	No	IDHmut	noncodel	NO	NO	NO	NO	NO	NO	YES	YES	NA	NA
PS189	Tiantan	Glioblastoma, IDH-wildtype	Glioblastoma, IDH-wildtype	IV	IV	67	M	Asian	1	102.467	1	29.9	No	No	IDHwt	noncodel	NO	NO	NO	NO	NO	NO	YES	YES	NA	NA
PS190	Tiantan	Glioblastoma, IDH-mutant	Glioblastoma, IDH-mutant	IV	IV	46	M	Asian	1	27.0667	1	NA	No	Yes	IDHmut	noncodel	NO	NO	NO	NO	NO	NO	YES	YES	NA	NA
PS191	UCSF	Diffuse Astrocytoma, IDH-mutant	Anaplastic Astrocytoma, IDH-mutant	II	III	32.2	F	non-Asian	0	5	0	74	No	No	IDHmut	noncodel	NO	NO	NO	YES	YES	YES	NO	NO	Barthel et al 19	Barthel et al 19
PS192	UCSF	Diffuse Astrocytoma, IDH-mutant	Anaplastic Astrocytoma, IDH-mutant	II	III	23	M	non-Asian	1	61	1	15	No	No	IDHmut	noncodel	NO	NO	NO	YES	YES	YES	NO	NO	Barthel et al 19	Barthel et al 19
PS193	UCSF	Diffuse Astrocytoma, IDH-mutant	Diffuse Astrocytoma, IDH-mutant	II	II	24.7	M	non-Asian	1	87	1	32	No	No	IDHmut	noncodel	NO	NO	NO	YES	YES	YES	NO	NO	Barthel et al 19	Barthel et al 19
PS194	UCSF	Diffuse Astrocytoma, IDH-mutant	Diffuse Astrocytoma, IDH-mutant	II	II	38.8	M	non-Asian	0	148	1	105	No	No	IDHmut	noncodel	NO	NO	NO	YES	YES	YES	NO	NO	Barthel et al 19	Barthel et al 19
PS195	UCSF	Diffuse Astrocytoma, IDH-mutant	Diffuse Astrocytoma, IDH-mutant	II	II	41	F	non-Asian	1	186	1	132	No	No	IDHmut	noncodel	NO	NO	NO	YES	YES	YES	NO	NO	Barthel et al 19	Barthel et al 19
PS196	UCSF	Diffuse Astrocytoma, IDH-mutant	Anaplastic Astrocytoma, IDH-mutant	II	III	36.4	M	non-Asian	0	82	0	17	No	No	IDHmut	noncodel	NO	NO	NO	YES	YES	YES	NO	NO	Barthel et al 19	Barthel et al 19
PS197	UCSF	Diffuse Astrocytoma, IDH-mutant	Diffuse Astrocytoma, IDH-mutant	II	II	25.8	M	non-Asian	0	106	1	21	No	No	IDHmut	noncodel	NO	NO	NO	YES	YES	YES	NO	NO	Barthel et al 19	Barthel et al 19
PS198	UCSF	Oligodendroglioma, IDH-mutant and 1p/19q-codeleted	Oligodendroglioma, IDH-mutant and 1p/19q-codeleted	II	II	47.9	F	non-Asian	0	143	0	119	No	No	IDHmut	codel	NO	NO	NO	YES	YES	YES	NO	NO	Barthel et al 19	Barthel et al 19
PS199	UCSF	Diffuse Astrocytoma, IDH-mutant	Diffuse Astrocytoma, IDH-mutant	II	II	35.4	F	non-Asian	0	38	1	5	No	No	IDHmut	noncodel	NO	NO	NO	YES	YES	YES	NO	NO	Barthel et al 19	Barthel et al 19
PS200	UCSF	Diffuse Astrocytoma, IDH-mutant	Diffuse Astrocytoma, IDH-mutant	II	II	37.3	F	Asian	0	47	0	15	No	No	IDHmut	noncodel	NO	NO	NO	YES	YES	YES	NO	NO	Barthel et al 19	Barthel et al 19
PS201	UCSF	Diffuse Astrocytoma, IDH-mutant	Diffuse Astrocytoma, IDH-mutant	II	II	57	M	Asian	0	54	0	12	No	No	IDHmut	noncodel	NO	NO	NO	YES	YES	YES	NO	NO	Barthel et al 19	Barthel et al 19
PS202	UCSF	Diffuse Astrocytoma, IDH-mutant	Anaplastic Astrocytoma, IDH-mutant	II	III	37.1	M	Asian	0	137	0	85	No	No	IDHmut	noncodel	NO	NO	NO	YES	YES	YES	NO	NO	Barthel et al 19	Barthel et al 19
PS203	UCSF	Diffuse Astrocytoma, IDH-mutant	Anaplastic Astrocytoma, IDH-mutant	II	III	56.8	M	Asian	0	109	1	57	No	No	IDHmut	noncodel	NO	NO	NO	YES	YES	YES	NO	NO	Barthel et al 19	Barthel et al 19
PS204	Suzuki	Oligodendroglioma, IDH-mutant and 1p/19q-codeleted	Anaplastic Oligodendroglioma, IDH-mutant and 1p/19q-codeleted	II	III	35.3	M	Asian	0	NA	NA	39.9	No	No	IDHmut	codel	NO	NO	NO	YES	YES	YES	NO	NO	NA	NA
PS205	Suzuki	Oligodendroglioma, IDH-mutant and 1p/19q-codeleted	Oligodendroglioma, IDH-mutant and 1p/19q-codeleted	II	II	38.8	M	Asian	0	NA	NA	33.5	No	No	IDHmut	codel	NO	NO	NO	YES	YES	YES	NO	NO	NA	NA
PS206	Suzuki	Oligodendroglioma, IDH-mutant and 1p/19q-codeleted	Oligodendroglioma, IDH-mutant and 1p/19q-codeleted	II	II	57.2	M	Asian	0	NA	NA	26.1	No	No	IDHmut	codel	NO	NO	NO	YES	YES	YES	NO	NO	NA	NA
PS208	Suzuki	Oligodendroglioma, IDH-mutant and 1p/19q-codeleted	Oligodendroglioma, IDH-mutant and 1p/19q-codeleted	II	II	49.2	M	Asian	0	NA	NA	61.8	No	No	IDHmut	codel	NO	NO	NO	YES	YES	YES	NO	NO	NA	NA
PS209	Suzuki	Oligodendroglioma, IDH-mutant and 1p/19q-codeleted	Oligodendroglioma, IDH-mutant and 1p/19q-codeleted	II	II	38	M	Asian	0	NA	NA	48.2	No	No	IDHmut	codel	NO	NO	NO	YES	YES	YES	NO	NO	NA	NA
PS210	Suzuki	Diffuse Astrocytoma, IDH-mutant	Anaplastic Astrocytoma, IDH-mutant	II	III	42	M	Asian	0	NA	NA	24.3	No	No	IDHmut	noncodel	NO	NO	NO	YES	YES	YES	NO	NO	NA	NA
PS211	Yale	Diffuse Astrocytoma, IDH-mutant	Diffuse Astrocytoma, IDH-mutant	II	II	46.6667	M	non-Asian	0	NA	NA	32	No	No	IDHmut	noncodel	NO	NO	NO	YES	YES	YES	NO	NO	Bai et al 16	NA
PS212	Yale	Oligodendroglioma, IDH-mutant and 1p/19q-codeleted	Anaplastic Oligodendroglioma, IDH-mutant and 1p/19q-codeleted	II	III	NA	F	non-Asian	NA	NA	NA	NA	No	No	IDHmut	codel	NO	NO	NO	YES	YES	YES	NO	NO	Bai et al 16	NA
PS213	Yale	Diffuse Astrocytoma, IDH-mutant	Anaplastic Astrocytoma, IDH-mutant	II	III	NA	M	non-Asian	NA	NA	NA	NA	No	No	IDHmut	noncodel	NO	NO	NO	YES	YES	YES	NO	NO	Bai et al 16	NA
PS214	Yale	Anaplastic Astrocytoma, IDH-mutant	Glioblastoma, IDH-mutant	III	IV	43.05	M	non-Asian	0	NA	NA	51	No	No	IDHmut	noncodel	NO	NO	NO	YES	YES	YES	NO	NO	Bai et al 16	NA
PS215	Yale	Diffuse Astrocytoma, IDH-mutant	Glioblastoma, IDH-mutant	II	IV	28.2333	M	non-Asian	1	NA	NA	34	No	Yes	IDHmut	noncodel	NO	NO	NO	YES	YES	YES	NO	NO	Bai et al 16	NA
PS216	Yale	Diffuse Astrocytoma, IDH-mutant	Glioblastoma, IDH-mutant	II	IV	50.05	M	non-Asian	0	NA	NA	39	No	No	IDHmut	noncodel	NO	NO	NO	YES	YES	YES	NO	NO	Bai et al 16	NA
PS217	Yale	Diffuse Astrocytoma, IDH-mutant	Anaplastic Astrocytoma, IDH-mutant	II	III	58	M	non-Asian	0	NA	NA	114	No	No	IDHmut	noncodel	NO	NO	NO	YES	YES	YES	NO	NO	Bai et al 16	NA
PS218	Yale	Diffuse Astrocytoma, IDH-mutant	Glioblastoma, IDH-mutant	II	IV	35.8667	M	non-Asian	0	NA	NA	32	No	No	IDHmut	noncodel	NO	NO	NO	YES	YES	YES	NO	NO	Bai et al 16	NA
PS219	Yale	Diffuse Astrocytoma, IDH-mutant	Glioblastoma, IDH-mutant	II	IV	35	F	non-Asian	0	NA	NA	18	No	No	IDHmut	noncodel	NO	NO	NO	YES	YES	YES	NO	NO	Bai et al 16	NA
PS220	Yale	Diffuse Astrocytoma, IDH-mutant	Anaplastic Astrocytoma, IDH-mutant	II	III	50.3	F	non-Asian	0	NA	NA	66	No	No	IDHmut	noncodel	NO	NO	NO	YES	YES	YES	NO	NO	Bai et al 16	NA
PS221	Yale	Oligodendroglioma, IDH-mutant and 1p/19q-codeleted	Anaplastic Oligodendroglioma, IDH-mutant and 1p/19q-codeleted	II	III	45.7333	M	non-Asian	0	NA	NA	94	No	No	IDHmut	codel	NO	NO	NO	YES	YES	YES	NO	NO	Bai et al 16	NA
PS222	Yale	Diffuse Astrocytoma, IDH-mutant	Glioblastoma, IDH-mutant	II	IV	38.9667	M	non-Asian	0	NA	NA	44	No	No	IDHmut	noncodel	NO	NO	NO	YES	YES	YES	NO	NO	Bai et al 16	NA
PS223	Yale	Diffuse Astrocytoma, IDH-mutant	Glioblastoma, IDH-mutant	II	IV	46.55	M	non-Asian	0	NA	NA	45	No	No	IDHmut	noncodel	NO	NO	NO	YES	YES	YES	NO	NO	Bai et al 16	NA
PS224	Yale	Diffuse Astrocytoma, IDH-mutant	Diffuse Astrocytoma, IDH-mutant	II	II	25.35	M	non-Asian	0	NA	NA	51	No	No	IDHmut	noncodel	NO	NO	NO	YES	YES	YES	NO	NO	Bai et al 16	NA
PS225	Yale	Diffuse Astrocytoma, IDH-mutant	Glioblastoma, IDH-mutant	II	IV	44.1167	M	non-Asian	0	NA	NA	71	No	No	IDHmut	noncodel	NO	NO	NO	YES	YES	YES	NO	NO	Bai et al 16	NA
PS226	Yale	Anaplastic Astrocytoma, IDH-mutant	Glioblastoma, IDH-mutant	III	IV	39.7667	F	non-Asian	0	NA	NA	38	No	No	IDHmut	noncodel	NO	NO	NO	YES	YES	YES	NO	NO	Bai et al 16	NA
PS227	Yale	Diffuse Astrocytoma, IDH-mutant	Anaplastic Astrocytoma, IDH-mutant	II	III	32.2667	M	non-Asian	0	NA	NA	80	No	No	IDHmut	noncodel	NO	NO	NO	YES	YES	YES	NO	NO	Bai et al 16	NA
PS228	Yale	Diffuse Astrocytoma, IDH-mutant	Diffuse Astrocytoma, IDH-mutant	II	II	24.7833	M	non-Asian	0	NA	NA	13	No	No	IDHmut	noncodel	NO	NO	NO	YES	YES	YES	NO	NO	Bai et al 16	NA
PS229	Yale	Oligodendroglioma, IDH-mutant and 1p/19q-codeleted	Anaplastic Oligodendroglioma, IDH-mutant and 1p/19q-codeleted	II	IV	61.1333	F	non-Asian	1	NA	NA	52	No	Yes	IDHmut	codel	NO	NO	NO	YES	YES	YES	NO	NO	Bai et al 16	NA
PS230	Yale	Diffuse Astrocytoma, IDH-mutant	Glioblastoma, IDH-mutant	II	IV	49.8	M	non-Asian	0	NA	NA	24	No	No	IDHmut	noncodel	NO	NO	NO	YES	YES	YES	NO	NO	Bai et al 16	NA
PS231	Yale	Diffuse Astrocytoma, IDH-mutant	Diffuse Astrocytoma, IDH-mutant	II	II	24.7167	M	non-Asian	0	NA	NA	29	No	No	IDHmut	noncodel	NO	NO	NO	NO	YES	YES	NO	NO	Bai et al 16	NA
PS232	Yale	Diffuse Astrocytoma, IDH-mutant	Glioblastoma, IDH-mutant	II	IV	37.0667	M	non-Asian	0	NA	NA	50	No	No	IDHmut	noncodel	NO	NO	NO	NO	YES	YES	NO	NO	Bai et al 16	NA
PS233	Yale	Oligodendroglioma, IDH-mutant and 1p/19q-codeleted	Anaplastic Oligodendroglioma, IDH-mutant and 1p/19q-codeleted	II	III	41.5167	F	non-Asian	0	NA	NA	113	No	No	IDHmut	codel	NO	NO	NO	NO	YES	YES	NO	NO	Bai et al 16	NA
PS234	Yale	Diffuse Astrocytoma, IDH-mutant	Glioblastoma, IDH-mutant	II	IV	59.9667	M	non-Asian	1	NA	NA	14	No	No	IDHmut	noncodel	NO	NO	NO	NO	YES	YES	NO	NO	Bai et al 16	NA
PS235	Yale	Diffuse Astrocytoma, IDH-mutant	Glioblastoma, IDH-mutant	II	IV	44.0333	F	non-Asian	1	NA	NA	58	No	No	IDHmut	noncodel	NO	NO	NO	NO	YES	YES	NO	NO	Bai et al 16	NA
PS236	Yale	Diffuse Astrocytoma, IDH-mutant	Glioblastoma, IDH-mutant	II	IV	31.1	M	non-Asian	0	NA	NA	66	No	No	IDHmut	noncodel	NO	NO	NO	NO	YES	YES	NO	NO	Bai et al 16	NA
PS237	Yale	Diffuse Astrocytoma, IDH-mutant	Diffuse Astrocytoma, IDH-mutant	II	II	57.8167	M	non-Asian	0	NA	NA	53	No	No	IDHmut	noncodel	NO	NO	NO	NO	YES	YES	NO	NO	Bai et al 16	NA
PS238	Yale	Diffuse Astrocytoma, IDH-mutant	Anaplastic Astrocytoma, IDH-mutant	II	III	29.1833	F	non-Asian	0	NA	NA	43	No	No	IDHmut	noncodel	NO	NO	NO	NO	YES	YES	NO	NO	Bai et al 16	NA
PS239	Yale	Oligodendroglioma, IDH-mutant and 1p/19q-codeleted	Anaplastic Oligodendroglioma, IDH-mutant and 1p/19q-codeleted	II	III	57.55	F	non-Asian	0	NA	NA	99	No	No	IDHmut	codel	NO	NO	NO	NO	YES	YES	NO	NO	Bai et al 16	NA
PS240	Yale	Diffuse Astrocytoma, IDH-mutant	Glioblastoma, IDH-mutant	II	IV	25.7	M	non-Asian	0	NA	NA	18	No	No	IDHmut	noncodel	NO	NO	NO	NO	YES	YES	NO	NO	Bai et al 16	NA
PS241	Yale	Oligodendroglioma, IDH-mutant and 1p/19q-codeleted	Anaplastic Oligodendroglioma, IDH-mutant and 1p/19q-codeleted	II	III	58.0833	M	non-Asian	0	NA	NA	121	No	No	IDHmut	codel	NO	NO	NO	NO	YES	YES	NO	NO	Bai et al 16	NA
PS242	Yale	Oligodendroglioma, IDH-mutant and 1p/19q-codeleted	Anaplastic Oligodendroglioma, IDH-mutant and 1p/19q-codeleted	II	III	55.55	M	non-Asian	0	NA	NA	69	No	No	IDHmut	codel	NO	NO	NO	NO	YES	YES	NO	NO	Bai et al 16	NA
PS243	Yale	Oligodendroglioma, IDH-mutant and 1p/19q-codeleted	Anaplastic Oligodendroglioma, IDH-mutant and 1p/19q-codeleted	II	III	53.0667	F	non-Asian	0	NA	NA	26	No	No	IDHmut	codel	NO	NO	NO	NO	YES	YES	NO	NO	Bai et al 16	NA
PS244	Yale	Diffuse Astrocytoma, IDH-mutant	Anaplastic Astrocytoma, IDH-mutant	II	III	36.1	M	non-Asian	NA	NA	NA	24	No	No	IDHmut	noncodel	NO	NO	NO	NO	YES	YES	NO	NO	Bai et al 16	NA
PS245	Yale	Oligodendroglioma, IDH-mutant and 1p/19q-codeleted	Anaplastic Oligodendroglioma, IDH-mutant and 1p/19q-codeleted	II	III	62.8	F	non-Asian	0	NA	NA	72	No	No	IDHmut	codel	NO	NO	NO	NO	YES	YES	NO	NO	Bai et al 16	NA
PS246	Yale	Diffuse Astrocytoma, IDH-mutant	Anaplastic Astrocytoma, IDH-mutant	II	III	46.6333	F	non-Asian	0	NA	NA	28	No	No	IDHmut	noncodel	NO	NO	NO	NO	YES	YES	NO	NO	Bai et al 16	NA
PS247	Yale	Diffuse Astrocytoma, IDH-mutant	Glioblastoma, IDH-mutant	II	IV	33.4833	F	non-Asian	0	NA	NA	7	No	No	IDHmut	noncodel	NO	NO	NO	NO	YES	YES	NO	NO	Bai et al 16	NA
PS248	Yale	Diffuse Astrocytoma, IDH-mutant	Anaplastic Astrocytoma, IDH-mutant	II	III	52.4167	F	non-Asian	NA	NA	NA	53	No	No	IDHmut	noncodel	NO	NO	NO	NO	YES	YES	NO	NO	Bai et al 16	NA
PS249	Yale	Diffuse Astrocytoma, IDH-mutant	Anaplastic Astrocytoma, IDH-mutant	II	III	40.3833	M	non-Asian	0	NA	NA	31	No	No	IDHmut	noncodel	NO	NO	NO	NO	YES	YES	NO	NO	Bai et al 16	NA
PS250	Yale	Oligodendroglioma, IDH-mutant and 1p/19q-codeleted	Anaplastic Oligodendroglioma, IDH-mutant and 1p/19q-codeleted	II	III	43.05	F	non-Asian	1	NA	NA	15	No	Yes	IDHmut	codel	NO	NO	NO	NO	YES	YES	NO	NO	Bai et al 16	NA
PS251	Yale	Diffuse Astrocytoma, IDH-mutant	Anaplastic Astrocytoma, IDH-mutant	II	III	32.65	M	non-Asian	0	NA	NA	21	No	No	IDHmut	noncodel	NO	NO	NO	NO	YES	YES	NO	NO	Bai et al 16	NA
PS252	TCGA-LGG	Anaplastic Oligodendroglioma, IDH-mutant and 1p/19q-codeleted	Anaplastic Oligodendroglioma, IDH-mutant and 1p/19q-codeleted	III	III	70	M	non-Asian	NA	30.19	1	8.54	No	No	IDHmut	codel	YES	YES	YES	YES	YES	YES	YES	YES	SAVI	CNVkit
PS253	TCGA-LGG	Oligodendroglioma, IDH-mutant and 1p/19q-codeleted	Anaplastic Oligodendroglioma, IDH-mutant and 1p/19q-codeleted	II	III	34	F	non-Asian	0	182.19	0	142.81	No	No	IDHmut	codel	YES	YES	YES	YES	YES	YES	YES	YES	SAVI	CNVkit
PS254	TCGA-LGG	Diffuse Astrocytoma, IDH-mutant	Diffuse Astrocytoma, IDH-mutant	II	II	43	F	non-Asian	1	17.48	0	8.71	No	No	IDHmut	noncodel	YES	YES	YES	YES	YES	YES	NO	YES	SAVI	CNVkit
PS255	TCGA-LGG	Anaplastic Oligodendroglioma, IDH-mutant and 1p/19q-codeleted	Anaplastic Oligodendroglioma, IDH-mutant and 1p/19q-codeleted	III	IV	45	M	non-Asian	0	46.02	1	27.5	No	No	IDHmut	codel	YES	YES	YES	YES	YES	YES	YES	YES	SAVI	CNVkit
PS256	TCGA-LGG	Anaplastic Astrocytoma, IDH-wildtype	Diffuse Astrocytoma, IDH-wildtype	III	II	24	F	non-Asian	1	133.64	1	37.91	No	No	IDHwt	noncodel	YES	YES	YES	YES	YES	YES	YES	YES	SAVI	CNVkit
PS257	TCGA-LGG	Diffuse Astrocytoma, IDH-mutant	Glioblastoma, IDH-mutant	II	IV	35	F	non-Asian	1	94.45	1	78.75	No	Yes	IDHmut	noncodel	YES	YES	YES	YES	YES	YES	YES	YES	SAVI	CNVkit
PS258	TCGA-LGG	Anaplastic Astrocytoma, IDH-mutant	Anaplastic Astrocytoma, IDH-mutant	III	III	43	M	non-Asian	1	23.29	1	10.15	No	No	IDHmut	noncodel	YES	YES	YES	YES	YES	YES	YES	YES	SAVI	CNVkit
PS259	TCGA-LGG	Anaplastic Astrocytoma, IDH-wildtype	Glioblastoma, IDH-wildtype	III	IV	23	M	non-Asian	1	25.46	1	16.33	No	No	IDHwt	noncodel	NO	NO	NO	YES	YES	YES	YES	YES	SAVI	CNVkit
PS260	TCGA-LGG	Diffuse Astrocytoma, IDH-mutant	Glioblastoma, IDH-mutant	II	IV	39	F	non-Asian	1	36.79	1	34	No	No	IDHmut	noncodel	YES	YES	YES	YES	YES	YES	YES	YES	SAVI	CNVkit
PS261	TCGA-LGG	Diffuse Astrocytoma, IDH-mutant	Anaplastic Astrocytoma, IDH-mutant	II	III	27	F	non-Asian	NA	38.24	0	16.39	No	No	IDHmut	noncodel	YES	YES	YES	YES	YES	YES	YES	YES	SAVI	CNVkit
PS262	TCGA-LGG	Diffuse Astrocytoma, IDH-mutant	Anaplastic Astrocytoma, IDH-mutant	II	III	41	F	non-Asian	NA	65.34	0	30.35	No	No	IDHmut	noncodel	YES	YES	YES	YES	YES	YES	YES	YES	SAVI	CNVkit
PS263	TCGA-LGG	Diffuse Astrocytoma, IDH-mutant	Diffuse Astrocytoma, IDH-mutant	II	II	29	M	non-Asian	NA	44.05	0	28.19	No	No	IDHmut	noncodel	YES	YES	YES	YES	YES	YES	YES	YES	SAVI	CNVkit
PS264	TCGA-LGG	Diffuse Astrocytoma, IDH-mutant	Diffuse Astrocytoma, IDH-mutant	II	II	27	M	non-Asian	NA	61.37	0	17.41	No	No	IDHmut	noncodel	YES	YES	YES	YES	YES	YES	YES	YES	SAVI	CNVkit
PS265	TCGA-LGG	Diffuse Astrocytoma, IDH-mutant	Anaplastic Astrocytoma, IDH-mutant	II	III	42	F	non-Asian	NA	31.34	1	14.95	No	No	IDHmut	noncodel	YES	YES	YES	YES	YES	YES	YES	YES	SAVI	CNVkit
PS266	SMC	Anaplastic Oligodendroglioma, IDH-mutant and 1p/19q-codeleted	Anaplastic Oligodendroglioma, IDH-mutant and 1p/19q-codeleted	III	III	56	F	Asian	1	58.6667	1	NA	No	No	IDHmut	codel	NO	NO	NO	YES	YES	YES	NO	YES	SAVI	CNVkit
PS267	SMC	Glioblastoma, IDH-wildtype	Glioblastoma, IDH-wildtype	IV	IV	59	F	Asian	1	33.0667	1	NA	No	Yes	IDHwt	noncodel	NO	NO	NO	YES	YES	YES	YES	YES	SAVI	CNVkit
PS268	SMC	Glioblastoma, IDH-wildtype	Glioblastoma, IDH-wildtype	IV	IV	43	M	Asian	1	16.1333	1	NA	No	No	IDHwt	noncodel	NO	NO	NO	YES	YES	YES	YES	YES	SAVI	CNVkit
PS269	SMC	Glioblastoma, IDH-wildtype	Glioblastoma, IDH-wildtype	IV	IV	67	M	Asian	1	68.4	0	NA	No	No	IDHwt	noncodel	NO	NO	NO	YES	YES	YES	YES	YES	SAVI	CNVkit
PS270	SMC	Glioblastoma, IDH-wildtype	Glioblastoma, IDH-wildtype	IV	IV	43	M	Asian	1	18.0333	1	NA	No	No	IDHwt	noncodel	NO	NO	NO	YES	YES	YES	YES	YES	SAVI	CNVkit
PS271	SMC	Anaplastic Oligodendroglioma, IDH-mutant and 1p/19q-codeleted	Anaplastic Oligodendroglioma, IDH-mutant and 1p/19q-codeleted	III	III	53	F	Asian	1	218.667	1	NA	No	Yes	IDHmut	codel	NO	NO	NO	YES	YES	YES	YES	YES	SAVI	CNVkit
PS272	SMC	Glioblastoma, IDH-wildtype	Glioblastoma, IDH-wildtype	IV	IV	60	M	Asian	1	10.6	0	NA	No	No	IDHwt	noncodel	NO	NO	NO	YES	YES	YES	YES	YES	SAVI	CNVkit
PS273	SMC	Glioblastoma, IDH-wildtype	Glioblastoma, IDH-wildtype	IV	IV	64	M	Asian	1	10.4	1	NA	No	No	IDHwt	noncodel	NO	NO	NO	NO	YES	YES	YES	NO	NA	NA
PS274	SMC	Glioblastoma, IDH-wildtype	Glioblastoma, IDH-wildtype	IV	IV	49	M	Asian	1	28.1667	1	NA	No	No	IDHwt	noncodel	NO	NO	NO	YES	YES	YES	YES	NO	SAVI	CNVkit
PS275	SMC	Glioblastoma, IDH-wildtype	Glioblastoma, IDH-wildtype	IV	IV	49	M	Asian	1	14.7333	0	NA	No	No	IDHwt	noncodel	NO	NO	NO	YES	YES	NO	YES	YES	NA	NA
PS276	SMC	Glioblastoma, IDH-wildtype	Glioblastoma, IDH-wildtype	IV	IV	41	F	Asian	1	12.6667	1	NA	No	No	IDHwt	noncodel	NO	NO	NO	YES	YES	YES	YES	YES	SAVI	CNVkit
PS277	SMC	Glioblastoma, IDH-wildtype	Glioblastoma, IDH-wildtype	IV	IV	61	F	Asian	1	14.4333	0	NA	No	No	IDHwt	noncodel	NO	NO	NO	YES	YES	YES	NO	YES	SAVI	NA
PS278	NWU	Glioblastoma, IDH-wildtype	Glioblastoma, IDH-wildtype	IV	IV	41	M	NA	1	25.4	0	5.3	No	No	IDHwt	noncodel	NO	NO	NO	YES	YES	YES	YES	YES	SAVI	CNVkit
PS279	NWU	Anaplastic Oligodendroglioma, IDH-mutant and 1p/19q-codeleted	Anaplastic Oligodendroglioma, IDH-mutant and 1p/19q-codeleted	IV	IV	55	F	NA	1	55.6	1	15.47	No	No	IDHmut	codel	NO	NO	NO	YES	YES	YES	YES	YES	SAVI	CNVkit
PS280	NWU	Glioblastoma, IDH-wildtype	Glioblastoma, IDH-wildtype	IV	IV	63	M	NA	1	34	1	18.47	No	No	IDHwt	noncodel	NO	NO	NO	YES	YES	YES	YES	YES	SAVI	CNVkit
PS281	NWU	Glioblastoma, IDH-wildtype	Glioblastoma, IDH-wildtype	IV	IV	59	M	NA	1	10.3	1	1.43	No	No	IDHwt	noncodel	NO	NO	NO	YES	YES	YES	YES	YES	SAVI	CNVkit
PS282	NWU	Anaplastic Oligodendroglioma, IDH-mutant and 1p/19q-codeleted	Anaplastic Oligodendroglioma, IDH-mutant and 1p/19q-codeleted	IV	IV	33	F	NA	1	36.6	0	23.57	No	No	IDHmut	codel	NO	NO	NO	YES	YES	YES	YES	YES	SAVI	CNVkit
PS284	NWU	Glioblastoma, IDH-wildtype	Glioblastoma, IDH-wildtype	IV	IV	64	F	NA	1	45.4	0	7.03	No	No	IDHwt	noncodel	NO	NO	NO	YES	YES	YES	YES	YES	SAVI	CNVkit
PS285	NWU	Glioblastoma, IDH-wildtype	Glioblastoma, IDH-wildtype	IV	IV	70	M	NA	1	31.3	1	23.53	No	No	IDHwt	noncodel	NO	NO	NO	YES	YES	YES	YES	YES	SAVI	CNVkit
PS286	NWU	Glioblastoma, IDH-wildtype	Glioblastoma, IDH-wildtype	IV	IV	67	M	NA	1	23.1	0	3.73	No	No	IDHwt	noncodel	NO	NO	NO	YES	YES	YES	YES	YES	SAVI	CNVkit
PS287	NWU	Glioblastoma, IDH-wildtype	Glioblastoma, IDH-wildtype	IV	IV	54	F	NA	1	19.6	1	9.8	No	No	IDHwt	noncodel	NO	NO	NO	YES	YES	YES	YES	YES	SAVI	CNVkit
PS288	NWU	Glioblastoma, IDH-wildtype	Glioblastoma, IDH-wildtype	IV	IV	66	F	NA	1	15.3	1	7.77	No	No	IDHwt	noncodel	NO	NO	NO	YES	YES	YES	YES	YES	SAVI	CNVkit
PS289	NWU	Glioblastoma, IDH-wildtype	Glioblastoma, IDH-wildtype	IV	IV	70	M	NA	1	15.9	1	5.83	No	No	IDHwt	noncodel	NO	NO	NO	YES	YES	YES	NO	YES	SAVI	CNVkit
PS291	NWU	Anaplastic Oligodendroglioma, IDH-mutant and 1p/19q-codeleted	Anaplastic Oligodendroglioma, IDH-mutant and 1p/19q-codeleted	IV	IV	32	M	NA	1	45.6	1	43.2	No	No	IDHmut	codel	NO	NO	NO	YES	YES	YES	YES	YES	SAVI	CNVkit
PS293	NWU	Glioblastoma, IDH-wildtype	Glioblastoma, IDH-wildtype	IV	IV	64	M	NA	1	14.4	0	9.93	No	No	IDHwt	noncodel	NO	NO	NO	NO	YES	YES	YES	YES	NA	NA
PS294	NWU	Glioblastoma, IDH-wildtype	Glioblastoma, IDH-wildtype	IV	IV	42	F	NA	1	46.5	0	35.27	No	No	IDHwt	noncodel	NO	NO	NO	YES	YES	YES	YES	YES	NA	NA
PS295	MSKCC	Glioblastoma, IDH-wildtype	Glioblastoma, IDH-wildtype	IV	IV	45.0833	M	NA	1	83.7	1	61	No	No	IDHwt	noncodel	NO	NO	NO	panel	panel	panel	NO	NO	Jonsson et al 19	Jonsson et al 19
PS296	MSKCC	Glioblastoma, IDH-wildtype	Glioblastoma, IDH-wildtype	IV	IV	63.4417	F	NA	1	39.4	0	29.3	No	No	IDHwt	noncodel	NO	NO	NO	panel	panel	panel	NO	NO	Jonsson et al 19	Jonsson et al 19
PS297	MSKCC	Glioblastoma, IDH-wildtype	Glioblastoma, IDH-wildtype	IV	IV	44.1917	F	NA	0	32.1	1	14.3	No	No	IDHwt	noncodel	NO	NO	NO	panel	panel	panel	NO	NO	Jonsson et al 19	Jonsson et al 19
PS298	MSKCC	Glioblastoma, IDH-wildtype	Glioblastoma, IDH-wildtype	IV	IV	55.55	M	NA	1	25.3	1	18.6	No	No	IDHwt	noncodel	NO	NO	NO	panel	panel	panel	NO	NO	Jonsson et al 19	Jonsson et al 19
PS299	MSKCC	Glioblastoma, IDH-wildtype	Glioblastoma, IDH-wildtype	IV	IV	64.6275	F	NA	1	21.1	1	7.53	No	No	IDHwt	noncodel	NO	NO	NO	panel	panel	panel	NO	NO	Jonsson et al 19	Jonsson et al 19
PS300	MSKCC	Glioblastoma, IDH-wildtype	Glioblastoma, IDH-wildtype	IV	IV	64.6517	M	NA	1	22.7	1	7.82	No	No	IDHwt	noncodel	NO	NO	NO	panel	panel	panel	NO	NO	Jonsson et al 19	Jonsson et al 19
PS301	MSKCC	Glioblastoma, IDH-wildtype	Glioblastoma, IDH-wildtype	IV	IV	47.455	M	NA	1	10.8	0	5.46	No	No	IDHwt	noncodel	NO	NO	NO	panel	panel	panel	NO	NO	Jonsson et al 19	Jonsson et al 19
PS302	MSKCC	Glioblastoma, IDH-wildtype	Glioblastoma, IDH-wildtype	IV	IV	74.4275	M	NA	1	11	1	5.13	No	No	IDHwt	noncodel	NO	NO	NO	panel	panel	panel	NO	NO	Jonsson et al 19	Jonsson et al 19
PS303	MSKCC	Glioblastoma, IDH-wildtype	Glioblastoma, IDH-wildtype	IV	IV	68.6192	M	NA	1	13.5	1	7.43	No	No	IDHwt	noncodel	NO	NO	NO	panel	panel	panel	NO	NO	Jonsson et al 19	Jonsson et al 19
PS304	MSKCC	Glioblastoma, IDH-wildtype	Glioblastoma, IDH-wildtype	IV	IV	65.655	F	NA	1	20.8	1	7.86	No	No	IDHwt	noncodel	NO	NO	NO	panel	panel	panel	NO	NO	Jonsson et al 19	Jonsson et al 19
PS305	MSKCC	Glioblastoma, IDH-wildtype	Glioblastoma, IDH-wildtype	IV	IV	69.5892	M	NA	1	7.53	0	7.07	No	No	IDHwt	noncodel	NO	NO	NO	panel	panel	panel	NO	NO	Jonsson et al 19	Jonsson et al 19
PS306	MSKCC	Glioblastoma, IDH-wildtype	Glioblastoma, IDH-wildtype	IV	IV	54.7675	M	NA	1	12.4	0	9.21	No	No	IDHwt	noncodel	NO	NO	NO	panel	panel	panel	NO	NO	Jonsson et al 19	Jonsson et al 19
PS307	MSKCC	Glioblastoma, IDH-wildtype	Glioblastoma, IDH-wildtype	IV	IV	77.5042	M	NA	1	24.8	1	6.05	No	No	IDHwt	noncodel	NO	NO	NO	panel	panel	panel	NO	NO	Jonsson et al 19	Jonsson et al 19
PS308	MSKCC	Glioblastoma, IDH-wildtype	Glioblastoma, IDH-wildtype	IV	IV	52.475	M	NA	1	45.4	1	29.7	No	No	IDHwt	noncodel	NO	NO	NO	panel	panel	panel	NO	NO	Jonsson et al 19	Jonsson et al 19
PS309	MSKCC	Glioblastoma, IDH-wildtype	Glioblastoma, IDH-wildtype	IV	IV	29.0417	M	NA	1	22.8	1	12.5	No	No	IDHwt	noncodel	NO	NO	NO	panel	panel	panel	NO	NO	Jonsson et al 19	Jonsson et al 19
PS310	MSKCC	Glioblastoma, IDH-wildtype	Glioblastoma, IDH-wildtype	IV	IV	48.4108	M	NA	1	13.4	1	4.93	No	No	IDHwt	noncodel	NO	NO	NO	panel	panel	panel	NO	NO	Jonsson et al 19	Jonsson et al 19
PS311	MSKCC	Glioblastoma, IDH-wildtype	Glioblastoma, IDH-wildtype	IV	IV	42.3783	F	NA	1	8.05	1	4.54	No	No	IDHwt	noncodel	NO	NO	NO	panel	panel	panel	NO	NO	Jonsson et al 19	Jonsson et al 19
PS312	MSKCC	Glioblastoma, IDH-wildtype	Glioblastoma, IDH-wildtype	IV	IV	38.5525	M	NA	1	28.3	1	6.63	No	No	IDHwt	noncodel	NO	NO	NO	panel	panel	panel	NO	NO	Jonsson et al 19	Jonsson et al 19
PS313	MSKCC	Glioblastoma, IDH-wildtype	Glioblastoma, IDH-wildtype	IV	IV	47.6333	M	NA	1	13.1	1	7.6	No	No	IDHwt	noncodel	NO	NO	NO	panel	panel	panel	NO	NO	Jonsson et al 19	Jonsson et al 19
PS314	MSKCC	Glioblastoma, IDH-wildtype	Glioblastoma, IDH-wildtype	IV	IV	63.3333	M	NA	1	51.3	0	40	No	No	IDHwt	noncodel	NO	NO	NO	panel	panel	panel	NO	NO	Jonsson et al 19	Jonsson et al 19
PS315	MSKCC	Glioblastoma, IDH-wildtype	Glioblastoma, IDH-wildtype	IV	IV	49.4583	M	NA	1	61.2	0	53.5	No	No	IDHwt	noncodel	NO	NO	NO	panel	panel	panel	NO	NO	Jonsson et al 19	Jonsson et al 19
PS316	MSKCC	Glioblastoma, IDH-wildtype	Glioblastoma, IDH-wildtype	IV	IV	54.575	F	NA	1	25.4	0	6.9	No	No	IDHwt	noncodel	NO	NO	NO	panel	panel	panel	NO	NO	Jonsson et al 19	Jonsson et al 19
PS317	MSKCC	Glioblastoma, IDH-wildtype	Glioblastoma, IDH-wildtype	IV	IV	68.55	M	NA	1	30.4	0	18.6	No	Yes	IDHwt	noncodel	NO	NO	NO	panel	panel	panel	NO	NO	Jonsson et al 19	Jonsson et al 19
PS318	MSKCC	Glioblastoma, IDH-wildtype	Glioblastoma, IDH-wildtype	IV	IV	49.6708	M	NA	1	16.7	1	8.05	No	No	IDHwt	noncodel	NO	NO	NO	panel	panel	panel	NO	NO	Jonsson et al 19	Jonsson et al 19
PS319	MSKCC	Glioblastoma, IDH-wildtype	Glioblastoma, IDH-wildtype	IV	IV	57.6	M	NA	1	28.1	1	19.2	No	Yes	IDHwt	noncodel	NO	NO	NO	panel	panel	panel	NO	NO	Jonsson et al 19	Jonsson et al 19
PS320	MSKCC	Glioblastoma, IDH-wildtype	Glioblastoma, IDH-wildtype	IV	IV	51.7583	F	NA	1	42.5	0	33.1	No	No	IDHwt	noncodel	NO	NO	NO	panel	panel	panel	NO	NO	Jonsson et al 19	Jonsson et al 19
PS321	MSKCC	Glioblastoma, IDH-wildtype	Glioblastoma, IDH-wildtype	IV	IV	28.6833	M	NA	1	34	0	20.2	No	No	IDHwt	noncodel	NO	NO	NO	panel	panel	panel	NO	NO	Jonsson et al 19	Jonsson et al 19
PS322	MSKCC	Glioblastoma, IDH-wildtype	Glioblastoma, IDH-wildtype	IV	IV	45.3558	M	NA	1	23.5	1	4.27	No	No	IDHwt	noncodel	NO	NO	NO	panel	panel	panel	NO	NO	Jonsson et al 19	Jonsson et al 19
PS323	MSKCC	Glioblastoma, IDH-wildtype	Glioblastoma, IDH-wildtype	IV	IV	61.6517	M	NA	1	16.4	1	7.82	No	No	IDHwt	noncodel	NO	NO	NO	panel	panel	panel	NO	NO	Jonsson et al 19	Jonsson et al 19
PS324	MSKCC	Glioblastoma, IDH-wildtype	Glioblastoma, IDH-wildtype	IV	IV	49.0833	M	NA	1	58.6	0	49	No	No	IDHwt	noncodel	NO	NO	NO	panel	panel	panel	NO	NO	Jonsson et al 19	Jonsson et al 19
PS325	MSKCC	Glioblastoma, IDH-wildtype	Glioblastoma, IDH-wildtype	IV	IV	35.5917	M	NA	1	37.3	0	31.1	No	No	IDHwt	noncodel	NO	NO	NO	panel	panel	panel	NO	NO	Jonsson et al 19	Jonsson et al 19
PS326	MSKCC	Glioblastoma, IDH-wildtype	Glioblastoma, IDH-wildtype	IV	IV	49.715	M	NA	1	17.1	1	8.58	No	No	IDHwt	noncodel	NO	NO	NO	panel	panel	panel	NO	NO	Jonsson et al 19	Jonsson et al 19
PS327	MSKCC	Glioblastoma, IDH-wildtype	Glioblastoma, IDH-wildtype	IV	IV	65.0183	F	NA	1	27.4	1	24.22	No	No	IDHwt	noncodel	NO	NO	NO	panel	panel	panel	NO	NO	Jonsson et al 19	Jonsson et al 19
PS328	MSKCC	Glioblastoma, IDH-wildtype	Glioblastoma, IDH-wildtype	IV	IV	42.7867	M	NA	1	16.3	1	9.44	No	No	IDHwt	noncodel	NO	NO	NO	panel	panel	panel	NO	NO	Jonsson et al 19	Jonsson et al 19
PS329	MSKCC	Glioblastoma, IDH-wildtype	Glioblastoma, IDH-wildtype	IV	IV	56.125	M	NA	1	76.2	1	13.5	No	Yes	IDHwt	noncodel	NO	NO	NO	panel	panel	panel	NO	NO	Jonsson et al 19	Jonsson et al 19
PS330	MSKCC	Glioblastoma, IDH-wildtype	Glioblastoma, IDH-wildtype	IV	IV	41.3383	F	NA	1	21.7	1	16.06	No	No	IDHwt	noncodel	NO	NO	NO	panel	panel	panel	NO	NO	Jonsson et al 19	Jonsson et al 19
PS331	MSKCC	Anaplastic Astrocytoma, IDH-wildtype	NA	III	IV	75.375	F	NA	1	58.5	1	40.5	No	No	IDHwt	noncodel	NO	NO	NO	panel	panel	panel	NO	NO	Jonsson et al 19	Jonsson et al 19
PS332	MSKCC	Glioblastoma, IDH-wildtype	Glioblastoma, IDH-wildtype	IV	IV	46.6333	F	NA	1	43.5	1	7.6	No	No	IDHwt	noncodel	NO	NO	NO	panel	panel	panel	NO	NO	Jonsson et al 19	Jonsson et al 19
PS333	MSKCC	Anaplastic Astrocytoma, IDH-wildtype	Glioblastoma, IDH-wildtype	III	IV	49.475	M	NA	1	27.8	1	17.7	No	Yes	IDHwt	noncodel	NO	NO	NO	panel	panel	panel	NO	NO	Jonsson et al 19	Jonsson et al 19
PS334	MSKCC	Anaplastic Astrocytoma, IDH-wildtype	Anaplastic Astrocytoma, IDH-wildtype	III	III	57.3	M	NA	1	21.9	1	15.6	No	No	IDHwt	noncodel	NO	NO	NO	panel	panel	panel	NO	NO	Jonsson et al 19	Jonsson et al 19
PS335	MSKCC	Glioblastoma, IDH-wildtype	Glioblastoma, IDH-wildtype	IV	IV	52.7417	M	NA	1	64.1	1	20.9	No	No	IDHwt	noncodel	NO	NO	NO	panel	panel	panel	NO	NO	Jonsson et al 19	Jonsson et al 19
PS336	MSKCC	Diffuse Astrocytoma, IDH-wildtype	Anaplastic Astrocytoma, IDH-wildtype	II	III	22.4667	F	NA	1	24.2	1	17.6	No	No	IDHwt	noncodel	NO	NO	NO	panel	panel	panel	NO	NO	Jonsson et al 19	Jonsson et al 19
PS337	MSKCC	Glioblastoma, IDH-mutant	Glioblastoma, IDH-mutant	IV	IV	29.5067	M	NA	1	25.1	0	6.08	No	No	IDHmut	noncodel	NO	NO	NO	panel	panel	panel	NO	NO	Jonsson et al 19	Jonsson et al 19
PS338	MSKCC	Glioblastoma, IDH-mutant	Glioblastoma, IDH-mutant	IV	IV	24.085	M	NA	0	13.2	0	1.02	No	No	IDHmut	noncodel	NO	NO	NO	panel	panel	panel	NO	NO	Jonsson et al 19	Jonsson et al 19
PS339	MSKCC	Anaplastic Astrocytoma, IDH-mutant	Glioblastoma, IDH-mutant	III	IV	44.1083	M	NA	1	90.8	1	85.3	No	No	IDHmut	noncodel	NO	NO	NO	panel	panel	panel	NO	NO	Jonsson et al 19	Jonsson et al 19
PS340	MSKCC	Anaplastic Astrocytoma, IDH-mutant	Anaplastic Astrocytoma, IDH-mutant	III	III	32.2167	F	NA	1	77.2	1	50.6	No	No	IDHmut	noncodel	NO	NO	NO	panel	panel	panel	NO	NO	Jonsson et al 19	Jonsson et al 19
PS341	MSKCC	Anaplastic Astrocytoma, IDH-mutant	Anaplastic Astrocytoma, IDH-mutant	III	III	47.1333	F	NA	1	84.2	1	73.6	No	Yes	IDHmut	noncodel	NO	NO	NO	panel	panel	panel	NO	NO	Jonsson et al 19	Jonsson et al 19
PS342	MSKCC	Anaplastic Astrocytoma, IDH-mutant	Anaplastic Astrocytoma, IDH-mutant	III	III	45.5942	F	NA	1	27.5	0	7.13	No	No	IDHmut	noncodel	NO	NO	NO	panel	panel	panel	NO	NO	Jonsson et al 19	Jonsson et al 19
PS343	MSKCC	Anaplastic Astrocytoma, IDH-mutant	Anaplastic Astrocytoma, IDH-mutant	III	III	34.3667	F	NA	1	65	0	64.4	No	No	IDHmut	noncodel	NO	NO	NO	panel	panel	panel	NO	NO	Jonsson et al 19	Jonsson et al 19
PS344	MSKCC	Anaplastic Astrocytoma, IDH-mutant	Anaplastic Astrocytoma, IDH-mutant	III	III	25.25	M	NA	1	34.6	0	27	No	No	IDHmut	noncodel	NO	NO	NO	panel	panel	panel	NO	NO	Jonsson et al 19	Jonsson et al 19
PS345	MSKCC	Anaplastic Astrocytoma, IDH-mutant	Anaplastic Astrocytoma, IDH-mutant	III	III	40.7917	M	NA	1	49	1	33.5	No	Yes	IDHmut	noncodel	NO	NO	NO	panel	panel	panel	NO	NO	Jonsson et al 19	Jonsson et al 19
PS346	MSKCC	Diffuse Astrocytoma, IDH-mutant	Diffuse Astrocytoma, IDH-mutant	II	II	30.4667	F	NA	1	99.1	1	41.6	No	No	IDHmut	noncodel	NO	NO	NO	panel	panel	panel	NO	NO	Jonsson et al 19	Jonsson et al 19
PS347	MSKCC	Anaplastic Astrocytoma, IDH-mutant	Glioblastoma, IDH-mutant	III	IV	34.6917	F	NA	1	78.5	1	8.3	No	Yes	IDHmut	noncodel	NO	NO	NO	panel	panel	panel	NO	NO	Jonsson et al 19	Jonsson et al 19
PS348	MSKCC	Diffuse Astrocytoma, IDH-mutant	Anaplastic Astrocytoma, IDH-mutant	II	III	27.2667	M	NA	1	120	1	27.2	No	Yes	IDHmut	noncodel	NO	NO	NO	panel	panel	panel	NO	NO	Jonsson et al 19	Jonsson et al 19
PS349	MSKCC	Anaplastic Astrocytoma, IDH-mutant	Anaplastic Astrocytoma, IDH-mutant	III	III	27.7417	M	NA	1	85.6	0	44.9	No	No	IDHmut	noncodel	NO	NO	NO	panel	panel	panel	NO	NO	Jonsson et al 19	Jonsson et al 19
PS350	MSKCC	Anaplastic Oligodendroglioma, IDH-mutant and 1p/19q-codeleted	Anaplastic Oligodendroglioma, IDH-mutant and 1p/19q-codeleted	III	III	34.525	M	NA	1	80.8	0	42.3	No	No	IDHmut	codel	NO	NO	NO	panel	panel	panel	NO	NO	Jonsson et al 19	Jonsson et al 19
PS351	MSKCC	Anaplastic Oligodendroglioma, IDH-mutant and 1p/19q-codeleted	Anaplastic Oligodendroglioma, IDH-mutant and 1p/19q-codeleted	III	III	35.0833	M	NA	1	129	0	25	No	No	IDHmut	codel	NO	NO	NO	panel	panel	panel	NO	NO	Jonsson et al 19	Jonsson et al 19
PS352	MSKCC	Anaplastic Oligodendroglioma, IDH-mutant and 1p/19q-codeleted	Anaplastic Oligodendroglioma, IDH-mutant and 1p/19q-codeleted	III	III	42.75	M	NA	1	192	0	21	Yes	Yes	IDHmut	codel	NO	NO	NO	panel	panel	panel	NO	NO	Jonsson et al 19	Jonsson et al 19
PS353	MSKCC	Oligodendroglioma, IDH-mutant and 1p/19q-codeleted	Oligodendroglioma, IDH-mutant and 1p/19q-codeleted	II	II	47.5	F	NA	1	135	1	126	No	No	IDHmut	codel	NO	NO	NO	panel	panel	panel	NO	NO	Jonsson et al 19	Jonsson et al 19
PS354	MSKCC	Oligodendroglioma, IDH-mutant and 1p/19q-codeleted	Anaplastic Oligodendroglioma, IDH-mutant and 1p/19q-codeleted	II	III	48.4417	F	NA	1	130	0	101.3	No	Yes	IDHmut	codel	NO	NO	NO	panel	panel	panel	NO	NO	Jonsson et al 19	Jonsson et al 19
PS355	MSKCC	Oligodendroglioma, IDH-mutant and 1p/19q-codeleted	Oligodendroglioma, IDH-mutant and 1p/19q-codeleted	II	II	32.5833	M	NA	1	173	0	19	No	No	IDHmut	codel	NO	NO	NO	panel	panel	panel	NO	NO	Jonsson et al 19	Jonsson et al 19
PS356	MSKCC	Oligodendroglioma, IDH-mutant and 1p/19q-codeleted	Anaplastic Oligodendroglioma, IDH-mutant and 1p/19q-codeleted	II	III	59.6833	M	NA	1	52.3	0	44.2	No	Yes	IDHmut	codel	NO	NO	NO	panel	panel	panel	NO	NO	Jonsson et al 19	Jonsson et al 19
PS357	MSKCC	Anaplastic Oligodendroglioma, IDH-mutant and 1p/19q-codeleted	Anaplastic Oligodendroglioma, IDH-mutant and 1p/19q-codeleted	III	III	41.475	M	NA	1	58.6	1	17.7	Yes	Yes	IDHmut	codel	NO	NO	NO	panel	panel	panel	NO	NO	Jonsson et al 19	Jonsson et al 19
PS358	MSKCC	Anaplastic Oligodendroglioma, IDH-mutant and 1p/19q-codeleted	Oligodendroglioma, IDH-mutant and 1p/19q-codeleted	III	II	57.8333	F	NA	1	228	0	82	No	No	IDHmut	codel	NO	NO	NO	panel	panel	panel	NO	NO	Jonsson et al 19	Jonsson et al 19
PS359	MSKCC	Anaplastic Oligodendroglioma, IDH-mutant and 1p/19q-codeleted	Anaplastic Oligodendroglioma, IDH-mutant and 1p/19q-codeleted	III	III	48	F	NA	1	132	1	12	Yes	Yes	IDHmut	codel	NO	NO	NO	panel	panel	panel	NO	NO	Jonsson et al 19	Jonsson et al 19
PS360	MSKCC	Anaplastic Oligodendroglioma, IDH-mutant and 1p/19q-codeleted	Anaplastic Oligodendroglioma, IDH-mutant and 1p/19q-codeleted	III	III	29.9167	M	NA	1	164	0	11	No	No	IDHmut	codel	NO	NO	NO	panel	panel	panel	NO	NO	Jonsson et al 19	Jonsson et al 19
PS365	MSKCC	Glioblastoma, IDH-wildtype	Glioblastoma, IDH-wildtype	IV	IV	50.0167	M	NA	1	38.3	0	36.2	No	No	IDHwt	noncodel	NO	NO	NO	panel	panel	panel	NO	NO	Jonsson et al 19	Jonsson et al 19
PS366	GLSS	Glioblastoma, IDH-wildtype	Glioblastoma, IDH-wildtype	IV	IV	71	M	NA	1	35	1	18	No	No	IDHwt	noncodel	NO	NO	NO	YES	YES	YES	NO	NO	Barthel et al 19	Barthel et al 19
PS367	GLSS	Glioblastoma, IDH-wildtype	Glioblastoma, IDH-wildtype	IV	IV	61	M	NA	1	14	1	10	No	No	IDHwt	noncodel	NO	NO	NO	YES	YES	YES	NO	NO	Barthel et al 19	Barthel et al 19
PS368	GLSS	Glioblastoma, IDH-wildtype	Glioblastoma, IDH-wildtype	IV	IV	64	M	NA	1	12	1	10	No	No	IDHwt	noncodel	NO	NO	NO	YES	YES	YES	NO	NO	Barthel et al 19	Barthel et al 19
PS369	GLSS	Glioblastoma, IDH-wildtype	Glioblastoma, IDH-wildtype	IV	IV	57	M	NA	1	16	1	10	No	No	IDHwt	noncodel	NO	NO	NO	YES	YES	YES	NO	NO	Barthel et al 19	Barthel et al 19
PS370	GLSS	Glioblastoma, IDH-wildtype	Glioblastoma, IDH-wildtype	IV	IV	61	F	NA	0	5	1	1	No	No	IDHwt	noncodel	NO	NO	NO	YES	YES	YES	NO	NO	Barthel et al 19	Barthel et al 19
PS371	GLSS	Glioblastoma, IDH-wildtype	Glioblastoma, IDH-wildtype	IV	IV	56	M	NA	1	14	1	12	No	No	IDHwt	noncodel	NO	NO	NO	YES	YES	YES	NO	NO	Barthel et al 19	Barthel et al 19
PS372	GLSS	Glioblastoma, IDH-wildtype	Glioblastoma, IDH-wildtype	IV	IV	49	M	NA	1	22	1	18	No	No	IDHwt	noncodel	NO	NO	NO	YES	YES	YES	NO	NO	Barthel et al 19	Barthel et al 19
PS373	GLSS	Glioblastoma, IDH-wildtype	Glioblastoma, IDH-wildtype	IV	IV	48	M	NA	1	29	1	10	No	Yes	IDHwt	noncodel	NO	NO	NO	YES	YES	YES	NO	NO	Barthel et al 19	Barthel et al 19
PS374	GLSS	Glioblastoma, IDH-wildtype	Glioblastoma, IDH-wildtype	IV	IV	72	M	NA	NA	13	1	9	No	No	IDHwt	noncodel	NO	NO	NO	YES	YES	YES	NO	NO	Barthel et al 19	Barthel et al 19
PS375	GLSS	Glioblastoma, IDH-wildtype	Glioblastoma, IDH-wildtype	IV	IV	71	M	NA	0	24	1	1	No	No	IDHwt	noncodel	NO	NO	NO	YES	YES	YES	NO	NO	Barthel et al 19	Barthel et al 19
PS376	GLSS	Glioblastoma, IDH-wildtype	Glioblastoma, IDH-wildtype	IV	IV	47	M	NA	0	19	1	10	No	No	IDHwt	noncodel	NO	NO	NO	YES	YES	YES	NO	NO	Barthel et al 19	Barthel et al 19
PS377	GLSS	Glioblastoma, IDH-mutant	Glioblastoma, IDH-mutant	IV	IV	34	M	NA	1	11	1	9	No	Yes	IDHmut	noncodel	NO	NO	NO	YES	YES	YES	NO	NO	Barthel et al 19	Barthel et al 19
PS378	GLSS	Glioblastoma, IDH-wildtype	Glioblastoma, IDH-wildtype	IV	IV	58	F	NA	NA	22	1	5	No	No	IDHwt	noncodel	NO	NO	NO	YES	YES	YES	NO	NO	Barthel et al 19	Barthel et al 19
PS379	GLSS	Glioblastoma, IDH-wildtype	Glioblastoma, IDH-wildtype	IV	IV	47	M	NA	1	37	1	28	No	No	IDHwt	noncodel	NO	NO	NO	YES	YES	YES	NO	NO	Barthel et al 19	Barthel et al 19
PS380	GLSS	Glioblastoma, IDH-wildtype	Glioblastoma, IDH-wildtype	IV	IV	75	F	NA	1	14	1	11	No	No	IDHwt	noncodel	NO	NO	NO	YES	YES	YES	NO	NO	Barthel et al 19	Barthel et al 19
PS381	GLSS	Glioblastoma, IDH-wildtype	Glioblastoma, IDH-wildtype	IV	IV	50	M	NA	0	25	1	16	No	No	IDHwt	noncodel	NO	NO	NO	YES	YES	YES	NO	NO	Barthel et al 19	Barthel et al 19
PS382	GLSS	Glioblastoma, IDH-wildtype	Glioblastoma, IDH-wildtype	IV	IV	65	F	NA	1	14	1	8	No	Yes	IDHwt	noncodel	NO	NO	NO	YES	YES	YES	NO	NO	Barthel et al 19	Barthel et al 19
PS383	GLSS	Glioblastoma, IDH-wildtype	Glioblastoma, IDH-wildtype	IV	IV	54	M	NA	1	23	1	14	No	No	IDHwt	noncodel	NO	NO	NO	YES	YES	YES	NO	NO	Barthel et al 19	Barthel et al 19
PS384	GLSS	Glioblastoma, IDH-wildtype	Glioblastoma, IDH-wildtype	IV	IV	58	F	NA	1	14	1	10	No	No	IDHwt	noncodel	NO	NO	NO	YES	YES	YES	NO	NO	Barthel et al 19	Barthel et al 19
PS385	GLSS	Glioblastoma, IDH-wildtype	Glioblastoma, IDH-wildtype	IV	IV	53	M	NA	1	21	1	10	No	No	IDHwt	noncodel	NO	NO	NO	YES	YES	YES	NO	NO	Barthel et al 19	Barthel et al 19
PS386	GLSS	Glioblastoma, IDH-wildtype	Glioblastoma, IDH-wildtype	IV	IV	58	M	NA	0	13	1	4	No	No	IDHwt	noncodel	NO	NO	NO	YES	YES	YES	NO	NO	Barthel et al 19	Barthel et al 19
PS387	GLSS	Glioblastoma, IDH-wildtype	Glioblastoma, IDH-wildtype	IV	IV	69	M	NA	1	11	1	6	No	No	IDHwt	noncodel	NO	NO	NO	YES	YES	YES	NO	NO	Barthel et al 19	Barthel et al 19
PS388	GLSS	Glioblastoma, IDH-wildtype	Glioblastoma, IDH-wildtype	IV	IV	51	M	NA	1	9	1	8	No	No	IDHwt	noncodel	NO	NO	NO	YES	YES	YES	NO	NO	Barthel et al 19	Barthel et al 19
PS389	GLSS	Glioblastoma, IDH-wildtype	Glioblastoma, IDH-wildtype	IV	IV	51	M	NA	0	5	1	3	No	No	IDHwt	noncodel	NO	NO	NO	YES	YES	YES	NO	NO	Barthel et al 19	Barthel et al 19
PS390	GLSS	Glioblastoma, IDH-wildtype	Glioblastoma, IDH-wildtype	IV	IV	36	M	NA	1	16	1	4	No	No	IDHwt	noncodel	NO	NO	NO	YES	YES	YES	NO	NO	Barthel et al 19	Barthel et al 19
PS391	GLSS	Glioblastoma, IDH-wildtype	Glioblastoma, IDH-wildtype	IV	IV	68	F	NA	1	26	1	9	No	No	IDHwt	noncodel	NO	NO	NO	YES	YES	YES	NO	NO	Barthel et al 19	Barthel et al 19
PS392	GLSS	Glioblastoma, IDH-wildtype	Glioblastoma, IDH-wildtype	IV	IV	68	F	NA	0	6	1	2	No	No	IDHwt	noncodel	NO	NO	NO	YES	YES	YES	NO	NO	Barthel et al 19	Barthel et al 19
PS393	GLSS	Glioblastoma, IDH-wildtype	Glioblastoma, IDH-wildtype	IV	IV	50	F	NA	0	11	1	4	No	No	IDHwt	noncodel	NO	NO	NO	YES	YES	YES	NO	NO	Barthel et al 19	Barthel et al 19
PS394	GLSS	Glioblastoma, IDH-wildtype	Glioblastoma, IDH-wildtype	IV	IV	30	M	NA	1	26	1	19	No	Yes	IDHwt	noncodel	NO	NO	NO	YES	YES	YES	NO	NO	Barthel et al 19	Barthel et al 19
PS395	GLSS	Glioblastoma, IDH-wildtype	Glioblastoma, IDH-wildtype	IV	IV	62	M	NA	1	14	1	7	No	No	IDHwt	noncodel	NO	NO	NO	YES	YES	YES	NO	NO	Barthel et al 19	Barthel et al 19
PS396	GLSS	NA	NA	NA	NA	NA	NA	NA	NA	NA	NA	NA	No	No	IDHwt	noncodel	NO	NO	NO	YES	YES	YES	NO	NO	Barthel et al 19	Barthel et al 19
PS397	GLSS	NA	NA	NA	NA	NA	NA	NA	NA	NA	NA	NA	No	No	IDHwt	noncodel	NO	NO	NO	YES	YES	YES	NO	NO	Barthel et al 19	Barthel et al 19
PS398	GLSS	NA	NA	NA	NA	NA	NA	NA	NA	NA	NA	NA	No	No	IDHwt	noncodel	NO	NO	NO	YES	YES	YES	NO	NO	Barthel et al 19	Barthel et al 19
PS399	GLSS	NA	NA	NA	NA	NA	NA	NA	NA	NA	NA	NA	No	No	IDHwt	noncodel	NO	NO	NO	YES	YES	YES	NO	NO	Barthel et al 19	Barthel et al 19
PS400	GLSS	NA	NA	NA	NA	NA	NA	NA	NA	NA	NA	NA	No	No	IDHwt	noncodel	NO	NO	NO	YES	YES	YES	NO	NO	Barthel et al 19	Barthel et al 19
PS401	GLSS	NA	NA	NA	NA	NA	NA	NA	NA	NA	NA	NA	No	No	IDHwt	noncodel	NO	NO	NO	YES	YES	YES	NO	NO	Barthel et al 19	Barthel et al 19
PS402	GLSS	NA	NA	NA	NA	NA	NA	NA	NA	NA	NA	NA	No	No	IDHwt	noncodel	NO	NO	NO	YES	YES	YES	NO	NO	Barthel et al 19	Barthel et al 19
PS403	GLSS	NA	NA	NA	NA	NA	NA	NA	NA	NA	NA	NA	No	Yes	IDHwt	noncodel	NO	NO	NO	YES	YES	YES	NO	NO	Barthel et al 19	Barthel et al 19
PS404	GLSS	NA	NA	NA	NA	NA	NA	NA	NA	NA	NA	NA	No	No	IDHwt	noncodel	NO	NO	NO	YES	YES	YES	NO	NO	Barthel et al 19	Barthel et al 19
PS405	GLSS	NA	NA	NA	NA	NA	NA	NA	NA	NA	NA	NA	No	No	IDHwt	noncodel	NO	NO	NO	YES	YES	YES	NO	NO	Barthel et al 19	Barthel et al 19
PS406	GLSS	NA	NA	NA	NA	NA	NA	NA	NA	NA	NA	NA	No	No	IDHwt	noncodel	NO	NO	NO	YES	YES	YES	NO	NO	Barthel et al 19	Barthel et al 19
PS407	GLSS	NA	NA	NA	NA	NA	NA	NA	NA	NA	NA	NA	No	No	IDHwt	noncodel	NO	NO	NO	YES	YES	YES	NO	NO	Barthel et al 19	Barthel et al 19
PS408	GLSS	NA	NA	NA	NA	NA	NA	NA	NA	NA	NA	NA	No	No	IDHwt	noncodel	NO	NO	NO	YES	YES	YES	NO	NO	Barthel et al 19	Barthel et al 19
PS409	GLSS	NA	NA	NA	NA	NA	NA	NA	NA	NA	NA	NA	No	No	IDHwt	noncodel	NO	NO	NO	YES	YES	YES	NO	NO	Barthel et al 19	Barthel et al 19
PS410	GLSS	NA	NA	NA	NA	NA	NA	NA	NA	NA	NA	NA	No	Yes	IDHmut	codel	NO	NO	NO	YES	YES	YES	NO	NO	Barthel et al 19	Barthel et al 19
PS411	GLSS	Glioblastoma, IDH-wildtype	Glioblastoma, IDH-wildtype	IV	IV	45	M	NA	1	22	1	11	No	No	IDHwt	noncodel	YES	YES	YES	YES	YES	YES	NO	NO	Barthel et al 19	Barthel et al 19
PS412	GLSS	Glioblastoma, IDH-wildtype	Glioblastoma, IDH-wildtype	IV	IV	62	M	NA	1	25	1	10	No	No	IDHwt	noncodel	YES	YES	YES	YES	YES	YES	NO	NO	Barthel et al 19	Barthel et al 19
PS413	GLSS	Diffuse Astrocytoma, IDH-mutant	Glioblastoma, IDH-mutant	II	IV	37	F	NA	1	37	1	26	No	Yes	IDHmut	noncodel	YES	YES	YES	YES	YES	YES	NO	NO	Barthel et al 19	Barthel et al 19
PS414	GLSS	Glioblastoma, IDH-wildtype	Glioblastoma, IDH-wildtype	IV	IV	67	F	NA	1	25	1	13	No	No	IDHwt	noncodel	YES	YES	YES	YES	YES	YES	NO	NO	Barthel et al 19	Barthel et al 19
PS415	GLSS	Anaplastic Astrocytoma, IDH-wildtype	Glioblastoma, IDH-wildtype	III	IV	24	M	NA	1	40	1	37	No	No	IDHwt	noncodel	YES	YES	YES	YES	YES	YES	NO	NO	Barthel et al 19	Barthel et al 19
PS416	GLSS	Diffuse Astrocytoma, IDH-mutant	Diffuse Astrocytoma, IDH-mutant	II	II	46	F	NA	NA	64	1	25	No	No	IDHmut	noncodel	YES	YES	YES	NO	NO	NO	NO	NO	Barthel et al 19	Barthel et al 19
PS417	GLSS	Diffuse Astrocytoma, IDH-mutant	Anaplastic Astrocytoma, IDH-mutant	II	III	33	F	NA	1	88	1	68	No	Yes	IDHmut	noncodel	NO	NO	NO	YES	YES	YES	NO	NO	Barthel et al 19	Barthel et al 19
PS418	GLSS	Glioblastoma, IDH-wildtype	Glioblastoma, IDH-wildtype	IV	IV	31	F	NA	1	60	1	20	No	No	IDHwt	noncodel	NO	NO	NO	YES	YES	YES	NO	NO	Barthel et al 19	Barthel et al 19
PS419	GLSS	Glioblastoma, IDH-wildtype	Glioblastoma, IDH-wildtype	IV	IV	40	M	NA	1	NA	1	2	No	No	IDHwt	noncodel	NO	NO	NO	YES	YES	YES	NO	NO	Barthel et al 19	Barthel et al 19
PS420	GLSS	Glioblastoma, IDH-wildtype	Glioblastoma, IDH-wildtype	IV	IV	36	F	NA	1	43	1	22	No	No	IDHwt	noncodel	NO	NO	NO	YES	YES	YES	NO	NO	Barthel et al 19	Barthel et al 19
PS421	GLSS	Glioblastoma, IDH-wildtype	Glioblastoma, IDH-wildtype	IV	IV	63	F	NA	1	49	1	45	No	No	IDHwt	noncodel	NO	NO	NO	YES	YES	YES	NO	NO	Barthel et al 19	Barthel et al 19
PS422	GLSS	Glioblastoma, IDH-wildtype	Glioblastoma, IDH-wildtype	IV	IV	53	M	NA	1	32	1	23	No	No	IDHwt	noncodel	NO	NO	NO	YES	YES	YES	NO	NO	Barthel et al 19	Barthel et al 19
PS423	GLSS	Glioblastoma, IDH-wildtype	Glioblastoma, IDH-wildtype	IV	IV	55	M	NA	1	24	1	17	No	No	IDHwt	noncodel	NO	NO	NO	YES	YES	YES	NO	NO	Barthel et al 19	Barthel et al 19
PS424	GLSS	Glioblastoma, IDH-wildtype	Glioblastoma, IDH-wildtype	IV	IV	67	M	NA	1	29	1	17	No	No	IDHwt	noncodel	NO	NO	NO	YES	YES	YES	NO	NO	Barthel et al 19	Barthel et al 19
PS425	GLSS	Glioblastoma, IDH-wildtype	Glioblastoma, IDH-wildtype	IV	IV	47	M	NA	1	19	1	16	No	No	IDHwt	noncodel	NO	NO	NO	YES	YES	YES	NO	NO	Barthel et al 19	Barthel et al 19
PS426	GLSS	Glioblastoma, IDH-wildtype	Glioblastoma, IDH-wildtype	IV	IV	45	F	NA	1	18	1	14	No	Yes	IDHwt	noncodel	NO	NO	NO	YES	YES	YES	NO	NO	Barthel et al 19	Barthel et al 19
PS427	GLSS	Oligodendroglioma, IDH-mutant and 1p/19q-codeleted	Anaplastic Oligodendroglioma, IDH-mutant and 1p/19q-codeleted	II	III	45	F	NA	NA	257	1	239	No	No	IDHmut	codel	YES	YES	YES	NO	NO	NO	NO	NO	Barthel et al 19	Barthel et al 19
PS428	GLSS	Glioblastoma, IDH-wildtype	Glioblastoma, IDH-wildtype	IV	IV	46	M	NA	1	110	0	48	No	No	IDHwt	noncodel	YES	YES	YES	NO	NO	NO	NO	NO	Barthel et al 19	Barthel et al 19
PS429	GLSS	Glioblastoma, IDH-wildtype	Glioblastoma, IDH-wildtype	IV	IV	53	F	NA	NA	62	1	47	No	No	IDHwt	noncodel	YES	YES	YES	NO	NO	NO	NO	NO	Barthel et al 19	Barthel et al 19
PS430	GLSS	Diffuse Astrocytoma, IDH-mutant	Diffuse Astrocytoma, IDH-mutant	II	II	40	F	NA	NA	203	0	52	No	No	IDHmut	noncodel	YES	YES	YES	NO	NO	NO	NO	NO	Barthel et al 19	Barthel et al 19
PS431	GLSS	Oligodendroglioma, IDH-mutant and 1p/19q-codeleted	Anaplastic Oligodendroglioma, IDH-mutant and 1p/19q-codeleted	II	III	52	F	NA	1	93	1	56	No	No	IDHmut	codel	YES	YES	YES	NO	NO	NO	NO	NO	Barthel et al 19	Barthel et al 19
PS432	GLSS	Diffuse Astrocytoma, IDH-mutant	Diffuse Astrocytoma, IDH-mutant	II	II	33	F	NA	NA	157	1	111	No	No	IDHmut	noncodel	YES	YES	YES	NO	NO	NO	NO	NO	Barthel et al 19	Barthel et al 19
PS433	GLSS	Anaplastic Astrocytoma, IDH-mutant	Anaplastic Astrocytoma, IDH-mutant	III	III	20	M	NA	NA	183	0	129	No	No	IDHmut	noncodel	YES	YES	YES	NO	NO	NO	NO	NO	Barthel et al 19	Barthel et al 19
PS434	GLSS	Glioblastoma, IDH-mutant	NA	IV	NA	26	M	NA	1	80	1	65	No	No	IDHmut	noncodel	YES	YES	YES	NO	NO	NO	NO	NO	Barthel et al 19	Barthel et al 19
PS435	GLSS	Diffuse Astrocytoma, IDH-mutant	Glioblastoma, IDH-mutant	II	IV	41	M	NA	NA	75	0	54	No	No	IDHmut	noncodel	YES	YES	YES	NO	NO	NO	NO	NO	Barthel et al 19	Barthel et al 19
PS436	GLSS	Anaplastic Astrocytoma, IDH-mutant	Glioblastoma, IDH-mutant	III	IV	33	M	NA	NA	98	1	59	No	No	IDHmut	noncodel	YES	YES	YES	NO	NO	NO	NO	NO	Barthel et al 19	Barthel et al 19
PS437	GLSS	Glioblastoma, IDH-wildtype	Glioblastoma, IDH-wildtype	IV	IV	49	M	NA	1	74	0	56	No	No	IDHwt	noncodel	YES	YES	YES	NO	NO	NO	NO	NO	Barthel et al 19	Barthel et al 19
PS438	GLSS	Glioblastoma, IDH-wildtype	Glioblastoma, IDH-wildtype	IV	IV	55	M	NA	1	38	1	3	No	No	IDHwt	noncodel	YES	YES	YES	NO	NO	NO	NO	NO	Barthel et al 19	Barthel et al 19
PS439	GLSS	Glioblastoma, IDH-wildtype	Glioblastoma, IDH-wildtype	IV	IV	37	F	NA	0	91	0	6	No	No	IDHwt	noncodel	YES	YES	YES	NO	NO	NO	NO	NO	Barthel et al 19	Barthel et al 19
PS440	GLSS	Anaplastic Astrocytoma, IDH-wildtype	Glioblastoma, IDH-wildtype	III	IV	46	M	NA	1	36	1	24	No	No	IDHwt	noncodel	YES	YES	YES	NO	NO	NO	NO	NO	Barthel et al 19	Barthel et al 19
PS441	GLSS	Glioblastoma, IDH-mutant	Glioblastoma, IDH-mutant	IV	IV	25	M	NA	1	119	0	99	No	No	IDHmut	noncodel	YES	YES	YES	NO	NO	NO	NO	NO	Barthel et al 19	Barthel et al 19
PS442	GLSS	Glioblastoma, IDH-wildtype	Glioblastoma, IDH-wildtype	IV	IV	68	M	NA	1	10	1	4	No	No	IDHwt	noncodel	YES	YES	YES	NO	NO	NO	NO	NO	Barthel et al 19	Barthel et al 19
PS443	GLSS	Glioblastoma, IDH-wildtype	Glioblastoma, IDH-wildtype	IV	IV	65	M	NA	1	12	0	8	No	No	IDHwt	noncodel	YES	YES	YES	NO	NO	NO	NO	NO	Barthel et al 19	Barthel et al 19
PS444	GLSS	Glioblastoma, IDH-wildtype	Glioblastoma, IDH-wildtype	IV	IV	60	M	NA	1	19	1	9	No	No	IDHwt	noncodel	YES	YES	YES	YES	YES	YES	NO	NO	Barthel et al 19	Barthel et al 19
PS445	GLSS	Glioblastoma, IDH-wildtype	Glioblastoma, IDH-wildtype	IV	IV	77	M	NA	1	44	1	34	No	No	IDHwt	noncodel	YES	YES	YES	NO	NO	NO	NO	NO	Barthel et al 19	Barthel et al 19
PS446	GLSS	Diffuse Astrocytoma, IDH-mutant	Glioblastoma, IDH-mutant	II	IV	30	M	NA	1	80	1	76	No	Yes	IDHmut	noncodel	YES	YES	YES	YES	YES	YES	NO	NO	Barthel et al 19	Barthel et al 19
PS447	GLSS	Diffuse Astrocytoma, IDH-mutant	Glioblastoma, IDH-mutant	II	IV	21	M	NA	1	138	1	114	No	No	IDHmut	noncodel	YES	YES	YES	NO	NO	NO	NO	NO	Barthel et al 19	Barthel et al 19
PS448	GLSS	Glioblastoma, IDH-wildtype	Glioblastoma, IDH-wildtype	IV	IV	49	M	NA	1	6	0	4	No	No	IDHwt	noncodel	YES	YES	YES	NO	NO	NO	NO	NO	Barthel et al 19	Barthel et al 19
PS449	GLSS	Anaplastic Astrocytoma, IDH-mutant	Glioblastoma, IDH-mutant	III	IV	40	M	NA	1	27	1	19	No	Yes	IDHmut	noncodel	YES	YES	YES	NO	NO	NO	NO	NO	Barthel et al 19	Barthel et al 19
PS450	GLSS	Glioblastoma, IDH-wildtype	Glioblastoma, IDH-wildtype	IV	IV	44	M	NA	1	22	1	20	No	No	IDHwt	noncodel	YES	YES	YES	NO	NO	NO	NO	NO	Barthel et al 19	Barthel et al 19
PS451	GLSS	Glioblastoma, IDH-wildtype	Glioblastoma, IDH-wildtype	IV	IV	53	M	NA	NA	21	1	14	No	Yes	IDHwt	noncodel	YES	YES	YES	NO	NO	NO	NO	NO	Barthel et al 19	Barthel et al 19
PS452	GLSS	Anaplastic Astrocytoma, IDH-wildtype	Anaplastic Astrocytoma, IDH-wildtype	III	III	41	M	NA	1	53	0	7	No	No	IDHwt	noncodel	YES	YES	YES	NO	NO	NO	NO	NO	Barthel et al 19	Barthel et al 19
PS453	GLSS	Oligodendroglioma, IDH-mutant and 1p/19q-codeleted	Oligodendroglioma, IDH-mutant and 1p/19q-codeleted	II	II	45	F	NA	NA	122	0	79	No	No	IDHmut	codel	YES	YES	YES	NO	NO	NO	NO	NO	Barthel et al 19	Barthel et al 19
PS454	GLSS	Glioblastoma, IDH-wildtype	Glioblastoma, IDH-wildtype	IV	IV	72	M	NA	1	11	1	8	No	Yes	IDHwt	noncodel	YES	YES	YES	NO	NO	NO	NO	NO	Barthel et al 19	Barthel et al 19
PS455	GLSS	Diffuse Astrocytoma, IDH-mutant	Glioblastoma, IDH-mutant	II	IV	31	F	NA	1	135	1	115	No	No	IDHmut	noncodel	YES	YES	YES	NO	NO	NO	NO	NO	Barthel et al 19	Barthel et al 19
PS456	GLSS	Oligodendroglioma, IDH-mutant and 1p/19q-codeleted	Oligodendroglioma, IDH-mutant and 1p/19q-codeleted	II	II	56	M	NA	NA	124	0	51	No	No	IDHmut	codel	YES	YES	YES	NO	NO	NO	NO	NO	Barthel et al 19	Barthel et al 19
PS457	GLSS	Glioblastoma, IDH-wildtype	Glioblastoma, IDH-wildtype	IV	IV	52	M	NA	1	30	0	22	No	No	IDHwt	noncodel	YES	YES	YES	NO	NO	NO	NO	NO	Barthel et al 19	Barthel et al 19
PS458	GLSS	Glioblastoma, IDH-wildtype	Glioblastoma, IDH-wildtype	IV	IV	59	M	NA	1	36	1	21	No	Yes	IDHwt	noncodel	YES	YES	YES	NO	NO	NO	NO	NO	Barthel et al 19	Barthel et al 19
PS459	GLSS	Oligodendroglioma, IDH-mutant and 1p/19q-codeleted	Anaplastic Oligodendroglioma, IDH-mutant and 1p/19q-codeleted	II	III	33	F	NA	1	175	0	172	No	No	IDHmut	codel	YES	YES	YES	NO	NO	NO	NO	NO	Barthel et al 19	Barthel et al 19
PS460	GLSS	Oligodendroglioma, IDH-mutant and 1p/19q-codeleted	Oligodendroglioma, IDH-mutant and 1p/19q-codeleted	II	II	48	M	NA	1	133	0	117	No	No	IDHmut	codel	YES	YES	YES	NO	NO	NO	NO	NO	Barthel et al 19	Barthel et al 19
PS461	GLSS	Diffuse Astrocytoma, IDH-mutant	Glioblastoma, IDH-mutant	II	IV	51	M	NA	NA	97	0	61	No	No	IDHmut	noncodel	YES	YES	YES	NO	NO	NO	NO	NO	Barthel et al 19	Barthel et al 19
PS462	GLSS	Diffuse Astrocytoma, IDH-mutant	Glioblastoma, IDH-mutant	II	IV	24	M	NA	1	83	1	74	No	Yes	IDHmut	noncodel	NO	NO	NO	YES	YES	YES	NO	NO	Barthel et al 19	Barthel et al 19
PS463	GLSS	Diffuse Astrocytoma, IDH-mutant	Glioblastoma, IDH-mutant	II	IV	34	M	NA	0	54	1	41	No	No	IDHmut	noncodel	NO	NO	NO	YES	YES	YES	NO	NO	Barthel et al 19	Barthel et al 19
PS464	GLSS	Diffuse Astrocytoma, IDH-mutant	Anaplastic Astrocytoma, IDH-mutant	II	III	30	M	NA	0	109	0	81	No	No	IDHmut	noncodel	NO	NO	NO	YES	YES	YES	NO	NO	Barthel et al 19	Barthel et al 19
PS465	GLSS	Anaplastic Oligodendroglioma, IDH-mutant and 1p/19q-codeleted	Anaplastic Oligodendroglioma, IDH-mutant and 1p/19q-codeleted	III	III	38	M	NA	1	163	0	72	No	No	IDHmut	codel	NO	NO	NO	YES	YES	YES	NO	NO	Barthel et al 19	Barthel et al 19
PS466	GLSS	Oligodendroglioma, IDH-mutant and 1p/19q-codeleted	Anaplastic Oligodendroglioma, IDH-mutant and 1p/19q-codeleted	II	III	33	M	NA	1	122	0	83	No	Yes	IDHmut	codel	NO	NO	NO	YES	YES	YES	NO	NO	Barthel et al 19	Barthel et al 19
PS467	GLSS	Diffuse Astrocytoma, IDH-mutant	Anaplastic Astrocytoma, IDH-mutant	II	III	48	F	NA	0	84	1	62	No	No	IDHmut	noncodel	NO	NO	NO	YES	YES	YES	NO	NO	Barthel et al 19	Barthel et al 19
PS468	GLSS	Oligodendroglioma, IDH-mutant and 1p/19q-codeleted	Anaplastic Oligodendroglioma, IDH-mutant and 1p/19q-codeleted	II	III	29	F	NA	0	101	0	41	No	No	IDHmut	codel	NO	NO	NO	YES	YES	YES	NO	NO	Barthel et al 19	Barthel et al 19
PS469	GLSS	Diffuse Astrocytoma, IDH-mutant	Anaplastic Astrocytoma, IDH-mutant	II	III	30	M	NA	1	82	1	56	No	No	IDHmut	noncodel	NO	NO	NO	YES	YES	YES	NO	NO	Barthel et al 19	Barthel et al 19
PS470	GLSS	Anaplastic Astrocytoma, IDH-mutant	Glioblastoma, IDH-mutant	III	IV	32	F	NA	0	72	0	66	No	No	IDHmut	noncodel	NO	NO	NO	YES	YES	YES	NO	NO	Barthel et al 19	Barthel et al 19
PS471	GLSS	Diffuse Astrocytoma, IDH-mutant	Glioblastoma, IDH-mutant	II	IV	38	M	NA	0	43	1	17	No	No	IDHmut	noncodel	NO	NO	NO	YES	YES	YES	NO	NO	Barthel et al 19	Barthel et al 19
PS472	GLSS	Glioblastoma, IDH-wildtype	Glioblastoma, IDH-wildtype	IV	IV	42	F	NA	1	114	0	83	No	Yes	IDHwt	noncodel	YES	YES	YES	YES	YES	YES	NO	NO	Barthel et al 19	Barthel et al 19
PS473	GLSS	Oligodendroglioma, IDH-mutant and 1p/19q-codeleted	Oligodendroglioma, IDH-mutant and 1p/19q-codeleted	II	II	41	F	NA	NA	161	0	66	No	No	IDHmut	codel	NO	NO	NO	YES	YES	YES	NO	NO	Barthel et al 19	Barthel et al 19
PS474	GLSS	Anaplastic Astrocytoma, IDH-mutant	Glioblastoma, IDH-mutant	III	IV	30	M	NA	0	68	1	56	No	No	IDHmut	noncodel	YES	YES	YES	YES	YES	YES	NO	NO	Barthel et al 19	Barthel et al 19
PS475	GLSS	Anaplastic Astrocytoma, IDH-mutant	Glioblastoma, IDH-mutant	III	IV	28	F	NA	0	41	1	26	No	No	IDHmut	noncodel	YES	YES	YES	YES	YES	YES	NO	NO	Barthel et al 19	Barthel et al 19
PS476	GLSS	Glioblastoma, IDH-wildtype	Glioblastoma, IDH-wildtype	IV	IV	45	F	NA	1	39	0	19	No	No	IDHwt	noncodel	YES	YES	YES	YES	YES	YES	NO	NO	Barthel et al 19	Barthel et al 19
PS477	GLSS	Glioblastoma, IDH-wildtype	Glioblastoma, IDH-wildtype	IV	IV	49	M	NA	0	10	0	4	No	No	IDHwt	noncodel	YES	YES	YES	YES	YES	YES	NO	NO	Barthel et al 19	Barthel et al 19
PS478	GLSS	Glioblastoma, IDH-wildtype	Glioblastoma, IDH-wildtype	IV	IV	55	F	NA	1	51	1	51	No	No	IDHwt	noncodel	NO	NO	NO	YES	YES	YES	NO	NO	Barthel et al 19	Barthel et al 19
PS479	GLSS	Glioblastoma, IDH-wildtype	Glioblastoma, IDH-wildtype	IV	IV	56	M	NA	1	15	1	15	No	No	IDHwt	noncodel	NO	NO	NO	YES	YES	YES	NO	NO	Barthel et al 19	Barthel et al 19
PS480	GLSS	Glioblastoma, IDH-wildtype	Glioblastoma, IDH-wildtype	IV	IV	69	M	NA	1	13	1	13	No	No	IDHwt	noncodel	NO	NO	NO	YES	YES	YES	NO	NO	Barthel et al 19	Barthel et al 19
PS481	GLSS	Glioblastoma, IDH-wildtype	Glioblastoma, IDH-wildtype	IV	IV	68	M	NA	1	21	1	21	No	No	IDHwt	noncodel	NO	NO	NO	YES	YES	YES	NO	NO	Barthel et al 19	Barthel et al 19
PS482	GLSS	Glioblastoma, IDH-wildtype	Glioblastoma, IDH-wildtype	IV	IV	63	M	NA	1	18	1	18	No	No	IDHwt	noncodel	NO	NO	NO	YES	YES	YES	NO	NO	Barthel et al 19	Barthel et al 19
PS483	GLSS	Anaplastic Astrocytoma, IDH-wildtype	Glioblastoma, IDH-wildtype	III	IV	45	M	NA	1	24	1	24	No	No	IDHwt	noncodel	NO	NO	NO	YES	YES	YES	NO	NO	Barthel et al 19	Barthel et al 19
PS484	GLSS	Glioblastoma, IDH-wildtype	Glioblastoma, IDH-wildtype	IV	IV	70	F	NA	1	14	1	14	No	No	IDHwt	noncodel	NO	NO	NO	YES	YES	YES	NO	NO	Barthel et al 19	Barthel et al 19
PS485	GLSS	Glioblastoma, IDH-wildtype	Glioblastoma, IDH-wildtype	IV	IV	68	M	NA	1	8	1	8	No	No	IDHwt	noncodel	NO	NO	NO	YES	YES	YES	NO	NO	Barthel et al 19	Barthel et al 19
PS486	GLSS	Glioblastoma, IDH-wildtype	Glioblastoma, IDH-wildtype	IV	IV	61	M	NA	1	11	1	11	No	No	IDHwt	noncodel	NO	NO	NO	YES	YES	YES	NO	NO	Barthel et al 19	Barthel et al 19
PS487	GLSS	Glioblastoma, IDH-wildtype	Glioblastoma, IDH-wildtype	IV	IV	62	F	NA	1	24	1	24	No	No	IDHwt	noncodel	NO	NO	NO	YES	YES	YES	NO	NO	Barthel et al 19	Barthel et al 19
PS488	GLSS	Glioblastoma, IDH-wildtype	Glioblastoma, IDH-wildtype	IV	IV	37	F	NA	NA	17	0	13	No	No	IDHwt	noncodel	YES	YES	YES	NO	NO	NO	NO	NO	Barthel et al 19	Barthel et al 19
PS489	GLSS	Oligodendroglioma, IDH-mutant and 1p/19q-codeleted	Oligodendroglioma, IDH-mutant and 1p/19q-codeleted	II	II	27	M	NA	0	148	0	108	No	No	IDHmut	codel	NO	NO	NO	YES	YES	YES	NO	NO	Barthel et al 19	Barthel et al 19
PS490	GLSS	Anaplastic Astrocytoma, IDH-wildtype	Glioblastoma, IDH-wildtype	III	IV	46	M	NA	1	15	0	12	No	No	IDHwt	noncodel	NO	NO	NO	YES	YES	YES	NO	NO	Barthel et al 19	Barthel et al 19
PS491	GLSS	Oligodendroglioma, IDH-mutant and 1p/19q-codeleted	Oligodendroglioma, IDH-mutant and 1p/19q-codeleted	II	II	28	M	NA	1	101	0	40	No	No	IDHmut	codel	NO	NO	NO	YES	YES	YES	NO	NO	Barthel et al 19	Barthel et al 19
PS492	GLSS	Glioblastoma, IDH-wildtype	Glioblastoma, IDH-wildtype	IV	IV	47	F	NA	0	59	1	35	No	No	IDHwt	noncodel	NO	NO	NO	YES	YES	YES	NO	NO	Barthel et al 19	Barthel et al 19
PS493	GLSS	Oligodendroglioma, IDH-mutant and 1p/19q-codeleted	Anaplastic Oligodendroglioma, IDH-mutant and 1p/19q-codeleted	II	III	21	M	NA	0	61	0	43	No	No	IDHmut	codel	NO	NO	NO	YES	YES	YES	NO	NO	Barthel et al 19	Barthel et al 19
PS494	GLSS	Diffuse Astrocytoma, IDH-mutant	Anaplastic Astrocytoma, IDH-mutant	II	III	38	M	NA	1	117	0	60	No	No	IDHmut	noncodel	NO	NO	NO	YES	YES	YES	NO	NO	Barthel et al 19	Barthel et al 19
PS495	GLSS	Oligodendroglioma, IDH-mutant and 1p/19q-codeleted	Anaplastic Oligodendroglioma, IDH-mutant and 1p/19q-codeleted	II	IV	34	M	NA	0	154	0	99	No	No	IDHmut	codel	NO	NO	NO	YES	YES	YES	NO	NO	Barthel et al 19	Barthel et al 19
PS496	GLSS	Glioblastoma, IDH-wildtype	Glioblastoma, IDH-wildtype	IV	IV	38	M	NA	1	14	1	4	No	No	IDHwt	noncodel	NO	NO	NO	YES	YES	YES	NO	NO	Barthel et al 19	Barthel et al 19
PS497	GLSS	Diffuse Astrocytoma, IDH-mutant	Glioblastoma, IDH-mutant	II	IV	27	F	NA	1	51	1	26	No	No	IDHmut	noncodel	NO	NO	NO	YES	YES	YES	NO	NO	Barthel et al 19	Barthel et al 19
PS498	GLSS	Diffuse Astrocytoma, IDH-mutant	Diffuse Astrocytoma, IDH-mutant	II	II	23	M	NA	0	83	0	37	No	No	IDHmut	noncodel	NO	NO	NO	YES	YES	YES	NO	NO	Barthel et al 19	Barthel et al 19
PS499	GLSS	Diffuse Astrocytoma, IDH-mutant	Glioblastoma, IDH-mutant	II	IV	35	M	NA	1	114	0	111	No	Yes	IDHmut	noncodel	NO	NO	NO	YES	YES	YES	NO	NO	Barthel et al 19	Barthel et al 19
PS500	GLSS	Diffuse Astrocytoma, IDH-mutant	Diffuse Astrocytoma, IDH-mutant	II	II	28	M	NA	1	140	0	89	No	No	IDHmut	noncodel	NO	NO	NO	YES	YES	YES	NO	NO	Barthel et al 19	Barthel et al 19
PS501	GLSS	Oligodendroglioma, IDH-mutant and 1p/19q-codeleted	Anaplastic Oligodendroglioma, IDH-mutant and 1p/19q-codeleted	II	III	62	F	NA	1	55	1	31	No	Yes	IDHmut	codel	NO	NO	NO	YES	YES	YES	NO	NO	Barthel et al 19	Barthel et al 19
PS502	GLSS	Oligodendroglioma, IDH-mutant and 1p/19q-codeleted	Oligodendroglioma, IDH-mutant and 1p/19q-codeleted	II	II	33	M	NA	1	188	0	63	No	No	IDHmut	codel	NO	NO	NO	YES	YES	YES	NO	NO	Barthel et al 19	Barthel et al 19
PS503	GLSS	Diffuse Astrocytoma, IDH-mutant	Anaplastic Astrocytoma, IDH-mutant	II	III	40	M	NA	1	34	0	34	No	No	IDHmut	noncodel	NO	NO	NO	YES	YES	YES	NO	NO	Barthel et al 19	Barthel et al 19
PS504	GLSS	Diffuse Astrocytoma, IDH-mutant	Diffuse Astrocytoma, IDH-mutant	II	II	29	M	NA	0	68	0	18	No	No	IDHmut	noncodel	NO	NO	NO	YES	YES	YES	NO	NO	Barthel et al 19	Barthel et al 19
PSX01	CGGA	Glioblastoma, IDH-wildtype	Glioblastoma, IDH-wildtype	IV	IV	46	M	Asian	1	10.8333	0	NA	No	No	IDHwt	noncodel	NO	NO	NO	YES	YES	YES	YES	YES	SAVI	CNVkit
PSX02	CGGA	Diffuse Astrocytoma, IDH-mutant	Glioblastoma, IDH-mutant	II	IV	32	M	Asian	1	32.9667	0	NA	No	Yes	IDHmut	noncodel	NO	NO	NO	YES	YES	YES	YES	YES	SAVI	CNVkit
PSX03	CGGA	Diffuse Astrocytoma, IDH-mutant	Anaplastic Astrocytoma, IDH-mutant	III	III	22	F	Asian	1	18.9667	1	11.7	No	No	IDHmut	noncodel	NO	YES	NO	YES	NO	YES	NO	NO	SAVI	CNVkit
PSX04	CGGA	Diffuse Astrocytoma, IDH-wildtype	Glioblastoma, IDH-wildtype	III	IV	31	F	Asian	1	24.3	0	NA	No	No	IDHwt	noncodel	NO	NO	NO	YES	YES	YES	YES	NO	SAVI	CNVkit
PSX05	CGGA	Diffuse Astrocytoma, IDH-wildtype	Glioblastoma, IDH-wildtype	II	IV	55	M	Asian	1	41.1	0	NA	No	No	IDHwt	noncodel	NO	NO	NO	YES	YES	YES	YES	YES	SAVI	CNVkit
PSX06	CGGA	Glioblastoma, IDH-mutant	Glioblastoma, IDH-mutant	IV	IV	36	M	Asian	1	13.0333	1	NA	No	No	IDHmut	noncodel	NO	NO	NO	YES	YES	YES	NO	NO	SAVI	CNVkit
PSX07	CGGA	Glioblastoma, IDH-mutant	Glioblastoma, IDH-mutant	IV	IV	26	M	Asian	1	NA	NA	19.2	No	Yes	IDHmut	noncodel	NO	NO	NO	YES	YES	YES	YES	YES	SAVI	CNVkit
PSX08	CGGA	Diffuse Astrocytoma, IDH-mutant	Glioblastoma, IDH-mutant	II	IV	26	F	Asian	1	38.0667	0	29.3	NA	No	IDHmut	noncodel	NO	NO	NO	NO	YES	NO	YES	YES	NA	NA
PSX09	CGGA	Oligodendroglioma, IDH-mutant and 1p/19q-codeleted	Oligodendroglioma, IDH-mutant and 1p/19q-codeleted	II	II	48	M	Asian	0	59.3333	0	88.5	No	No	IDHmut	codel	NO	NO	NO	YES	YES	YES	YES	YES	SAVI	CNVkit
PSX10	CGGA	Diffuse Astrocytoma, IDH-mutant	Glioblastoma, IDH-mutant	II	IV	47	M	Asian	0	NA	NA	NA	No	No	IDHmut	noncodel	NO	NO	NO	YES	YES	YES	NO	YES	NA	NA
PSX11	CGGA	Diffuse Astrocytoma, IDH-wildtype	Glioblastoma, IDH-wildtype	II	IV	43	M	Asian	1	40.8667	0	NA	No	No	IDHwt	noncodel	NO	NO	NO	YES	YES	YES	NO	YES	SAVI	CNVkit
PSX12	CGGA	Glioblastoma, IDH-mutant	Glioblastoma, IDH-mutant	IV	IV	48	F	Asian	1	NA	NA	NA	No	No	IDHmut	noncodel	NO	NO	NO	YES	YES	YES	NO	YES	NA	NA
PSX13	CGGA	Oligodendroglioma, IDH-mutant and 1p/19q-codeleted	Anaplastic Oligodendroglioma, IDH-mutant and 1p/19q-codeleted	II	III	40	F	Asian	0	21.0667	0	NA	No	No	IDHmut	codel	NO	NO	NO	YES	YES	YES	YES	YES	SAVI	CNVkit
PSX14	CGGA	Glioblastoma, IDH-mutant	Glioblastoma, IDH-mutant	IV	IV	44	M	Asian	1	NA	NA	NA	No	No	IDHmut	noncodel	NO	NO	NO	YES	YES	YES	YES	YES	SAVI	CNVkit
PSX15	CUHK	Glioblastoma, IDH-mutant	Glioblastoma, IDH-mutant	IV	IV	33	F	Asian	1	48.7333	1	26.6	No	No	IDHmut	noncodel	NO	NO	NO	YES	YES	YES	YES	YES	SAVI	CNVkit
PSX16	CUHK	Glioblastoma, IDH-wildtype	Glioblastoma, IDH-wildtype	IV	IV	54	M	Asian	NA	16.2333	1	8.8	No	No	IDHwt	noncodel	NO	NO	NO	YES	YES	YES	YES	YES	SAVI	CNVkit
PSX17	CUHK	Glioblastoma, IDH-wildtype	Glioblastoma, IDH-mutant	IV	IV	57	M	Asian	NA	42.7	0	8.43333	NO	No	IDHmut	noncodel	NO	NO	NO	NO	YES	NO	YES	YES	NA	NA
PSX18	CUHK	Glioblastoma, IDH-wildtype	Glioblastoma, IDH-wildtype	IV	IV	62	M	Asian	NA	25.1	1	17.6	No	No	IDHwt	noncodel	NO	NO	NO	YES	YES	YES	YES	YES	SAVI	CNVkit
PSX19	CUHK	Glioblastoma, IDH-wildtype	Glioblastoma, IDH-wildtype	IV	IV	59	M	Asian	NA	16.5667	1	9.9	No	No	IDHwt	noncodel	NO	NO	NO	YES	YES	YES	YES	NO	SAVI	CNVkit
PSX20	CUHK	Glioblastoma, IDH-wildtype	Glioblastoma, IDH-wildtype	IV	IV	57	M	Asian	NA	10.3	1	4	No	No	IDHwt	noncodel	NO	NO	NO	YES	YES	YES	YES	YES	SAVI	CNVkit
