# Supplementary material for: MYC amplification at diagnosis drives therapy-induced hypermutation of recurrent glioma
Source: Research Square preprint supplement (doi:10.21203/rs.3.rs-138020/v1), 2021-01-05
Supplement: Supplementary file 3 [file 206b762a254c281b3dd4331b.xlsx]

## Sheet: Sheet1
Patient_ID	Cohorts	Asian	WGS_normal	WGS_Initial	WGS_Recurrence	WES_Normal	WES_Initial	WES_Recurrence	RNAseq_Initial	RNAseq_Recurrence	Mutation_source	CNA_source
PS001	INCB	no	NO	NO	NO	YES	YES	YES	YES	YES	Wang et al	Wang et al
PS002	INCB	no	NO	NO	NO	YES	YES	YES	YES	YES	Wang et al	Wang et al
PS003	INCB	no	NO	NO	NO	YES	YES	YES	YES	YES	Wang et al	Wang et al
PS004	INCB	no	NO	NO	NO	YES	YES	YES	YES	YES	Wang et al	Wang et al
PS005	INCB	no	NO	NO	NO	YES	YES	YES	YES	YES	Wang et al	Wang et al
PS006	INCB	no	NO	NO	NO	YES	YES	YES	YES	YES	Wang et al	Wang et al
PS007	INCB	no	NO	NO	NO	YES	YES	YES	YES	YES	Wang et al	Wang et al
PS008	INCB	no	NO	NO	NO	YES	YES	YES	YES	YES	Wang et al	Wang et al
PS009	INCB	no	NO	NO	NO	YES	YES	YES	YES	YES	Wang et al	Wang et al
PS010	INCB	no	NO	NO	NO	YES	YES	YES	YES	YES	Wang et al	Wang et al
PS011	INCB	no	NO	NO	NO	YES	YES	YES	NO	NO	Wang et al	Wang et al
PS012	INCB	no	NO	NO	NO	YES	YES	YES	YES	YES	Wang et al	Wang et al
PS013	INCB	no	NO	NO	NO	YES	YES	YES	NO	NO	Wang et al	Wang et al
PS014	INCB	no	NO	NO	NO	YES	YES	YES	NO	NO	Wang et al	Wang et al
PS015	INCB	no	NO	NO	NO	YES	YES	YES	NO	NO	Wang et al	Wang et al
PS016	INCB	no	NO	NO	NO	YES	YES	YES	NO	NO	Wang et al	Wang et al
PS017	INCB	no	NO	NO	NO	YES	YES	YES	NO	YES	Wang et al	Wang et al
PS018	INCB	no	NO	NO	NO	YES	YES	YES	NO	YES	Wang et al	Wang et al
PS019	INCB	no	NO	NO	NO	YES	YES	YES	YES	YES	Wang et al	Wang et al
PS020	MD Anderson	no	NO	NO	NO	YES	YES	YES	YES	YES	Wang et al	Wang et al
PS021	MD Anderson	no	NO	NO	NO	YES	YES	YES	YES	YES	Wang et al	Wang et al
PS022	MD Anderson	no	NO	NO	NO	YES	YES	YES	YES	YES	Wang et al	Wang et al
PS023	MD Anderson	no	NO	NO	NO	YES	YES	YES	YES	YES	Wang et al	Wang et al
PS024	MD Anderson	no	NO	NO	NO	YES	YES	YES	YES	YES	Wang et al	Wang et al
PS025	MD Anderson	no	NO	NO	NO	YES	YES	YES	YES	YES	Wang et al	Wang et al
PS026	MD Anderson	no	NO	NO	NO	YES	YES	YES	YES	YES	Wang et al	Wang et al
PS027	MD Anderson	no	NO	NO	NO	YES	YES	YES	YES	YES	Wang et al	Wang et al
PS028	MD Anderson	no	NO	NO	NO	YES	YES	YES	NO	YES	Wang et al	Wang et al
PS029	MD Anderson	no	NO	NO	NO	YES	YES	YES	YES	YES	Wang et al	Wang et al
PS030	TCGA-GBM	no	YES	YES	YES	YES	YES	YES	YES	YES	Wang et al	Wang et al
PS031	TCGA-GBM	no	YES	YES	YES	YES	YES	YES	NO	YES	Wang et al	Wang et al
PS032	TCGA-GBM	no	YES	YES	YES	YES	YES	YES	NO	YES	Wang et al	Wang et al
PS033	TCGA-GBM	no	YES	YES	YES	YES	YES	YES	YES	YES	Wang et al	Wang et al
PS034	TCGA-GBM	no	YES	YES	YES	YES	YES	YES	YES	YES	Wang et al	Wang et al
PS035	TCGA-GBM	no	YES	YES	YES	YES	YES	YES	YES	YES	Wang et al	Wang et al
PS036	TCGA-GBM	no	YES	YES	YES	YES	YES	YES	NO	YES	Wang et al	Wang et al
PS037	TCGA-GBM	no	NO	NO	NO	YES	YES	YES	NO	YES	Wang et al	Wang et al
PS038	TCGA-GBM	no	YES	YES	YES	YES	YES	YES	YES	YES	Wang et al	Wang et al
PS039	TCGA-GBM	no	YES	YES	YES	YES	YES	YES	NO	YES	Wang et al	Wang et al
PS040	TCGA-GBM	no	NO	NO	NO	YES	YES	YES	NO	YES	Wang et al	Wang et al
PS041	TCGA-GBM	no	YES	YES	YES	YES	YES	YES	NO	YES	Wang et al	Wang et al
PS042	TCGA-GBM	no	NO	NO	NO	YES	YES	YES	YES	YES	Wang et al	Wang et al
PS043	UCSF	no	NO	NO	NO	YES	YES	YES	NO	NO	Wang et al	Wang et al
PS044	UCSF	no	NO	NO	NO	YES	YES	YES	NO	NO	Wang et al	Wang et al
PS045	UCSF	no	NO	NO	NO	YES	YES	YES	NO	NO	Wang et al	Wang et al
PS046	UCSF	no	NO	NO	NO	YES	YES	YES	NO	NO	Wang et al	Wang et al
PS047	UCSF	no	NO	NO	NO	YES	YES	YES	NO	NO	Wang et al	Wang et al
PS048	UCSF	no	NO	NO	NO	YES	YES	YES	NO	NO	Wang et al	Wang et al
PS049	UCSF	no	NO	NO	NO	YES	YES	YES	NO	NO	Wang et al	Wang et al
PS050	UCSF	no	NO	NO	NO	YES	YES	YES	NO	NO	Wang et al	Wang et al
PS051	UCSF	no	NO	NO	NO	YES	YES	YES	NO	NO	Wang et al	Wang et al
PS052	UCSF	no	NO	NO	NO	YES	YES	YES	NO	NO	Wang et al	Wang et al
PS053	Suzuki	yes	NO	NO	NO	YES	YES	YES	NO	NO	Wang et al	Wang et al
PS054	Suzuki	yes	NO	NO	NO	YES	YES	YES	NO	NO	Wang et al	Wang et al
PS055	Suzuki	yes	NO	NO	NO	YES	YES	YES	NO	NO	Wang et al	Wang et al
PS056	SMC	yes	NO	NO	NO	YES	YES	YES	YES	YES	Wang et al	Wang et al
PS057	SMC	yes	NO	NO	NO	YES	YES	YES	NO	NO	Wang et al	Wang et al
PS058	SMC	yes	NO	NO	NO	YES	YES	YES	NO	NO	Wang et al	Wang et al
PS060	SMC	yes	NO	NO	NO	YES	YES	YES	YES	YES	Wang et al	Wang et al
PS061	SMC	yes	NO	NO	NO	YES	YES	YES	YES	YES	Wang et al	Wang et al
PS062	SMC	yes	NO	NO	NO	YES	YES	YES	NO	NO	Wang et al	Wang et al
PS063	SMC	yes	NO	NO	NO	YES	YES	YES	YES	YES	Wang et al	Wang et al
PS064	SMC	yes	NO	NO	NO	YES	YES	YES	YES	YES	Wang et al	Wang et al
PS065	SMC	yes	NO	NO	NO	YES	YES	YES	YES	YES	Wang et al	Wang et al
PS066	SMC	yes	NO	NO	NO	YES	YES	YES	YES	YES	Wang et al	Wang et al
PS067	SMC	yes	NO	NO	NO	YES	YES	YES	YES	YES	Wang et al	Wang et al
PS068	SMC	yes	NO	NO	NO	YES	YES	YES	YES	YES	Wang et al	Wang et al
PS069	SMC	yes	NO	NO	NO	YES	YES	YES	NO	NO	Wang et al	Wang et al
PS070	SMC	yes	NO	NO	NO	YES	YES	YES	YES	YES	Wang et al	Wang et al
PS071	SMC	yes	NO	NO	NO	YES	YES	YES	YES	YES	Wang et al	Wang et al
PS072	SMC	yes	NO	NO	NO	YES	YES	YES	YES	YES	Wang et al	Wang et al
PS073	SMC	yes	NO	NO	NO	YES	YES	YES	NO	NO	Wang et al	Wang et al
PS074	SMC	yes	NO	NO	NO	YES	YES	YES	YES	YES	Wang et al	Wang et al
PS075	SMC	yes	NO	NO	NO	YES	YES	YES	NO	NO	Wang et al	Wang et al
PS076	SMC	yes	NO	NO	NO	YES	YES	YES	YES	YES	Wang et al	Wang et al
PS078	SMC	yes	NO	NO	NO	NO	YES	YES	YES	YES	NA	NA
PS079	SMC	yes	NO	NO	NO	NO	YES	YES	NO	NO	NA	NA
PS080	SMC	yes	NO	NO	NO	NO	YES	YES	YES	YES	NA	NA
PS081	SMC	yes	NO	NO	NO	NO	YES	YES	YES	YES	NA	NA
PS082	SMC	yes	NO	NO	NO	NO	YES	YES	YES	YES	NA	NA
PS083	SMC	yes	NO	NO	NO	NO	NO	NO	YES	YES	NA	NA
PS084	SMC	yes	NO	NO	NO	NO	NO	NO	YES	YES	NA	NA
PS085	SMC	yes	NO	NO	NO	NO	NO	NO	YES	YES	NA	NA
PS087	SMC	yes	NO	NO	NO	NO	NO	NO	YES	YES	NA	NA
PS088	SMC	yes	NO	NO	NO	NO	NO	NO	YES	YES	NA	NA
PS089	SMC	yes	NO	NO	NO	NO	NO	NO	YES	YES	NA	NA
PS090	SMC	yes	NO	NO	NO	NO	NO	NO	YES	YES	NA	NA
PS092	SMC	yes	NO	NO	NO	NO	NO	NO	YES	YES	NA	NA
PS093	SMC	yes	NO	NO	NO	NO	NO	NO	YES	YES	NA	NA
PS094	SMC	yes	NO	NO	NO	YES	YES	YES	NO	NO	Wang et al	Wang et al
PS095	SMC	yes	NO	NO	NO	YES	YES	YES	YES	YES	Wang et al	Wang et al
PS096	SMC	yes	NO	NO	NO	YES	YES	YES	NO	YES	Wang et al	Wang et al
PS097	SMC	yes	NO	NO	NO	YES	YES	YES	NO	NO	Wang et al	Wang et al
PS098	SMC	yes	NO	NO	NO	YES	YES	YES	NO	NO	Wang et al	Wang et al
PS099	SMC	yes	NO	NO	NO	YES	YES	YES	YES	YES	Wang et al	Wang et al
PS100	SMC	yes	NO	NO	NO	YES	YES	YES	YES	YES	Wang et al	Wang et al
PS101	SMC	yes	NO	NO	NO	YES	YES	YES	YES	YES	Wang et al	Wang et al
PS102	SMC	yes	NO	NO	NO	YES	YES	NO	YES	YES	NA	NA
PS103	SMC	yes	NO	NO	NO	YES	YES	YES	YES	YES	Wang et al	Wang et al
PS104	SMC	yes	NO	NO	NO	YES	YES	YES	YES	YES	Wang et al	Wang et al
PS105	SMC	yes	NO	NO	NO	YES	YES	YES	YES	NO	Wang et al	Wang et al
PS106	SMC	yes	NO	NO	NO	YES	YES	YES	YES	YES	Wang et al	Wang et al
PS107	SMC	yes	NO	NO	NO	YES	YES	YES	YES	YES	Wang et al	Wang et al
PS108	SMC	yes	NO	NO	NO	YES	YES	YES	YES	YES	Wang et al	Wang et al
PS109	SMC	yes	NO	NO	NO	YES	YES	YES	YES	YES	Wang et al	Wang et al
PS110	SMC	yes	NO	NO	NO	YES	YES	YES	YES	YES	Wang et al	Wang et al
PS111	SMC	yes	NO	NO	NO	NO	NO	NO	YES	YES	NA	NA
PS112	SMC	yes	NO	NO	NO	NO	NO	NO	YES	YES	NA	NA
PS113	SMC	yes	NO	NO	NO	NO	NO	NO	YES	YES	NA	NA
PS114	SMC	yes	NO	NO	NO	YES	YES	NO	YES	YES	NA	NA
PS115	Tiantan	yes	NO	NO	NO	YES	YES	YES	NO	YES	SAVI	CNVkit
PS116	Tiantan	yes	NO	NO	NO	YES	YES	YES	NO	NO	SAVI	CNVkit
PS117	Tiantan	yes	NO	NO	NO	NO	NO	NO	YES	YES	NA	NA
PS118	Tiantan	yes	NO	NO	NO	YES	YES	YES	YES	YES	SAVI	CNVkit
PS119	Tiantan	yes	NO	NO	NO	YES	YES	YES	NO	NO	SAVI	CNVkit
PS120	Tiantan	yes	NO	NO	NO	YES	YES	YES	YES	NO	SAVI	CNVkit
PS121	Tiantan	yes	NO	NO	NO	YES	YES	YES	NO	YES	SAVI	CNVkit
PS122	Tiantan	yes	NO	NO	NO	YES	YES	YES	YES	YES	SAVI	CNVkit
PS123	Tiantan	yes	NO	NO	NO	YES	YES	YES	YES	YES	SAVI	CNVkit
PS124	Tiantan	yes	NO	NO	NO	YES	YES	YES	YES	YES	SAVI	CNVkit
PS125	Tiantan	yes	NO	NO	NO	YES	YES	YES	YES	YES	SAVI	CNVkit
PS126	Tiantan	yes	NO	NO	NO	NO	NO	NO	YES	YES	NA	NA
PS127	Tiantan	yes	NO	NO	NO	YES	YES	YES	YES	YES	SAVI	CNVkit
PS128	Tiantan	yes	NO	NO	NO	YES	YES	YES	NO	YES	SAVI	CNVkit
PS129	Tiantan	yes	NO	NO	NO	YES	YES	YES	NO	YES	SAVI	CNVkit
PS130	Tiantan	yes	NO	NO	NO	YES	YES	YES	YES	YES	SAVI	CNVkit
PS131	Tiantan	yes	NO	NO	NO	YES	YES	YES	NO	YES	SAVI	CNVkit
PS132	Tiantan	yes	YES	YES	YES	YES	YES	YES	YES	YES	SAVI	CNVkit
PS133	Tiantan	yes	YES	YES	YES	NO	NO	NO	YES	YES	SAVI	CNVkit
PS134	Tiantan	yes	YES	YES	YES	NO	NO	NO	NO	YES	NA	NA
PS135	Tiantan	yes	YES	YES	YES	NO	NO	NO	YES	YES	SAVI	CNVkit
PS136	Tiantan	yes	NO	NO	NO	NO	NO	NO	YES	YES	NA	NA
PS137	Tiantan	yes	YES	YES	YES	NO	NO	NO	YES	YES	SAVI	CNVkit
PS138	Tiantan	yes	YES	YES	YES	NO	NO	NO	YES	YES	SAVI	CNVkit
PS139	Tiantan	yes	YES	YES	YES	NO	NO	NO	YES	YES	NA	NA
PS140	Tiantan	yes	YES	YES	YES	NO	NO	NO	YES	YES	SAVI	CNVkit
PS141	Tiantan	yes	NO	NO	NO	NO	NO	NO	YES	YES	NA	NA
PS142	Tiantan	yes	NO	NO	NO	NO	NO	NO	YES	YES	NA	NA
PS143	Tiantan	yes	YES	YES	YES	NO	NO	NO	YES	YES	SAVI	CNVkit
PS144	Tiantan	yes	YES	YES	YES	NO	NO	NO	YES	YES	SAVI	CNVkit
PS145	Tiantan	yes	YES	YES	YES	NO	NO	NO	NO	YES	NA	NA
PS146	Tiantan	yes	YES	YES	YES	NO	NO	NO	YES	YES	SAVI	CNVkit
PS147	Tiantan	yes	YES	YES	YES	NO	NO	NO	YES	YES	NA	NA
PS148	Tiantan	yes	YES	YES	YES	NO	NO	NO	YES	YES	SAVI	CNVkit
PS149	Tiantan	yes	YES	YES	YES	NO	NO	NO	YES	YES	SAVI	CNVkit
PS150	Tiantan	yes	YES	YES	YES	NO	NO	NO	YES	YES	SAVI	CNVkit
PS151	Tiantan	yes	YES	YES	YES	NO	NO	NO	YES	YES	SAVI	CNVkit
PS152	Tiantan	yes	YES	YES	YES	NO	NO	NO	YES	YES	SAVI	CNVkit
PS153	Tiantan	yes	NO	NO	NO	NO	NO	NO	YES	YES	NA	NA
PS154	Tiantan	yes	YES	YES	YES	NO	NO	NO	NO	YES	NA	NA
PS155	Tiantan	yes	NO	NO	NO	NO	NO	NO	YES	YES	NA	NA
PS156	Tiantan	yes	NO	NO	NO	NO	NO	NO	YES	YES	NA	NA
PS157	Tiantan	yes	YES	YES	YES	NO	NO	NO	YES	YES	SAVI	CNVkit
PS158	Tiantan	yes	NO	NO	NO	NO	YES	NO	YES	YES	NA	NA
PS159	Tiantan	yes	NO	NO	NO	NO	NO	NO	YES	YES	NA	NA
PS160	Tiantan	yes	NO	NO	NO	NO	NO	NO	YES	YES	NA	NA
PS161	Tiantan	yes	NO	NO	NO	NO	NO	NO	YES	YES	NA	NA
PS162	Tiantan	yes	NO	NO	NO	NO	NO	NO	YES	YES	NA	NA
PS163	Tiantan	yes	NO	NO	NO	NO	NO	NO	YES	YES	NA	NA
PS164	Tiantan	yes	NO	YES	YES	NO	YES	NO	YES	YES	NA	NA
PS165	Tiantan	yes	NO	NO	NO	NO	NO	NO	YES	YES	NA	NA
PS166	Tiantan	yes	NO	NO	NO	YES	YES	NO	YES	YES	NA	NA
PS167	Tiantan	yes	NO	NO	NO	NO	NO	NO	YES	YES	NA	NA
PS168	Tiantan	yes	NO	NO	NO	NO	YES	NO	YES	YES	NA	NA
PS169	Tiantan	yes	NO	NO	NO	NO	NO	NO	YES	YES	NA	NA
PS170	Tiantan	yes	NO	NO	NO	NO	NO	NO	YES	YES	NA	NA
PS171	Tiantan	yes	NO	NO	NO	NO	NO	NO	YES	YES	NA	NA
PS172	Tiantan	yes	NO	NO	NO	NO	NO	NO	YES	YES	NA	NA
PS173	Tiantan	yes	NO	NO	NO	NO	NO	YES	YES	YES	NA	NA
PS174	Tiantan	yes	YES	YES	YES	NO	NO	NO	YES	YES	NA	NA
PS175	Tiantan	yes	NO	NO	NO	NO	NO	NO	YES	YES	NA	NA
PS176	Tiantan	yes	NO	NO	NO	NO	NO	NO	YES	YES	NA	NA
PS177	Tiantan	yes	NO	NO	NO	NO	NO	NO	YES	YES	NA	NA
PS178	Tiantan	yes	NO	NO	NO	YES	YES	YES	YES	YES	NA	NA
PS179	Tiantan	yes	NO	NO	NO	NO	NO	NO	YES	YES	NA	NA
PS180	Tiantan	yes	NO	NO	NO	NO	NO	NO	YES	YES	NA	NA
PS181	Tiantan	yes	NO	NO	NO	NO	NO	NO	YES	YES	NA	NA
PS182	Tiantan	yes	NO	NO	NO	YES	NO	YES	YES	YES	NA	NA
PS184	Tiantan	yes	NO	NO	NO	NO	NO	NO	YES	YES	NA	NA
PS185	Tiantan	yes	NO	NO	NO	NO	NO	NO	YES	YES	NA	NA
PS186	Tiantan	yes	NO	NO	NO	NO	NO	NO	YES	YES	NA	NA
PS187	Tiantan	yes	NO	NO	NO	NO	NO	NO	YES	YES	NA	NA
PS188	Tiantan	yes	NO	NO	NO	NO	NO	NO	YES	YES	NA	NA
PS189	Tiantan	yes	NO	NO	NO	NO	NO	NO	YES	YES	NA	NA
PS190	Tiantan	yes	NO	NO	NO	NO	NO	NO	YES	YES	NA	NA
PS191	UCSF	no	NO	NO	NO	YES	YES	YES	NO	NO	Barthel et al 19	Barthel et al 19
PS192	UCSF	no	NO	NO	NO	YES	YES	YES	NO	NO	Barthel et al 19	Barthel et al 19
PS193	UCSF	no	NO	NO	NO	YES	YES	YES	NO	NO	Barthel et al 19	Barthel et al 19
PS194	UCSF	no	NO	NO	NO	YES	YES	YES	NO	NO	Barthel et al 19	Barthel et al 19
PS195	UCSF	no	NO	NO	NO	YES	YES	YES	NO	NO	Barthel et al 19	Barthel et al 19
PS196	UCSF	no	NO	NO	NO	YES	YES	YES	NO	NO	Barthel et al 19	Barthel et al 19
PS197	UCSF	no	NO	NO	NO	YES	YES	YES	NO	NO	Barthel et al 19	Barthel et al 19
PS198	UCSF	no	NO	NO	NO	YES	YES	YES	NO	NO	Barthel et al 19	Barthel et al 19
PS199	UCSF	no	NO	NO	NO	YES	YES	YES	NO	NO	Barthel et al 19	Barthel et al 19
PS200	UCSF	yes	NO	NO	NO	YES	YES	YES	NO	NO	Barthel et al 19	Barthel et al 19
PS201	UCSF	yes	NO	NO	NO	YES	YES	YES	NO	NO	Barthel et al 19	Barthel et al 19
PS202	UCSF	yes	NO	NO	NO	YES	YES	YES	NO	NO	Barthel et al 19	Barthel et al 19
PS203	UCSF	yes	NO	NO	NO	YES	YES	YES	NO	NO	Barthel et al 19	Barthel et al 19
PS204	Suzuki	yes	NO	NO	NO	YES	YES	YES	NO	NO	NA	NA
PS205	Suzuki	yes	NO	NO	NO	YES	YES	YES	NO	NO	NA	NA
PS206	Suzuki	yes	NO	NO	NO	YES	YES	YES	NO	NO	NA	NA
PS208	Suzuki	yes	NO	NO	NO	YES	YES	YES	NO	NO	NA	NA
PS209	Suzuki	yes	NO	NO	NO	YES	YES	YES	NO	NO	NA	NA
PS210	Suzuki	yes	NO	NO	NO	YES	YES	YES	NO	NO	NA	NA
PS211	Yale	no	NO	NO	NO	YES	YES	YES	NO	NO	Bai et al 16	NA
PS212	Yale	no	NO	NO	NO	YES	YES	YES	NO	NO	Bai et al 16	NA
PS213	Yale	no	NO	NO	NO	YES	YES	YES	NO	NO	Bai et al 16	NA
PS214	Yale	no	NO	NO	NO	YES	YES	YES	NO	NO	Bai et al 16	NA
PS215	Yale	no	NO	NO	NO	YES	YES	YES	NO	NO	Bai et al 16	NA
PS216	Yale	no	NO	NO	NO	YES	YES	YES	NO	NO	Bai et al 16	NA
PS217	Yale	no	NO	NO	NO	YES	YES	YES	NO	NO	Bai et al 16	NA
PS218	Yale	no	NO	NO	NO	YES	YES	YES	NO	NO	Bai et al 16	NA
PS219	Yale	no	NO	NO	NO	YES	YES	YES	NO	NO	Bai et al 16	NA
PS220	Yale	no	NO	NO	NO	YES	YES	YES	NO	NO	Bai et al 16	NA
PS221	Yale	no	NO	NO	NO	YES	YES	YES	NO	NO	Bai et al 16	NA
PS222	Yale	no	NO	NO	NO	YES	YES	YES	NO	NO	Bai et al 16	NA
PS223	Yale	no	NO	NO	NO	YES	YES	YES	NO	NO	Bai et al 16	NA
PS224	Yale	no	NO	NO	NO	YES	YES	YES	NO	NO	Bai et al 16	NA
PS225	Yale	no	NO	NO	NO	YES	YES	YES	NO	NO	Bai et al 16	NA
PS226	Yale	no	NO	NO	NO	YES	YES	YES	NO	NO	Bai et al 16	NA
PS227	Yale	no	NO	NO	NO	YES	YES	YES	NO	NO	Bai et al 16	NA
PS228	Yale	no	NO	NO	NO	YES	YES	YES	NO	NO	Bai et al 16	NA
PS229	Yale	no	NO	NO	NO	YES	YES	YES	NO	NO	Bai et al 16	NA
PS230	Yale	no	NO	NO	NO	YES	YES	YES	NO	NO	Bai et al 16	NA
PS231	Yale	no	NO	NO	NO	NO	YES	YES	NO	NO	Bai et al 16	NA
PS232	Yale	no	NO	NO	NO	NO	YES	YES	NO	NO	Bai et al 16	NA
PS233	Yale	no	NO	NO	NO	NO	YES	YES	NO	NO	Bai et al 16	NA
PS234	Yale	no	NO	NO	NO	NO	YES	YES	NO	NO	Bai et al 16	NA
PS235	Yale	no	NO	NO	NO	NO	YES	YES	NO	NO	Bai et al 16	NA
PS236	Yale	no	NO	NO	NO	NO	YES	YES	NO	NO	Bai et al 16	NA
PS237	Yale	no	NO	NO	NO	NO	YES	YES	NO	NO	Bai et al 16	NA
PS238	Yale	no	NO	NO	NO	NO	YES	YES	NO	NO	Bai et al 16	NA
PS239	Yale	no	NO	NO	NO	NO	YES	YES	NO	NO	Bai et al 16	NA
PS240	Yale	no	NO	NO	NO	NO	YES	YES	NO	NO	Bai et al 16	NA
PS241	Yale	no	NO	NO	NO	NO	YES	YES	NO	NO	Bai et al 16	NA
PS242	Yale	no	NO	NO	NO	NO	YES	YES	NO	NO	Bai et al 16	NA
PS243	Yale	no	NO	NO	NO	NO	YES	YES	NO	NO	Bai et al 16	NA
PS244	Yale	no	NO	NO	NO	NO	YES	YES	NO	NO	Bai et al 16	NA
PS245	Yale	no	NO	NO	NO	NO	YES	YES	NO	NO	Bai et al 16	NA
PS246	Yale	no	NO	NO	NO	NO	YES	YES	NO	NO	Bai et al 16	NA
PS247	Yale	no	NO	NO	NO	NO	YES	YES	NO	NO	Bai et al 16	NA
PS248	Yale	no	NO	NO	NO	NO	YES	YES	NO	NO	Bai et al 16	NA
PS249	Yale	no	NO	NO	NO	NO	YES	YES	NO	NO	Bai et al 16	NA
PS250	Yale	no	NO	NO	NO	NO	YES	YES	NO	NO	Bai et al 16	NA
PS251	Yale	no	NO	NO	NO	NO	YES	YES	NO	NO	Bai et al 16	NA
PS252	TCGA-LGG	no	YES	YES	YES	YES	YES	YES	YES	YES	SAVI	CNVkit
PS253	TCGA-LGG	no	YES	YES	YES	YES	YES	YES	YES	YES	SAVI	CNVkit
PS254	TCGA-LGG	no	YES	YES	YES	YES	YES	YES	NO	YES	SAVI	CNVkit
PS255	TCGA-LGG	no	YES	YES	YES	YES	YES	YES	YES	YES	SAVI	CNVkit
PS256	TCGA-LGG	no	YES	YES	YES	YES	YES	YES	YES	YES	SAVI	CNVkit
PS257	TCGA-LGG	no	YES	YES	YES	YES	YES	YES	YES	YES	SAVI	CNVkit
PS258	TCGA-LGG	no	YES	YES	YES	YES	YES	YES	YES	YES	SAVI	CNVkit
PS259	TCGA-LGG	no	NO	NO	NO	YES	YES	YES	YES	YES	SAVI	CNVkit
PS260	TCGA-LGG	no	YES	YES	YES	YES	YES	YES	YES	YES	SAVI	CNVkit
PS261	TCGA-LGG	no	YES	YES	YES	YES	YES	YES	YES	YES	SAVI	CNVkit
PS262	TCGA-LGG	no	YES	YES	YES	YES	YES	YES	YES	YES	SAVI	CNVkit
PS263	TCGA-LGG	no	YES	YES	YES	YES	YES	YES	YES	YES	SAVI	CNVkit
PS264	TCGA-LGG	no	YES	YES	YES	YES	YES	YES	YES	YES	SAVI	CNVkit
PS265	TCGA-LGG	no	YES	YES	YES	YES	YES	YES	YES	YES	SAVI	CNVkit
PS266	SMCn	yes	NO	NO	NO	YES	YES	YES	NO	YES	SAVI	CNVkit
PS267	SMCn	yes	NO	NO	NO	YES	YES	YES	YES	YES	SAVI	CNVkit
PS268	SMCn	yes	NO	NO	NO	YES	YES	YES	YES	YES	SAVI	CNVkit
PS269	SMCn	yes	NO	NO	NO	YES	YES	YES	YES	YES	SAVI	CNVkit
PS270	SMCn	yes	NO	NO	NO	YES	YES	YES	YES	YES	SAVI	CNVkit
PS271	SMCn	yes	NO	NO	NO	YES	YES	YES	YES	YES	SAVI	CNVkit
PS272	SMCn	yes	NO	NO	NO	YES	YES	YES	YES	YES	SAVI	CNVkit
PS273	SMCn	yes	NO	NO	NO	NO	YES	YES	YES	NO	NA	NA
PS274	SMCn	yes	NO	NO	NO	YES	YES	YES	YES	NO	SAVI	CNVkit
PS275	SMCn	yes	NO	NO	NO	YES	YES	NO	YES	YES	NA	NA
PS276	SMCn	yes	NO	NO	NO	YES	YES	YES	YES	YES	SAVI	CNVkit
PS277	SMCn	yes	NO	NO	NO	YES	YES	YES	NO	YES	SAVI	NA
PS278	NWU	no	NO	NO	NO	YES	YES	YES	YES	YES	SAVI	CNVkit
PS279	NWU	no	NO	NO	NO	YES	YES	YES	YES	YES	SAVI	CNVkit
PS280	NWU	no	NO	NO	NO	YES	YES	YES	YES	YES	SAVI	CNVkit
PS281	NWU	no	NO	NO	NO	YES	YES	YES	YES	YES	SAVI	CNVkit
PS282	NWU	no	NO	NO	NO	YES	YES	YES	YES	YES	SAVI	CNVkit
PS284	NWU	no	NO	NO	NO	YES	YES	YES	YES	YES	SAVI	CNVkit
PS285	NWU	no	NO	NO	NO	YES	YES	YES	YES	YES	SAVI	CNVkit
PS286	NWU	no	NO	NO	NO	YES	YES	YES	YES	YES	SAVI	CNVkit
PS287	NWU	no	NO	NO	NO	YES	YES	YES	YES	YES	SAVI	CNVkit
PS288	NWU	no	NO	NO	NO	YES	YES	YES	YES	YES	SAVI	CNVkit
PS289	NWU	no	NO	NO	NO	YES	YES	YES	NO	YES	SAVI	CNVkit
PS291	NWU	no	NO	NO	NO	YES	YES	YES	YES	YES	SAVI	CNVkit
PS293	NWU	no	NO	NO	NO	NO	YES	YES	YES	YES	NA	NA
PS294	NWU	no	NO	NO	NO	YES	YES	YES	YES	YES	NA	NA
PS295	MSKCC	no	NO	NO	NO	panel	panel	panel	NO	NO	Jonsson et al 19	Jonsson et al 19
PS296	MSKCC	no	NO	NO	NO	panel	panel	panel	NO	NO	Jonsson et al 19	Jonsson et al 19
PS297	MSKCC	no	NO	NO	NO	panel	panel	panel	NO	NO	Jonsson et al 19	Jonsson et al 19
PS298	MSKCC	no	NO	NO	NO	panel	panel	panel	NO	NO	Jonsson et al 19	Jonsson et al 19
PS299	MSKCC	no	NO	NO	NO	panel	panel	panel	NO	NO	Jonsson et al 19	Jonsson et al 19
PS300	MSKCC	no	NO	NO	NO	panel	panel	panel	NO	NO	Jonsson et al 19	Jonsson et al 19
PS301	MSKCC	no	NO	NO	NO	panel	panel	panel	NO	NO	Jonsson et al 19	Jonsson et al 19
PS302	MSKCC	no	NO	NO	NO	panel	panel	panel	NO	NO	Jonsson et al 19	Jonsson et al 19
PS303	MSKCC	no	NO	NO	NO	panel	panel	panel	NO	NO	Jonsson et al 19	Jonsson et al 19
PS304	MSKCC	no	NO	NO	NO	panel	panel	panel	NO	NO	Jonsson et al 19	Jonsson et al 19
PS305	MSKCC	no	NO	NO	NO	panel	panel	panel	NO	NO	Jonsson et al 19	Jonsson et al 19
PS306	MSKCC	no	NO	NO	NO	panel	panel	panel	NO	NO	Jonsson et al 19	Jonsson et al 19
PS307	MSKCC	no	NO	NO	NO	panel	panel	panel	NO	NO	Jonsson et al 19	Jonsson et al 19
PS308	MSKCC	no	NO	NO	NO	panel	panel	panel	NO	NO	Jonsson et al 19	Jonsson et al 19
PS309	MSKCC	no	NO	NO	NO	panel	panel	panel	NO	NO	Jonsson et al 19	Jonsson et al 19
PS310	MSKCC	no	NO	NO	NO	panel	panel	panel	NO	NO	Jonsson et al 19	Jonsson et al 19
PS311	MSKCC	no	NO	NO	NO	panel	panel	panel	NO	NO	Jonsson et al 19	Jonsson et al 19
PS312	MSKCC	no	NO	NO	NO	panel	panel	panel	NO	NO	Jonsson et al 19	Jonsson et al 19
PS313	MSKCC	no	NO	NO	NO	panel	panel	panel	NO	NO	Jonsson et al 19	Jonsson et al 19
PS314	MSKCC	no	NO	NO	NO	panel	panel	panel	NO	NO	Jonsson et al 19	Jonsson et al 19
PS315	MSKCC	no	NO	NO	NO	panel	panel	panel	NO	NO	Jonsson et al 19	Jonsson et al 19
PS316	MSKCC	no	NO	NO	NO	panel	panel	panel	NO	NO	Jonsson et al 19	Jonsson et al 19
PS317	MSKCC	no	NO	NO	NO	panel	panel	panel	NO	NO	Jonsson et al 19	Jonsson et al 19
PS318	MSKCC	no	NO	NO	NO	panel	panel	panel	NO	NO	Jonsson et al 19	Jonsson et al 19
PS319	MSKCC	no	NO	NO	NO	panel	panel	panel	NO	NO	Jonsson et al 19	Jonsson et al 19
PS320	MSKCC	no	NO	NO	NO	panel	panel	panel	NO	NO	Jonsson et al 19	Jonsson et al 19
PS321	MSKCC	no	NO	NO	NO	panel	panel	panel	NO	NO	Jonsson et al 19	Jonsson et al 19
PS322	MSKCC	no	NO	NO	NO	panel	panel	panel	NO	NO	Jonsson et al 19	Jonsson et al 19
PS323	MSKCC	no	NO	NO	NO	panel	panel	panel	NO	NO	Jonsson et al 19	Jonsson et al 19
PS324	MSKCC	no	NO	NO	NO	panel	panel	panel	NO	NO	Jonsson et al 19	Jonsson et al 19
PS325	MSKCC	no	NO	NO	NO	panel	panel	panel	NO	NO	Jonsson et al 19	Jonsson et al 19
PS326	MSKCC	no	NO	NO	NO	panel	panel	panel	NO	NO	Jonsson et al 19	Jonsson et al 19
PS327	MSKCC	no	NO	NO	NO	panel	panel	panel	NO	NO	Jonsson et al 19	Jonsson et al 19
PS328	MSKCC	no	NO	NO	NO	panel	panel	panel	NO	NO	Jonsson et al 19	Jonsson et al 19
PS329	MSKCC	no	NO	NO	NO	panel	panel	panel	NO	NO	Jonsson et al 19	Jonsson et al 19
PS330	MSKCC	no	NO	NO	NO	panel	panel	panel	NO	NO	Jonsson et al 19	Jonsson et al 19
PS331	MSKCC	no	NO	NO	NO	panel	panel	panel	NO	NO	Jonsson et al 19	Jonsson et al 19
PS332	MSKCC	no	NO	NO	NO	panel	panel	panel	NO	NO	Jonsson et al 19	Jonsson et al 19
PS333	MSKCC	no	NO	NO	NO	panel	panel	panel	NO	NO	Jonsson et al 19	Jonsson et al 19
PS334	MSKCC	no	NO	NO	NO	panel	panel	panel	NO	NO	Jonsson et al 19	Jonsson et al 19
PS335	MSKCC	no	NO	NO	NO	panel	panel	panel	NO	NO	Jonsson et al 19	Jonsson et al 19
PS336	MSKCC	no	NO	NO	NO	panel	panel	panel	NO	NO	Jonsson et al 19	Jonsson et al 19
PS337	MSKCC	no	NO	NO	NO	panel	panel	panel	NO	NO	Jonsson et al 19	Jonsson et al 19
PS338	MSKCC	no	NO	NO	NO	panel	panel	panel	NO	NO	Jonsson et al 19	Jonsson et al 19
PS339	MSKCC	no	NO	NO	NO	panel	panel	panel	NO	NO	Jonsson et al 19	Jonsson et al 19
PS340	MSKCC	no	NO	NO	NO	panel	panel	panel	NO	NO	Jonsson et al 19	Jonsson et al 19
PS341	MSKCC	no	NO	NO	NO	panel	panel	panel	NO	NO	Jonsson et al 19	Jonsson et al 19
PS342	MSKCC	no	NO	NO	NO	panel	panel	panel	NO	NO	Jonsson et al 19	Jonsson et al 19
PS343	MSKCC	no	NO	NO	NO	panel	panel	panel	NO	NO	Jonsson et al 19	Jonsson et al 19
PS344	MSKCC	no	NO	NO	NO	panel	panel	panel	NO	NO	Jonsson et al 19	Jonsson et al 19
PS345	MSKCC	no	NO	NO	NO	panel	panel	panel	NO	NO	Jonsson et al 19	Jonsson et al 19
PS346	MSKCC	no	NO	NO	NO	panel	panel	panel	NO	NO	Jonsson et al 19	Jonsson et al 19
PS347	MSKCC	no	NO	NO	NO	panel	panel	panel	NO	NO	Jonsson et al 19	Jonsson et al 19
PS348	MSKCC	no	NO	NO	NO	panel	panel	panel	NO	NO	Jonsson et al 19	Jonsson et al 19
PS349	MSKCC	no	NO	NO	NO	panel	panel	panel	NO	NO	Jonsson et al 19	Jonsson et al 19
PS350	MSKCC	no	NO	NO	NO	panel	panel	panel	NO	NO	Jonsson et al 19	Jonsson et al 19
PS351	MSKCC	no	NO	NO	NO	panel	panel	panel	NO	NO	Jonsson et al 19	Jonsson et al 19
PS352	MSKCC	no	NO	NO	NO	panel	panel	panel	NO	NO	Jonsson et al 19	Jonsson et al 19
PS353	MSKCC	no	NO	NO	NO	panel	panel	panel	NO	NO	Jonsson et al 19	Jonsson et al 19
PS354	MSKCC	no	NO	NO	NO	panel	panel	panel	NO	NO	Jonsson et al 19	Jonsson et al 19
PS355	MSKCC	no	NO	NO	NO	panel	panel	panel	NO	NO	Jonsson et al 19	Jonsson et al 19
PS356	MSKCC	no	NO	NO	NO	panel	panel	panel	NO	NO	Jonsson et al 19	Jonsson et al 19
PS357	MSKCC	no	NO	NO	NO	panel	panel	panel	NO	NO	Jonsson et al 19	Jonsson et al 19
PS358	MSKCC	no	NO	NO	NO	panel	panel	panel	NO	NO	Jonsson et al 19	Jonsson et al 19
PS359	MSKCC	no	NO	NO	NO	panel	panel	panel	NO	NO	Jonsson et al 19	Jonsson et al 19
PS360	MSKCC	no	NO	NO	NO	panel	panel	panel	NO	NO	Jonsson et al 19	Jonsson et al 19
PS365	MSKCC	no	NO	NO	NO	panel	panel	panel	NO	NO	Jonsson et al 19	Jonsson et al 19
PS366	GLSS	no	NO	NO	NO	YES	YES	YES	NO	NO	Barthel et al 19	Barthel et al 19
PS367	GLSS	no	NO	NO	NO	YES	YES	YES	NO	NO	Barthel et al 19	Barthel et al 19
PS368	GLSS	no	NO	NO	NO	YES	YES	YES	NO	NO	Barthel et al 19	Barthel et al 19
PS369	GLSS	no	NO	NO	NO	YES	YES	YES	NO	NO	Barthel et al 19	Barthel et al 19
PS370	GLSS	no	NO	NO	NO	YES	YES	YES	NO	NO	Barthel et al 19	Barthel et al 19
PS371	GLSS	no	NO	NO	NO	YES	YES	YES	NO	NO	Barthel et al 19	Barthel et al 19
PS372	GLSS	no	NO	NO	NO	YES	YES	YES	NO	NO	Barthel et al 19	Barthel et al 19
PS373	GLSS	no	NO	NO	NO	YES	YES	YES	NO	NO	Barthel et al 19	Barthel et al 19
PS374	GLSS	no	NO	NO	NO	YES	YES	YES	NO	NO	Barthel et al 19	Barthel et al 19
PS375	GLSS	no	NO	NO	NO	YES	YES	YES	NO	NO	Barthel et al 19	Barthel et al 19
PS376	GLSS	no	NO	NO	NO	YES	YES	YES	NO	NO	Barthel et al 19	Barthel et al 19
PS377	GLSS	no	NO	NO	NO	YES	YES	YES	NO	NO	Barthel et al 19	Barthel et al 19
PS378	GLSS	no	NO	NO	NO	YES	YES	YES	NO	NO	Barthel et al 19	Barthel et al 19
PS379	GLSS	no	NO	NO	NO	YES	YES	YES	NO	NO	Barthel et al 19	Barthel et al 19
PS380	GLSS	no	NO	NO	NO	YES	YES	YES	NO	NO	Barthel et al 19	Barthel et al 19
PS381	GLSS	no	NO	NO	NO	YES	YES	YES	NO	NO	Barthel et al 19	Barthel et al 19
PS382	GLSS	no	NO	NO	NO	YES	YES	YES	NO	NO	Barthel et al 19	Barthel et al 19
PS383	GLSS	no	NO	NO	NO	YES	YES	YES	NO	NO	Barthel et al 19	Barthel et al 19
PS384	GLSS	no	NO	NO	NO	YES	YES	YES	NO	NO	Barthel et al 19	Barthel et al 19
PS385	GLSS	no	NO	NO	NO	YES	YES	YES	NO	NO	Barthel et al 19	Barthel et al 19
PS386	GLSS	no	NO	NO	NO	YES	YES	YES	NO	NO	Barthel et al 19	Barthel et al 19
PS387	GLSS	no	NO	NO	NO	YES	YES	YES	NO	NO	Barthel et al 19	Barthel et al 19
PS388	GLSS	no	NO	NO	NO	YES	YES	YES	NO	NO	Barthel et al 19	Barthel et al 19
PS389	GLSS	no	NO	NO	NO	YES	YES	YES	NO	NO	Barthel et al 19	Barthel et al 19
PS390	GLSS	no	NO	NO	NO	YES	YES	YES	NO	NO	Barthel et al 19	Barthel et al 19
PS391	GLSS	no	NO	NO	NO	YES	YES	YES	NO	NO	Barthel et al 19	Barthel et al 19
PS392	GLSS	no	NO	NO	NO	YES	YES	YES	NO	NO	Barthel et al 19	Barthel et al 19
PS393	GLSS	no	NO	NO	NO	YES	YES	YES	NO	NO	Barthel et al 19	Barthel et al 19
PS394	GLSS	no	NO	NO	NO	YES	YES	YES	NO	NO	Barthel et al 19	Barthel et al 19
PS395	GLSS	no	NO	NO	NO	YES	YES	YES	NO	NO	Barthel et al 19	Barthel et al 19
PS396	GLSS	no	NO	NO	NO	YES	YES	YES	NO	NO	Barthel et al 19	Barthel et al 19
PS397	GLSS	no	NO	NO	NO	YES	YES	YES	NO	NO	Barthel et al 19	Barthel et al 19
PS398	GLSS	no	NO	NO	NO	YES	YES	YES	NO	NO	Barthel et al 19	Barthel et al 19
PS399	GLSS	no	NO	NO	NO	YES	YES	YES	NO	NO	Barthel et al 19	Barthel et al 19
PS400	GLSS	no	NO	NO	NO	YES	YES	YES	NO	NO	Barthel et al 19	Barthel et al 19
PS401	GLSS	no	NO	NO	NO	YES	YES	YES	NO	NO	Barthel et al 19	Barthel et al 19
PS402	GLSS	no	NO	NO	NO	YES	YES	YES	NO	NO	Barthel et al 19	Barthel et al 19
PS403	GLSS	no	NO	NO	NO	YES	YES	YES	NO	NO	Barthel et al 19	Barthel et al 19
PS404	GLSS	no	NO	NO	NO	YES	YES	YES	NO	NO	Barthel et al 19	Barthel et al 19
PS405	GLSS	no	NO	NO	NO	YES	YES	YES	NO	NO	Barthel et al 19	Barthel et al 19
PS406	GLSS	no	NO	NO	NO	YES	YES	YES	NO	NO	Barthel et al 19	Barthel et al 19
PS407	GLSS	no	NO	NO	NO	YES	YES	YES	NO	NO	Barthel et al 19	Barthel et al 19
PS408	GLSS	no	NO	NO	NO	YES	YES	YES	NO	NO	Barthel et al 19	Barthel et al 19
PS409	GLSS	no	NO	NO	NO	YES	YES	YES	NO	NO	Barthel et al 19	Barthel et al 19
PS410	GLSS	no	NO	NO	NO	YES	YES	YES	NO	NO	Barthel et al 19	Barthel et al 19
PS411	GLSS	yes	YES	YES	YES	YES	YES	YES	NO	NO	Barthel et al 19	Barthel et al 19
PS412	GLSS	yes	YES	YES	YES	YES	YES	YES	NO	NO	Barthel et al 19	Barthel et al 19
PS413	GLSS	yes	YES	YES	YES	YES	YES	YES	NO	NO	Barthel et al 19	Barthel et al 19
PS414	GLSS	yes	YES	YES	YES	YES	YES	YES	NO	NO	Barthel et al 19	Barthel et al 19
PS415	GLSS	yes	YES	YES	YES	YES	YES	YES	NO	NO	Barthel et al 19	Barthel et al 19
PS416	GLSS	no	YES	YES	YES	NO	NO	NO	NO	NO	Barthel et al 19	Barthel et al 19
PS417	GLSS	no	NO	NO	NO	YES	YES	YES	NO	NO	Barthel et al 19	Barthel et al 19
PS418	GLSS	no	NO	NO	NO	YES	YES	YES	NO	NO	Barthel et al 19	Barthel et al 19
PS419	GLSS	no	NO	NO	NO	YES	YES	YES	NO	NO	Barthel et al 19	Barthel et al 19
PS420	GLSS	no	NO	NO	NO	YES	YES	YES	NO	NO	Barthel et al 19	Barthel et al 19
PS421	GLSS	no	NO	NO	NO	YES	YES	YES	NO	NO	Barthel et al 19	Barthel et al 19
PS422	GLSS	no	NO	NO	NO	YES	YES	YES	NO	NO	Barthel et al 19	Barthel et al 19
PS423	GLSS	no	NO	NO	NO	YES	YES	YES	NO	NO	Barthel et al 19	Barthel et al 19
PS424	GLSS	no	NO	NO	NO	YES	YES	YES	NO	NO	Barthel et al 19	Barthel et al 19
PS425	GLSS	no	NO	NO	NO	YES	YES	YES	NO	NO	Barthel et al 19	Barthel et al 19
PS426	GLSS	no	NO	NO	NO	YES	YES	YES	NO	NO	Barthel et al 19	Barthel et al 19
PS427	GLSS	no	YES	YES	YES	NO	NO	NO	NO	NO	Barthel et al 19	Barthel et al 19
PS428	GLSS	no	YES	YES	YES	NO	NO	NO	NO	NO	Barthel et al 19	Barthel et al 19
PS429	GLSS	no	YES	YES	YES	NO	NO	NO	NO	NO	Barthel et al 19	Barthel et al 19
PS430	GLSS	no	YES	YES	YES	NO	NO	NO	NO	NO	Barthel et al 19	Barthel et al 19
PS431	GLSS	no	YES	YES	YES	NO	NO	NO	NO	NO	Barthel et al 19	Barthel et al 19
PS432	GLSS	no	YES	YES	YES	NO	NO	NO	NO	NO	Barthel et al 19	Barthel et al 19
PS433	GLSS	no	YES	YES	YES	NO	NO	NO	NO	NO	Barthel et al 19	Barthel et al 19
PS434	GLSS	no	YES	YES	YES	NO	NO	NO	NO	NO	Barthel et al 19	Barthel et al 19
PS435	GLSS	no	YES	YES	YES	NO	NO	NO	NO	NO	Barthel et al 19	Barthel et al 19
PS436	GLSS	no	YES	YES	YES	NO	NO	NO	NO	NO	Barthel et al 19	Barthel et al 19
PS437	GLSS	no	YES	YES	YES	NO	NO	NO	NO	NO	Barthel et al 19	Barthel et al 19
PS438	GLSS	no	YES	YES	YES	NO	NO	NO	NO	NO	Barthel et al 19	Barthel et al 19
PS439	GLSS	no	YES	YES	YES	NO	NO	NO	NO	NO	Barthel et al 19	Barthel et al 19
PS440	GLSS	no	YES	YES	YES	NO	NO	NO	NO	NO	Barthel et al 19	Barthel et al 19
PS441	GLSS	no	YES	YES	YES	NO	NO	NO	NO	NO	Barthel et al 19	Barthel et al 19
PS442	GLSS	no	YES	YES	YES	NO	NO	NO	NO	NO	Barthel et al 19	Barthel et al 19
PS443	GLSS	no	YES	YES	YES	NO	NO	NO	NO	NO	Barthel et al 19	Barthel et al 19
PS444	GLSS	no	YES	YES	YES	YES	YES	YES	NO	NO	Barthel et al 19	Barthel et al 19
PS445	GLSS	no	YES	YES	YES	NO	NO	NO	NO	NO	Barthel et al 19	Barthel et al 19
PS446	GLSS	no	YES	YES	YES	YES	YES	YES	NO	NO	Barthel et al 19	Barthel et al 19
PS447	GLSS	no	YES	YES	YES	NO	NO	NO	NO	NO	Barthel et al 19	Barthel et al 19
PS448	GLSS	no	YES	YES	YES	NO	NO	NO	NO	NO	Barthel et al 19	Barthel et al 19
PS449	GLSS	no	YES	YES	YES	NO	NO	NO	NO	NO	Barthel et al 19	Barthel et al 19
PS450	GLSS	no	YES	YES	YES	NO	NO	NO	NO	NO	Barthel et al 19	Barthel et al 19
PS451	GLSS	no	YES	YES	YES	NO	NO	NO	NO	NO	Barthel et al 19	Barthel et al 19
PS452	GLSS	no	YES	YES	YES	NO	NO	NO	NO	NO	Barthel et al 19	Barthel et al 19
PS453	GLSS	no	YES	YES	YES	NO	NO	NO	NO	NO	Barthel et al 19	Barthel et al 19
PS454	GLSS	no	YES	YES	YES	NO	NO	NO	NO	NO	Barthel et al 19	Barthel et al 19
PS455	GLSS	no	YES	YES	YES	NO	NO	NO	NO	NO	Barthel et al 19	Barthel et al 19
PS456	GLSS	no	YES	YES	YES	NO	NO	NO	NO	NO	Barthel et al 19	Barthel et al 19
PS457	GLSS	no	YES	YES	YES	NO	NO	NO	NO	NO	Barthel et al 19	Barthel et al 19
PS458	GLSS	no	YES	YES	YES	NO	NO	NO	NO	NO	Barthel et al 19	Barthel et al 19
PS459	GLSS	no	YES	YES	YES	NO	NO	NO	NO	NO	Barthel et al 19	Barthel et al 19
PS460	GLSS	no	YES	YES	YES	NO	NO	NO	NO	NO	Barthel et al 19	Barthel et al 19
PS461	GLSS	no	YES	YES	YES	NO	NO	NO	NO	NO	Barthel et al 19	Barthel et al 19
PS462	GLSS	no	NO	NO	NO	YES	YES	YES	NO	NO	Barthel et al 19	Barthel et al 19
PS463	GLSS	no	NO	NO	NO	YES	YES	YES	NO	NO	Barthel et al 19	Barthel et al 19
PS464	GLSS	no	NO	NO	NO	YES	YES	YES	NO	NO	Barthel et al 19	Barthel et al 19
PS465	GLSS	no	NO	NO	NO	YES	YES	YES	NO	NO	Barthel et al 19	Barthel et al 19
PS466	GLSS	no	NO	NO	NO	YES	YES	YES	NO	NO	Barthel et al 19	Barthel et al 19
PS467	GLSS	no	NO	NO	NO	YES	YES	YES	NO	NO	Barthel et al 19	Barthel et al 19
PS468	GLSS	no	NO	NO	NO	YES	YES	YES	NO	NO	Barthel et al 19	Barthel et al 19
PS469	GLSS	no	NO	NO	NO	YES	YES	YES	NO	NO	Barthel et al 19	Barthel et al 19
PS470	GLSS	no	NO	NO	NO	YES	YES	YES	NO	NO	Barthel et al 19	Barthel et al 19
PS471	GLSS	no	NO	NO	NO	YES	YES	YES	NO	NO	Barthel et al 19	Barthel et al 19
PS472	GLSS	no	YES	YES	YES	YES	YES	YES	NO	NO	Barthel et al 19	Barthel et al 19
PS473	GLSS	no	NO	NO	NO	YES	YES	YES	NO	NO	Barthel et al 19	Barthel et al 19
PS474	GLSS	no	YES	YES	YES	YES	YES	YES	NO	NO	Barthel et al 19	Barthel et al 19
PS475	GLSS	no	YES	YES	YES	YES	YES	YES	NO	NO	Barthel et al 19	Barthel et al 19
PS476	GLSS	no	YES	YES	YES	YES	YES	YES	NO	NO	Barthel et al 19	Barthel et al 19
PS477	GLSS	no	YES	YES	YES	YES	YES	YES	NO	NO	Barthel et al 19	Barthel et al 19
PS478	GLSS	no	NO	NO	NO	YES	YES	YES	NO	NO	Barthel et al 19	Barthel et al 19
PS479	GLSS	no	NO	NO	NO	YES	YES	YES	NO	NO	Barthel et al 19	Barthel et al 19
PS480	GLSS	no	NO	NO	NO	YES	YES	YES	NO	NO	Barthel et al 19	Barthel et al 19
PS481	GLSS	no	NO	NO	NO	YES	YES	YES	NO	NO	Barthel et al 19	Barthel et al 19
PS482	GLSS	no	NO	NO	NO	YES	YES	YES	NO	NO	Barthel et al 19	Barthel et al 19
PS483	GLSS	no	NO	NO	NO	YES	YES	YES	NO	NO	Barthel et al 19	Barthel et al 19
PS484	GLSS	no	NO	NO	NO	YES	YES	YES	NO	NO	Barthel et al 19	Barthel et al 19
PS485	GLSS	no	NO	NO	NO	YES	YES	YES	NO	NO	Barthel et al 19	Barthel et al 19
PS486	GLSS	no	NO	NO	NO	YES	YES	YES	NO	NO	Barthel et al 19	Barthel et al 19
PS487	GLSS	no	NO	NO	NO	YES	YES	YES	NO	NO	Barthel et al 19	Barthel et al 19
PS488	GLSS	no	YES	YES	YES	NO	NO	NO	NO	NO	Barthel et al 19	Barthel et al 19
PS489	GLSS	no	NO	NO	NO	YES	YES	YES	NO	NO	Barthel et al 19	Barthel et al 19
PS490	GLSS	no	NO	NO	NO	YES	YES	YES	NO	NO	Barthel et al 19	Barthel et al 19
PS491	GLSS	no	NO	NO	NO	YES	YES	YES	NO	NO	Barthel et al 19	Barthel et al 19
PS492	GLSS	no	NO	NO	NO	YES	YES	YES	NO	NO	Barthel et al 19	Barthel et al 19
PS493	GLSS	no	NO	NO	NO	YES	YES	YES	NO	NO	Barthel et al 19	Barthel et al 19
PS494	GLSS	no	NO	NO	NO	YES	YES	YES	NO	NO	Barthel et al 19	Barthel et al 19
PS495	GLSS	no	NO	NO	NO	YES	YES	YES	NO	NO	Barthel et al 19	Barthel et al 19
PS496	GLSS	no	NO	NO	NO	YES	YES	YES	NO	NO	Barthel et al 19	Barthel et al 19
PS497	GLSS	no	NO	NO	NO	YES	YES	YES	NO	NO	Barthel et al 19	Barthel et al 19
PS498	GLSS	no	NO	NO	NO	YES	YES	YES	NO	NO	Barthel et al 19	Barthel et al 19
PS499	GLSS	no	NO	NO	NO	YES	YES	YES	NO	NO	Barthel et al 19	Barthel et al 19
PS500	GLSS	no	NO	NO	NO	YES	YES	YES	NO	NO	Barthel et al 19	Barthel et al 19
PS501	GLSS	no	NO	NO	NO	YES	YES	YES	NO	NO	Barthel et al 19	Barthel et al 19
PS502	GLSS	no	NO	NO	NO	YES	YES	YES	NO	NO	Barthel et al 19	Barthel et al 19
PS503	GLSS	no	NO	NO	NO	YES	YES	YES	NO	NO	Barthel et al 19	Barthel et al 19
PS504	GLSS	no	NO	NO	NO	YES	YES	YES	NO	NO	Barthel et al 19	Barthel et al 19
PSX01	Tiantan	yes	NO	NO	NO	YES	YES	YES	YES	YES	SAVI	CNVkit
PSX02	Tiantan	yes	NO	NO	NO	YES	YES	YES	YES	YES	SAVI	CNVkit
PSX03	Tiantan	yes	NO	YES	NO	YES	NO	YES	NO	NO	SAVI	CNVkit
PSX04	Tiantan	yes	NO	NO	NO	YES	YES	YES	YES	NO	SAVI	CNVkit
PSX05	Tiantan	yes	NO	NO	NO	YES	YES	YES	YES	YES	SAVI	CNVkit
PSX06	Tiantan	yes	NO	NO	NO	YES	YES	YES	NO	NO	SAVI	CNVkit
PSX07	Tiantan	yes	NO	NO	NO	YES	YES	YES	YES	YES	SAVI	CNVkit
PSX08	Tiantan	yes	NO	NO	NO	NO	YES	NO	YES	YES	NA	NA
PSX09	Tiantan	yes	NO	NO	NO	YES	YES	YES	YES	YES	SAVI	CNVkit
PSX10	Tiantan	yes	NO	NO	NO	YES	YES	YES	NO	YES	NA	NA
PSX11	Tiantan	yes	NO	NO	NO	YES	YES	YES	NO	YES	SAVI	CNVkit
PSX12	Tiantan	yes	NO	NO	NO	YES	YES	YES	NO	YES	NA	NA
PSX13	Tiantan	yes	NO	NO	NO	YES	YES	YES	YES	YES	SAVI	CNVkit
PSX14	Tiantan	yes	NO	NO	NO	YES	YES	YES	YES	YES	SAVI	CNVkit
PSX15	CUHK	yes	NO	NO	NO	YES	YES	YES	YES	YES	SAVI	CNVkit
PSX16	CUHK	yes	NO	NO	NO	YES	YES	YES	YES	YES	SAVI	CNVkit
PSX17	CUHK	yes	NO	NO	NO	NO	YES	NO	YES	YES	NA	NA
PSX18	CUHK	yes	NO	NO	NO	YES	YES	YES	YES	YES	SAVI	CNVkit
PSX19	CUHK	yes	NO	NO	NO	YES	YES	YES	YES	NO	SAVI	CNVkit
PSX20	CUHK	yes	NO	NO	NO	YES	YES	YES	YES	YES	SAVI	CNVkit
